# Supplementary material for: Root zone soil moisture in over 25 % of global land permanently beyond pre-industrial variability as early as 2050 without climate policy
Source: Copernicus journal article supplement (doi:10.5194/hess-27-3999-2023), 2023-11-09
Supplement: Supplementary file 1 [file hess-27-3999-2023-supplement.pdf]

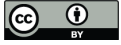

*Supplement of*

## **Root zone soil moisture in over 25 % of global land permanently beyond pre-industrial variability as early as 2050 without climate policy**

**En Ning Lai et al.**

*Correspondence to:* Ruud J. van der Ent ([r.j.vanderent@tudelft.nl](mailto:r.j.vanderent@tudelft.nl))

The copyright of individual parts of the supplement might differ from the article licence.

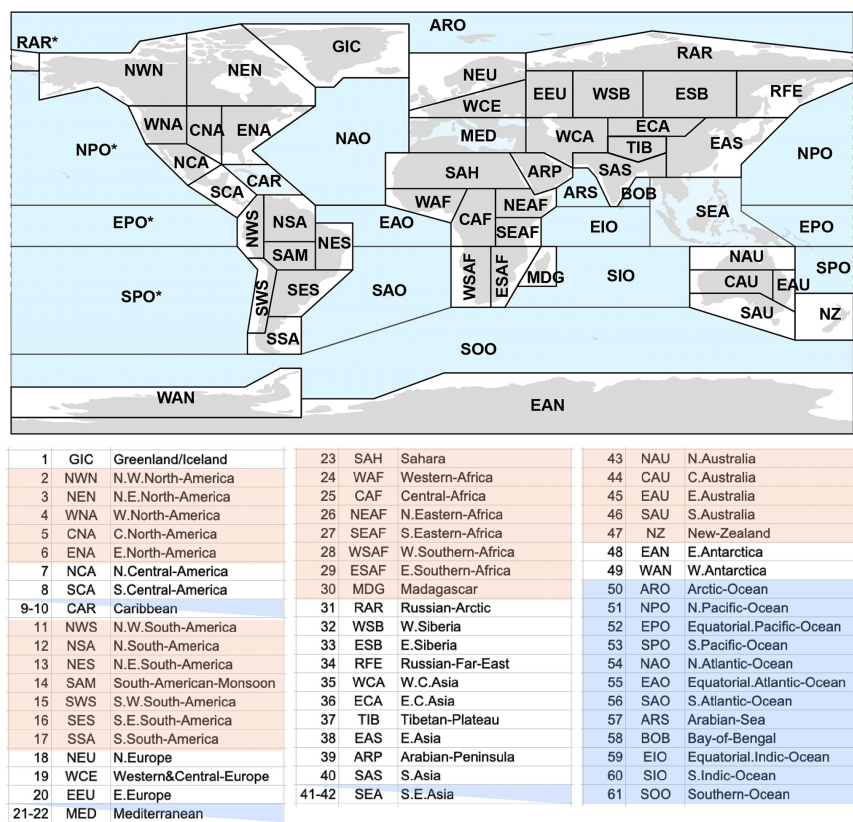

**Figure S1.** Intergovernmental Panel on Climate Change Working Group I (IPCC WGI) climate reference regions (Iturbide et al., 2020).

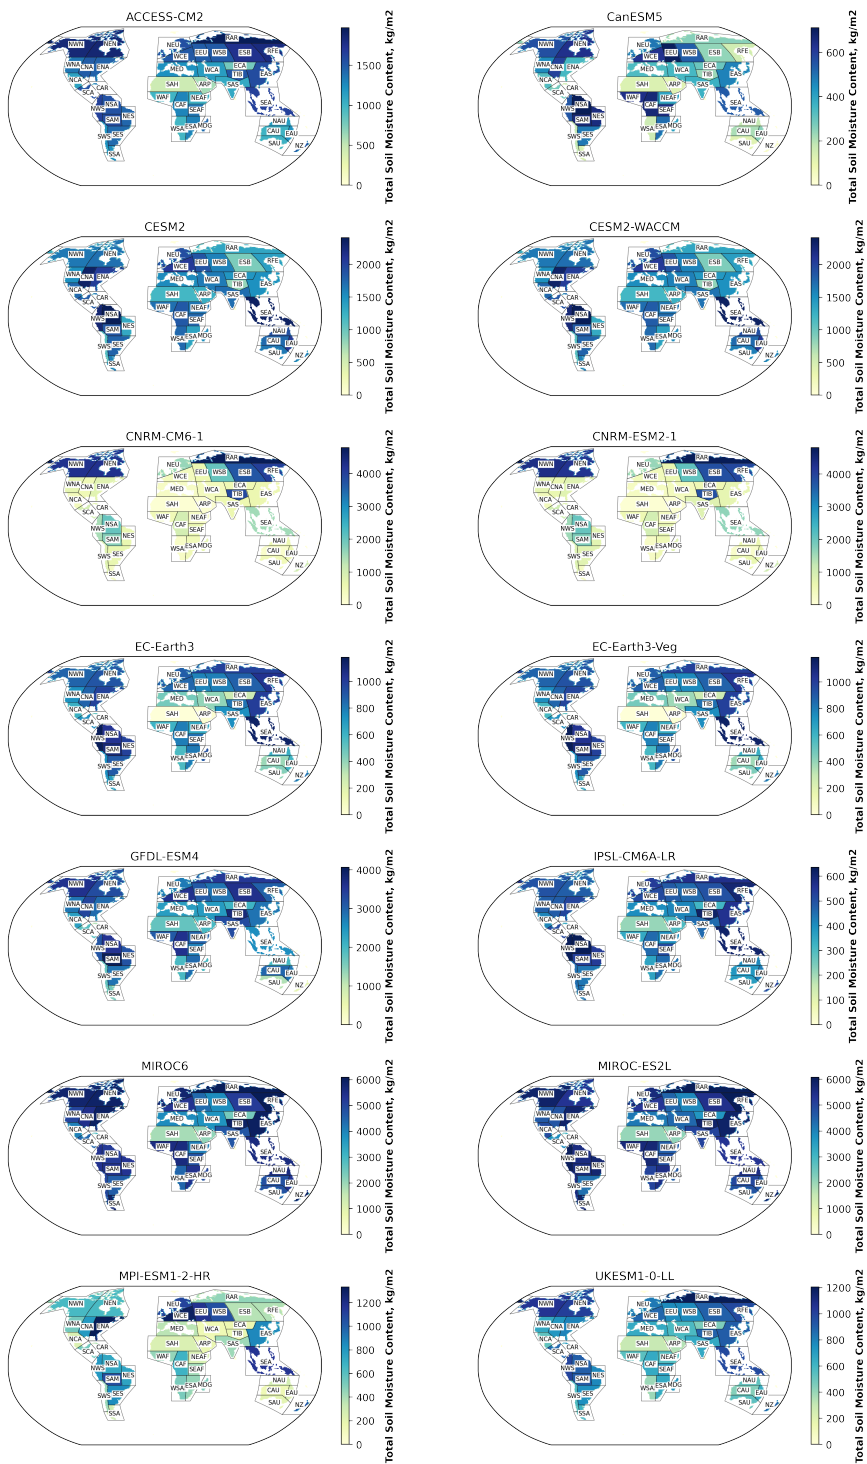

**Figure S2.** The maps show the 80-year average values of the regional monthly total soil moisture content from the PiControl scenario.

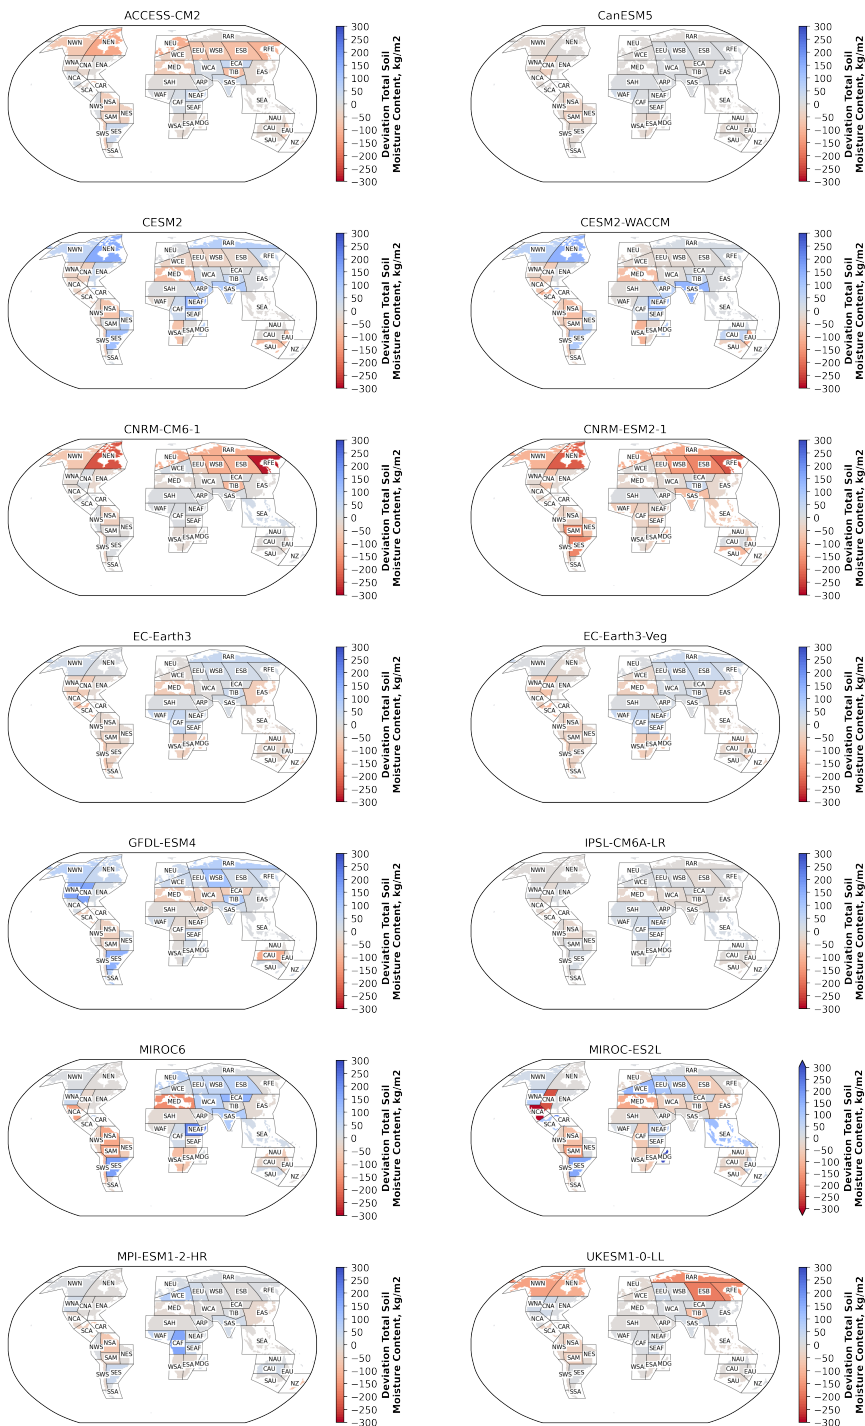

**Figure S3.** The deviation of the yearly mean total soil moisture content between 2071 and 2100 in SSP1-2.6 from the PiControl scenario for each Earth System Model (ESM). The regions with a lower soil moisture content than the PiControl baseline are in red while the regions with higher soil moisture are in blue.

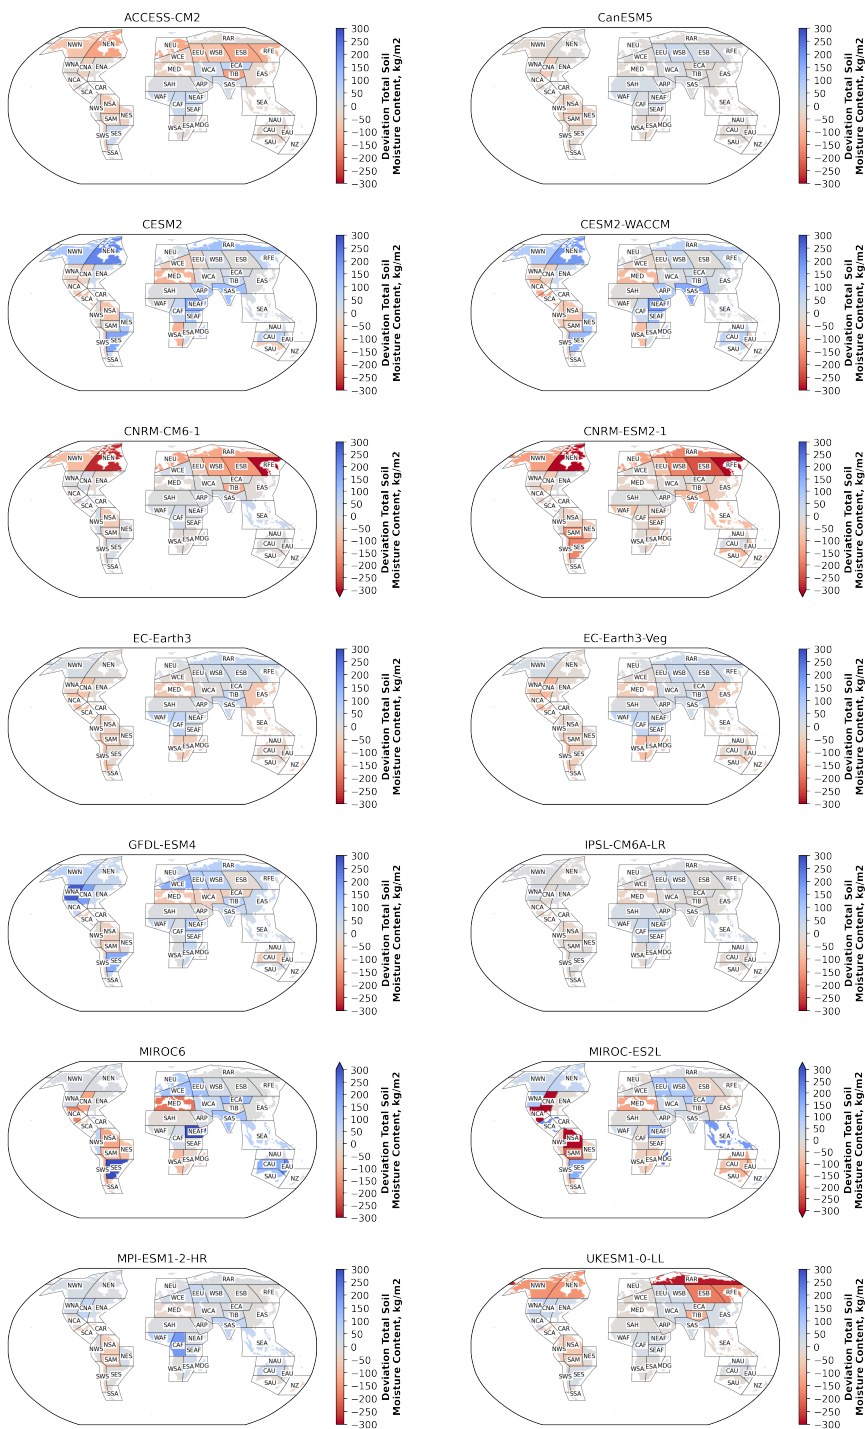

Figure S4. As in S3, but for the SSP2-4.5 scenario.

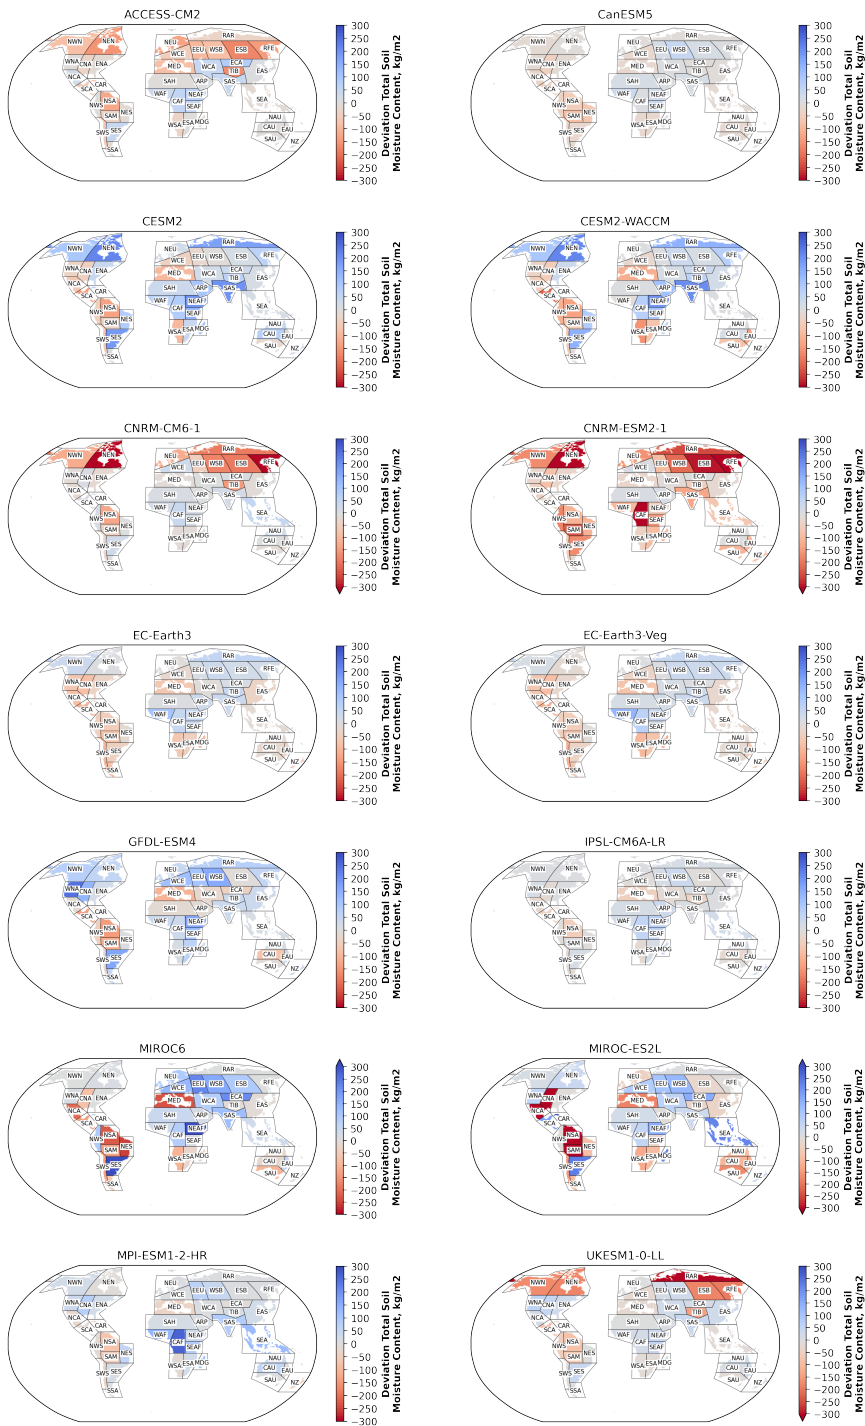

Figure S5. As in S3, but for the SSP3-7.0 scenario.

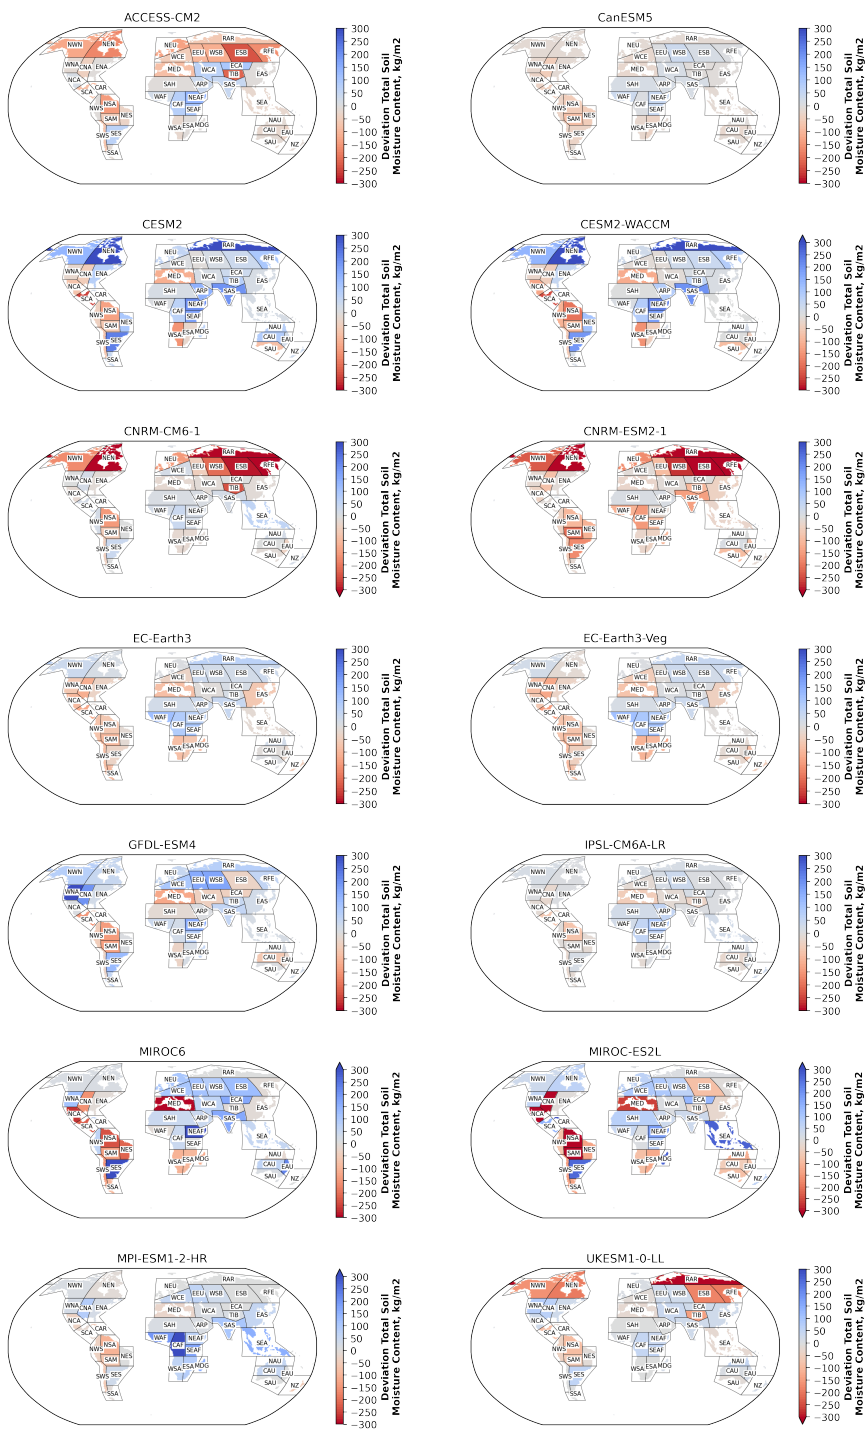

Figure S6. As in S3, but for the SSP5-8.5 scenario.

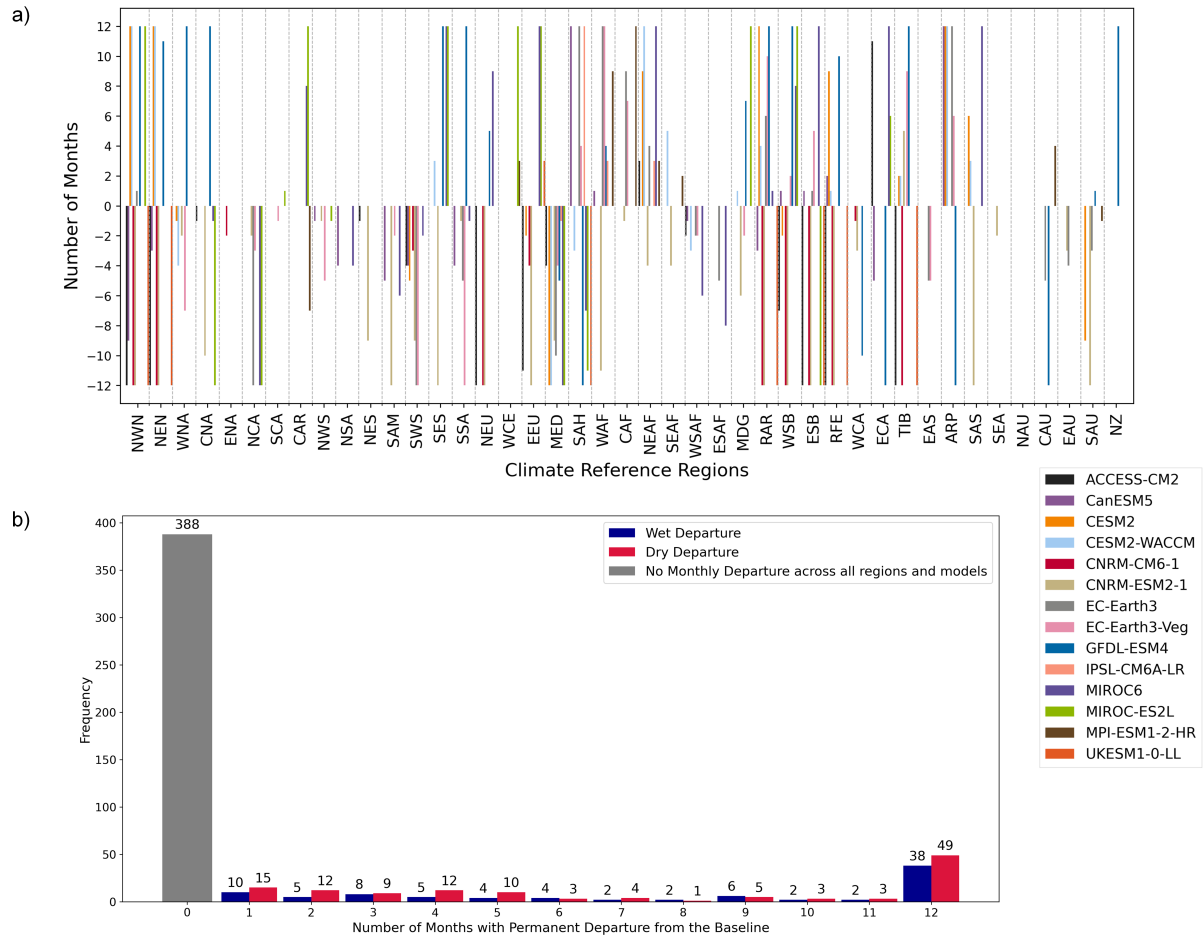

**Figure S7. (a)** For the SSP1-2.6 scenario: The number of months there is a permanent departure from the PiControl baseline variability for each of the climate reference regions (x-axis). The colors indicate the different climate models (legend on the lower-right corner). **(b)** Same data as in (a), but illustrating the frequency of the number of months with a permanent departure across each model and region. Zero indicates that a particular region in a model has no permanent departure at all.



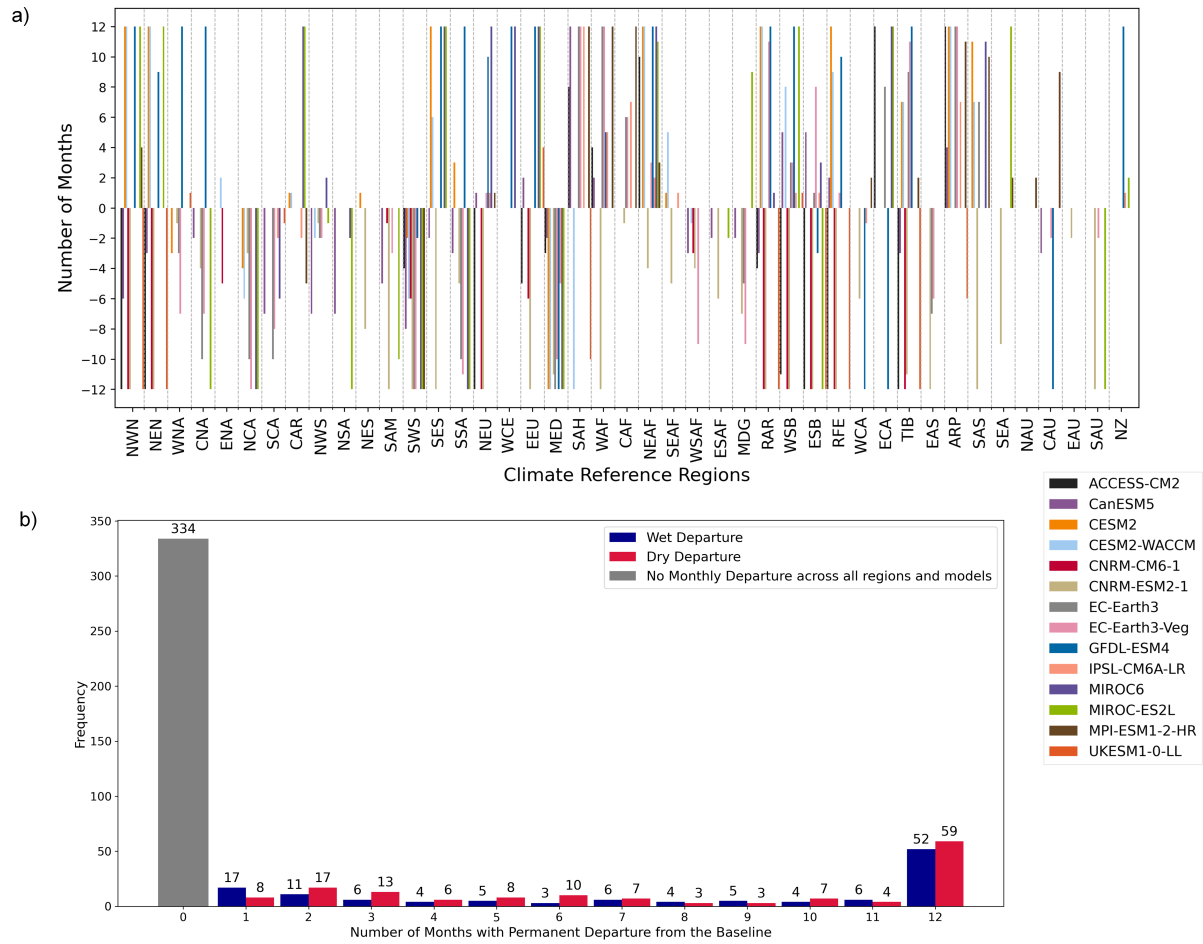

**Figure S8.** As in S7, but for the SSP2-4.5 scenario.

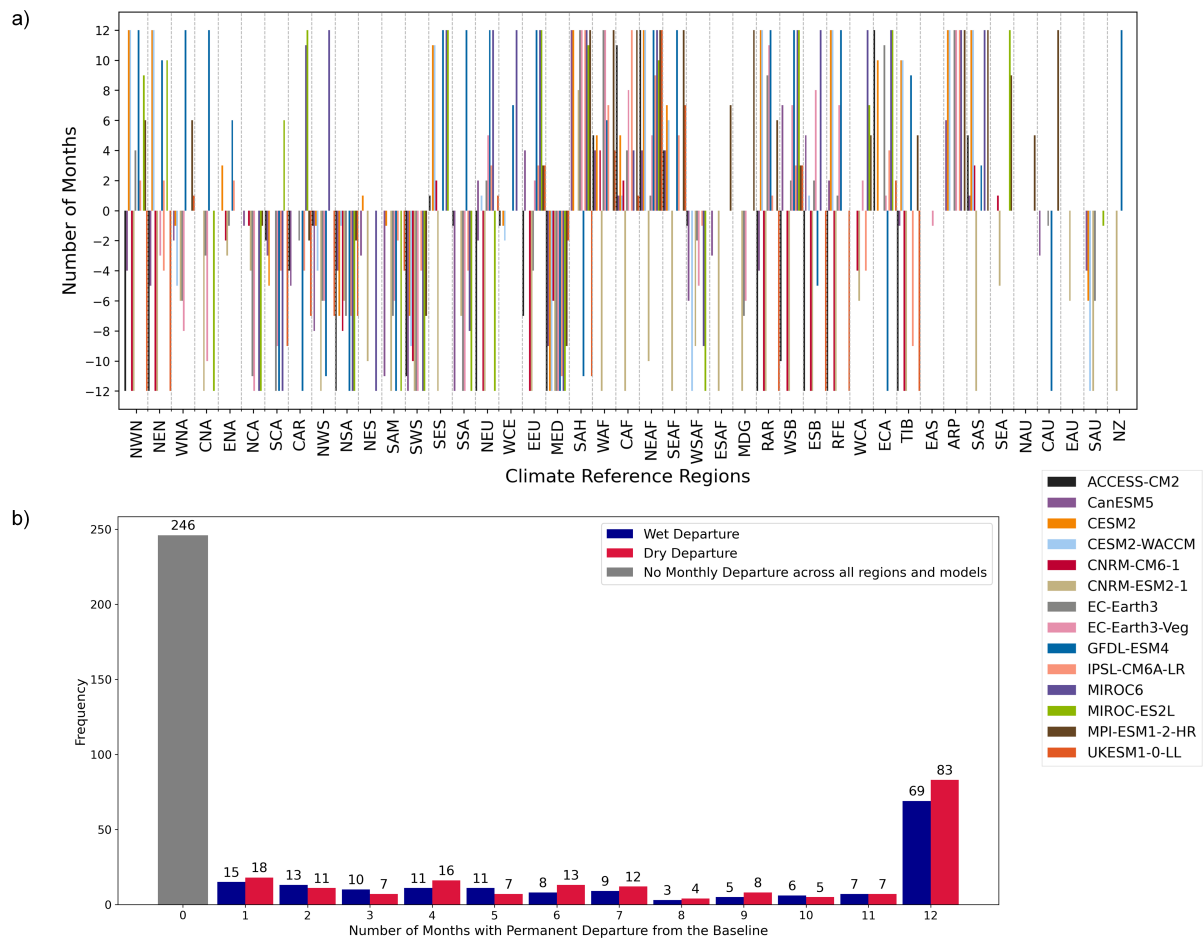

**Figure S9.** As in S7, but for the SSP3-7.0 scenario.

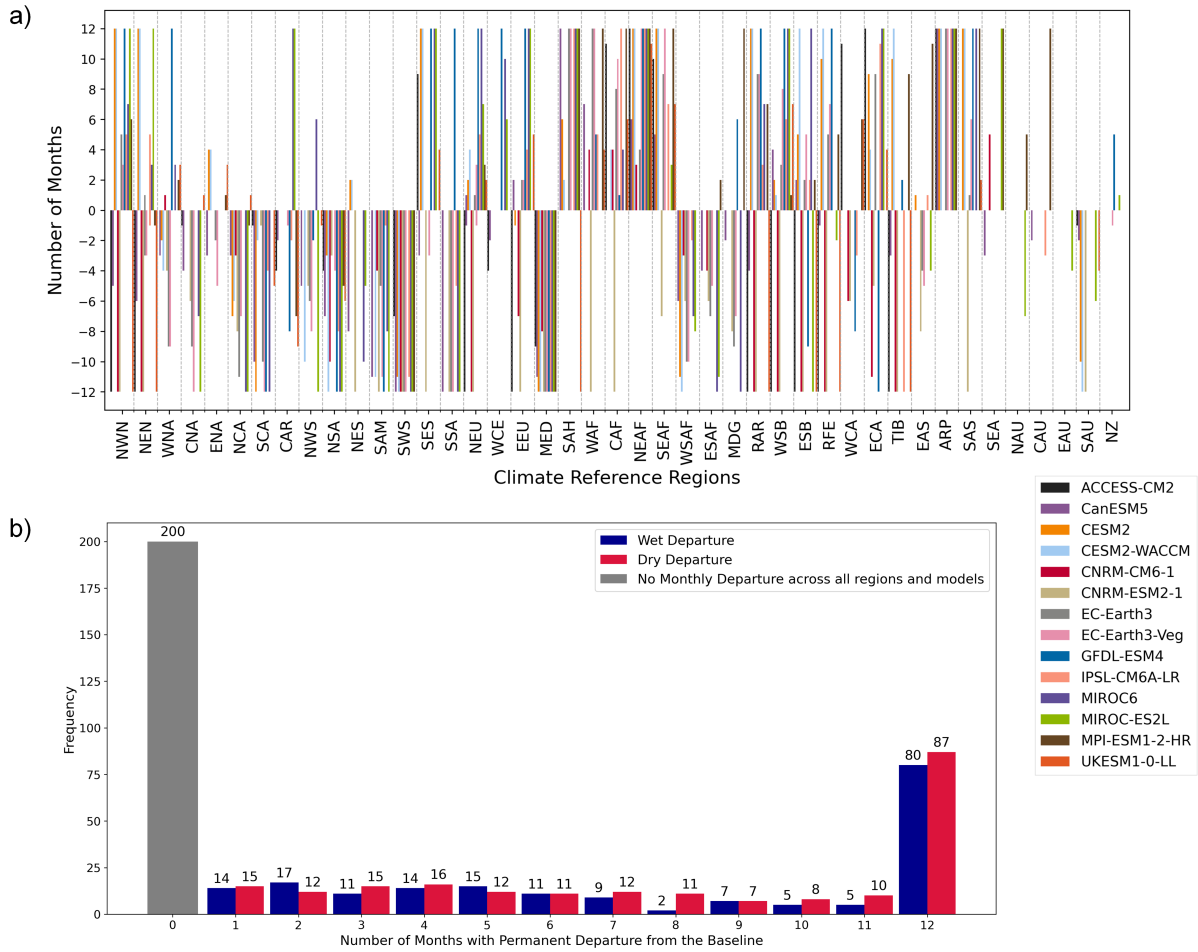

Figure S10. As in S7, but for the SSP5-8.5 scenario.

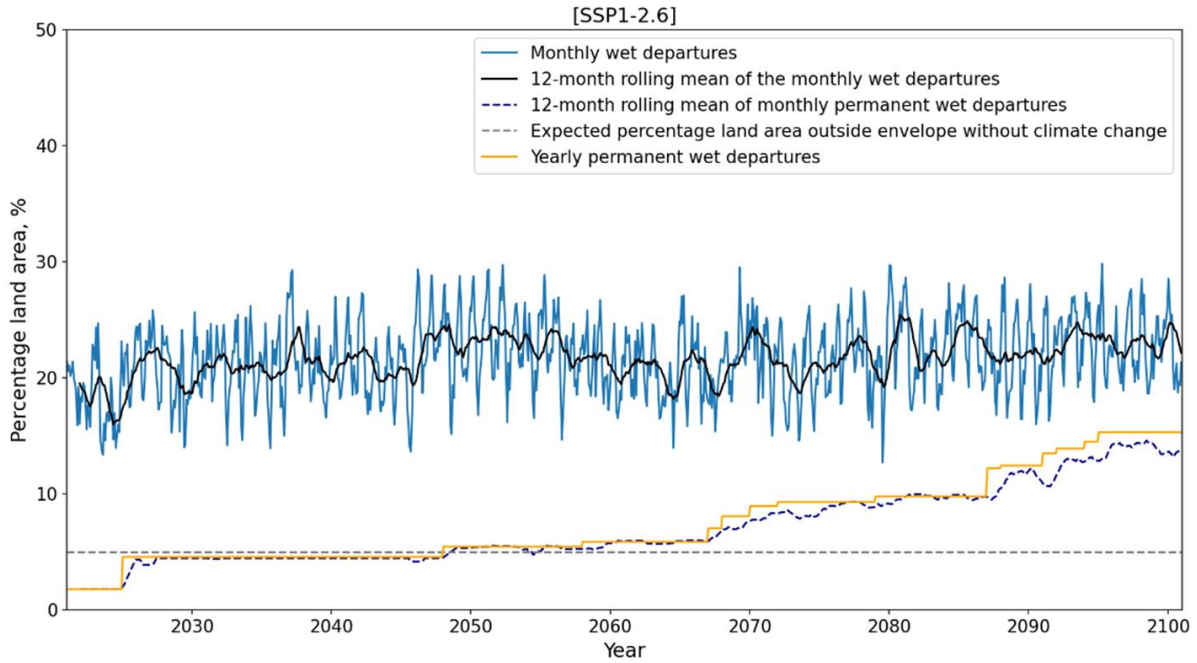

**Figure S11.** The changes in the percentage of the land area in each SSP1-2.6 with wet departure. The expected percentage (5%) of land area outside the envelope (grey dotted line) is the land area that has higher total soil moisture content than the 95th percentile of the PiControl baseline even when climate was similar to pre-industrial conditions. The monthly wet departures are the land area where the monthly total soil moisture content exceeds the 95th percentile of the PiControl baseline. The 12-month rolling mean of monthly permanent wet departures is computed from the monthly wet departures that occur only after the time of emergence. The yearly permanent wet departure is the proportion of land area with a yearly total soil moisture content that exceeds the 95th percentile after the time of emergence. The graph is plotted with the ensemble medians.

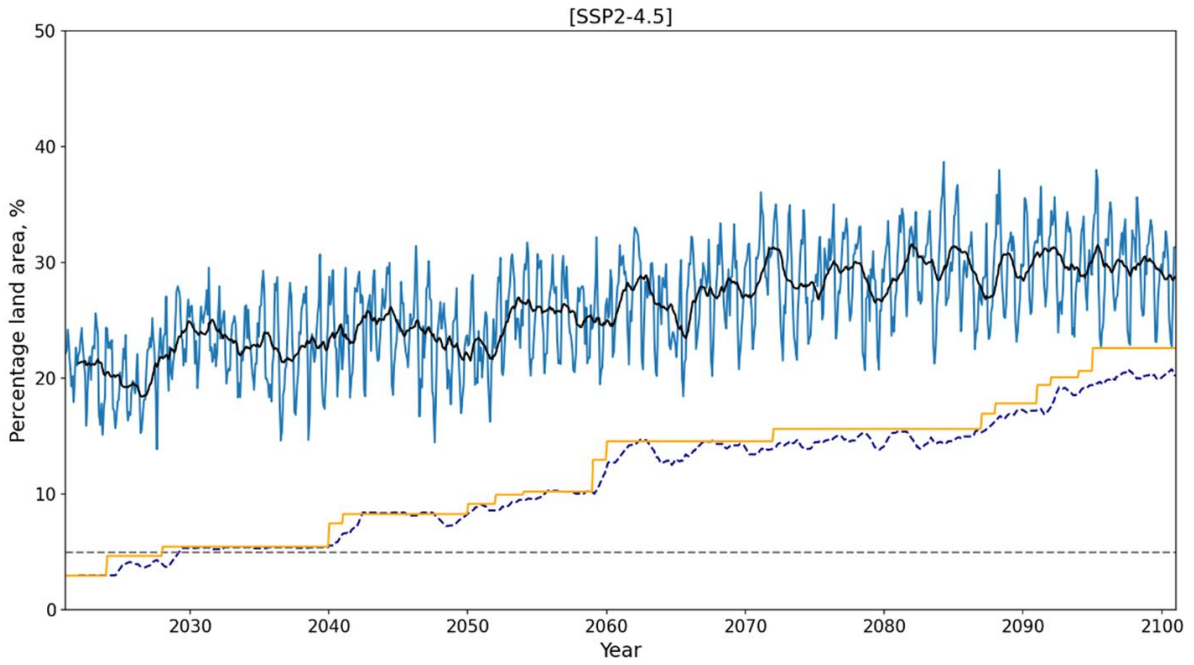

**Figure S12.** As in S11, but for the SSP2-4.5 scenario.

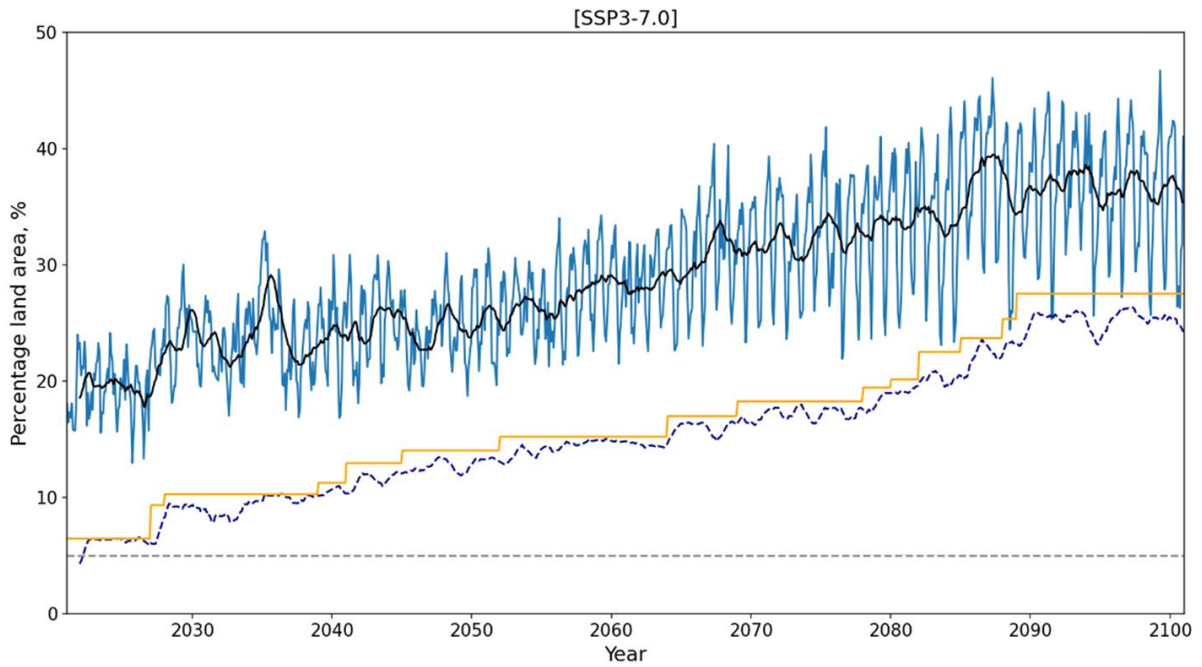

**Figure S13.** As in S11, but for the SSP3-7.0 scenario.

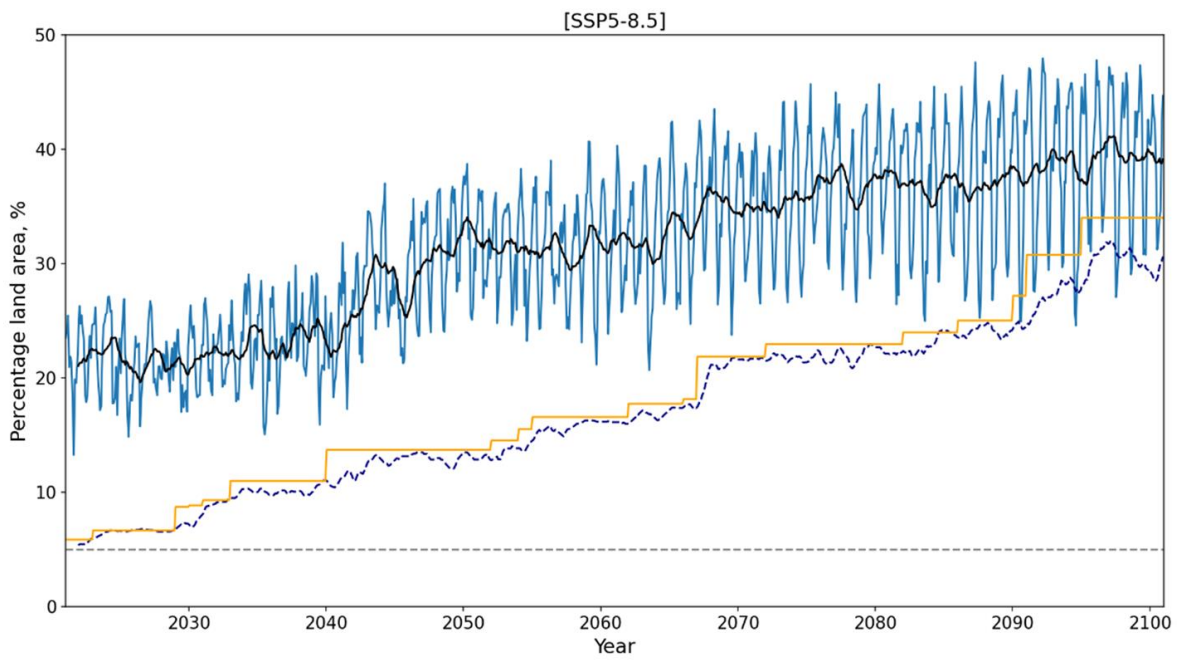

**Figure S14.** As in S11, but for the SSP5-8.5 scenario.

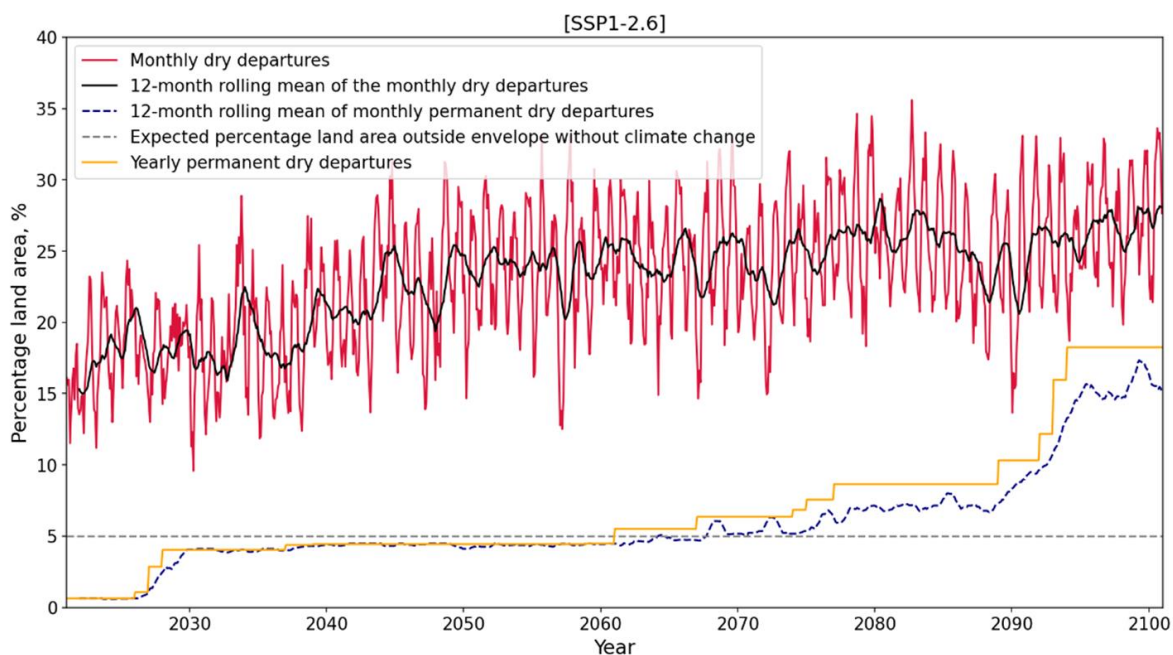

**Figure S15.** The changes in the percentage of the land area with dry departure in SSP1-2.6. The expected percentage (5 %) of land area outside the envelope (grey dotted line) is the land area that has lower total soil moisture content than the 5th percentile of the PiControl baseline even when climate was similar to pre-industrial conditions. The monthly dry departures are the land area where the monthly total soil moisture content is less than the 5th percentile of the PiControl baseline. The 12-month rolling mean of monthly permanent dry departures is computed from the monthly dry departures that occur only after the time of emergence. The yearly permanent dry departure is the proportion of land area with a yearly total soil moisture content that is less than the 5th percentile after the time of emergence. The graph is plotted with the ensemble medians.

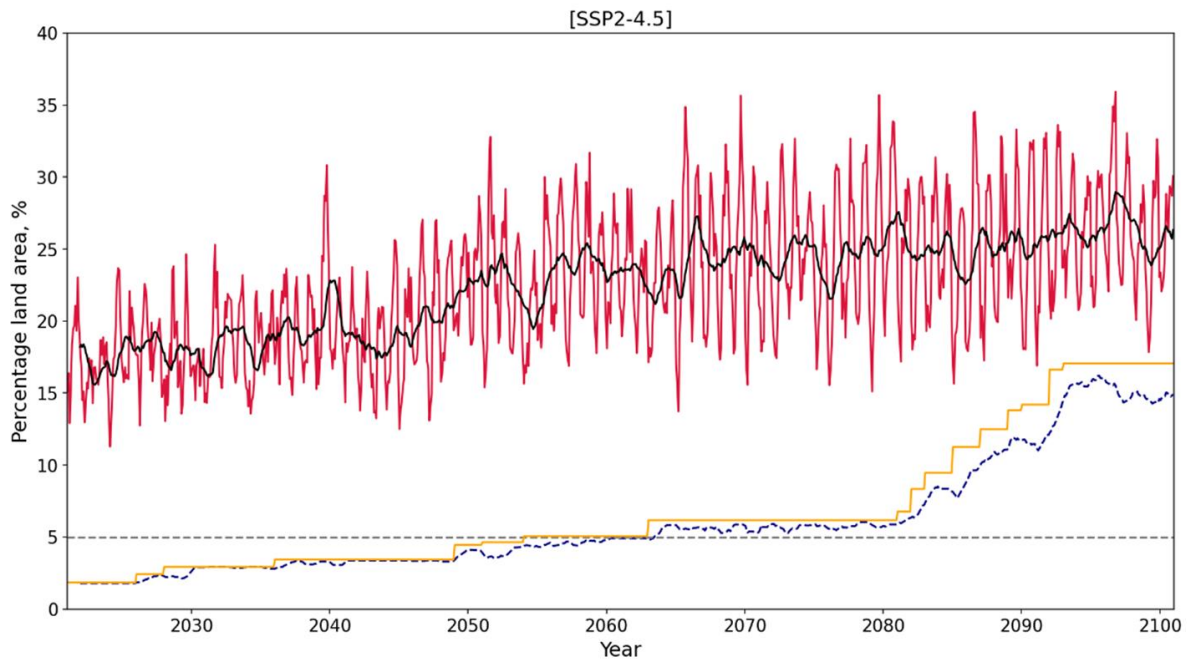

**Figure S16.** As in S15, but for the SSP2-4.5 scenario.

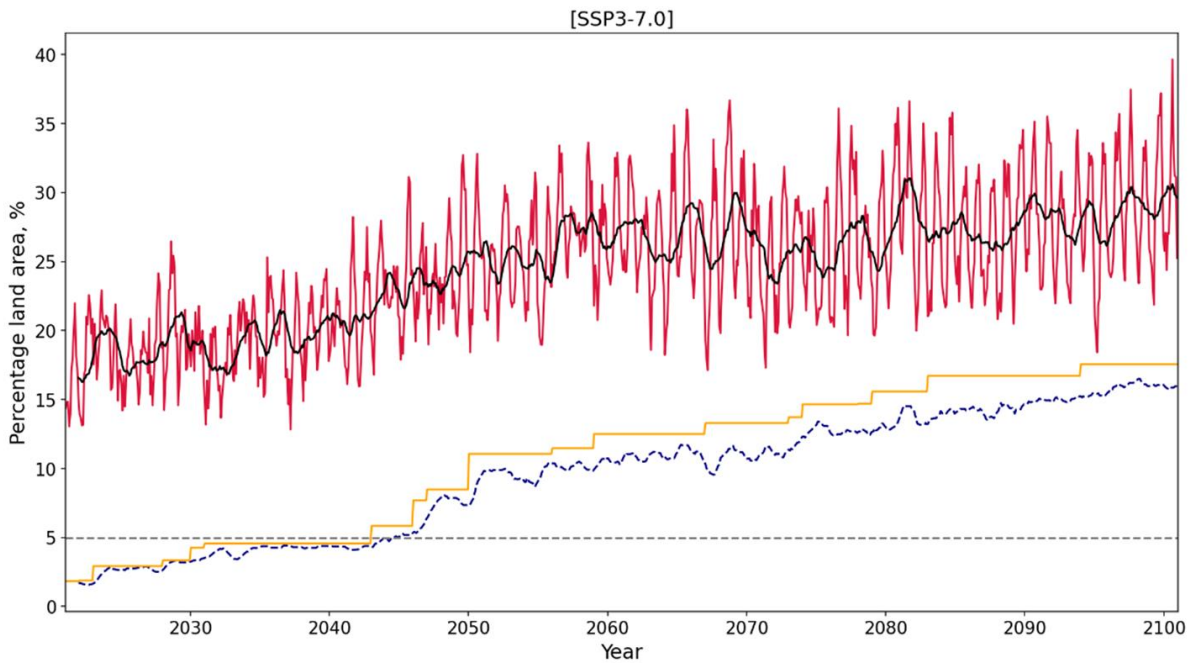

**Figure S17.** As in S15, but for the SSP3-7.0 scenario.



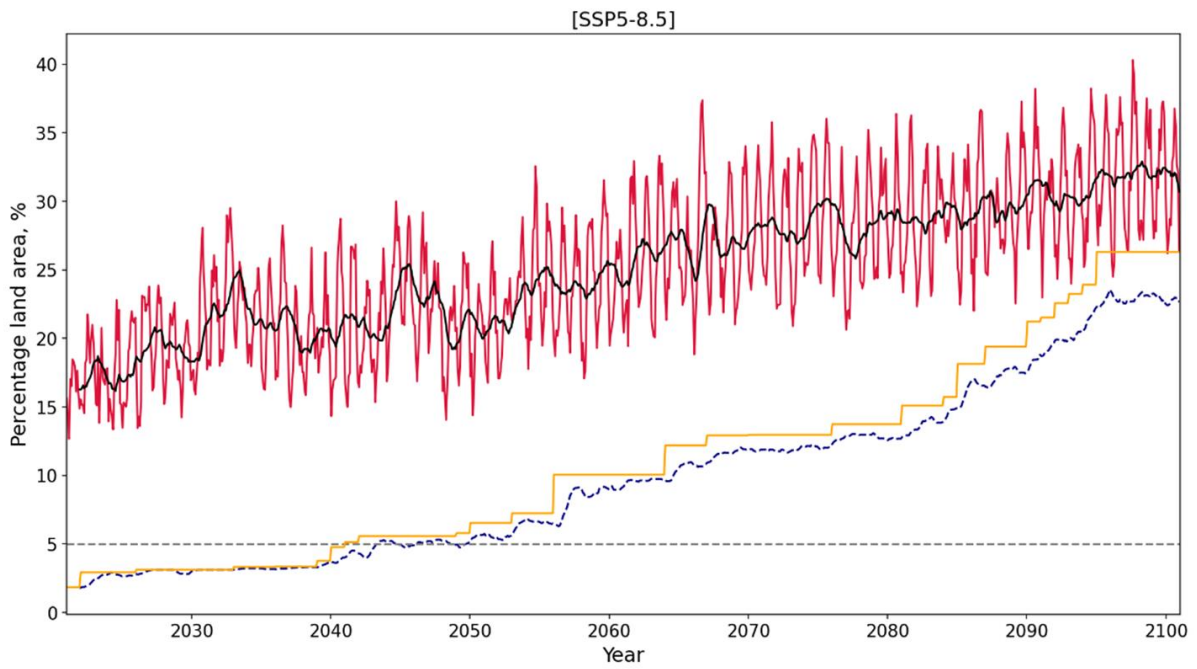

**Figure S18.** As in S15, but for the SSP5-8.5 scenario.

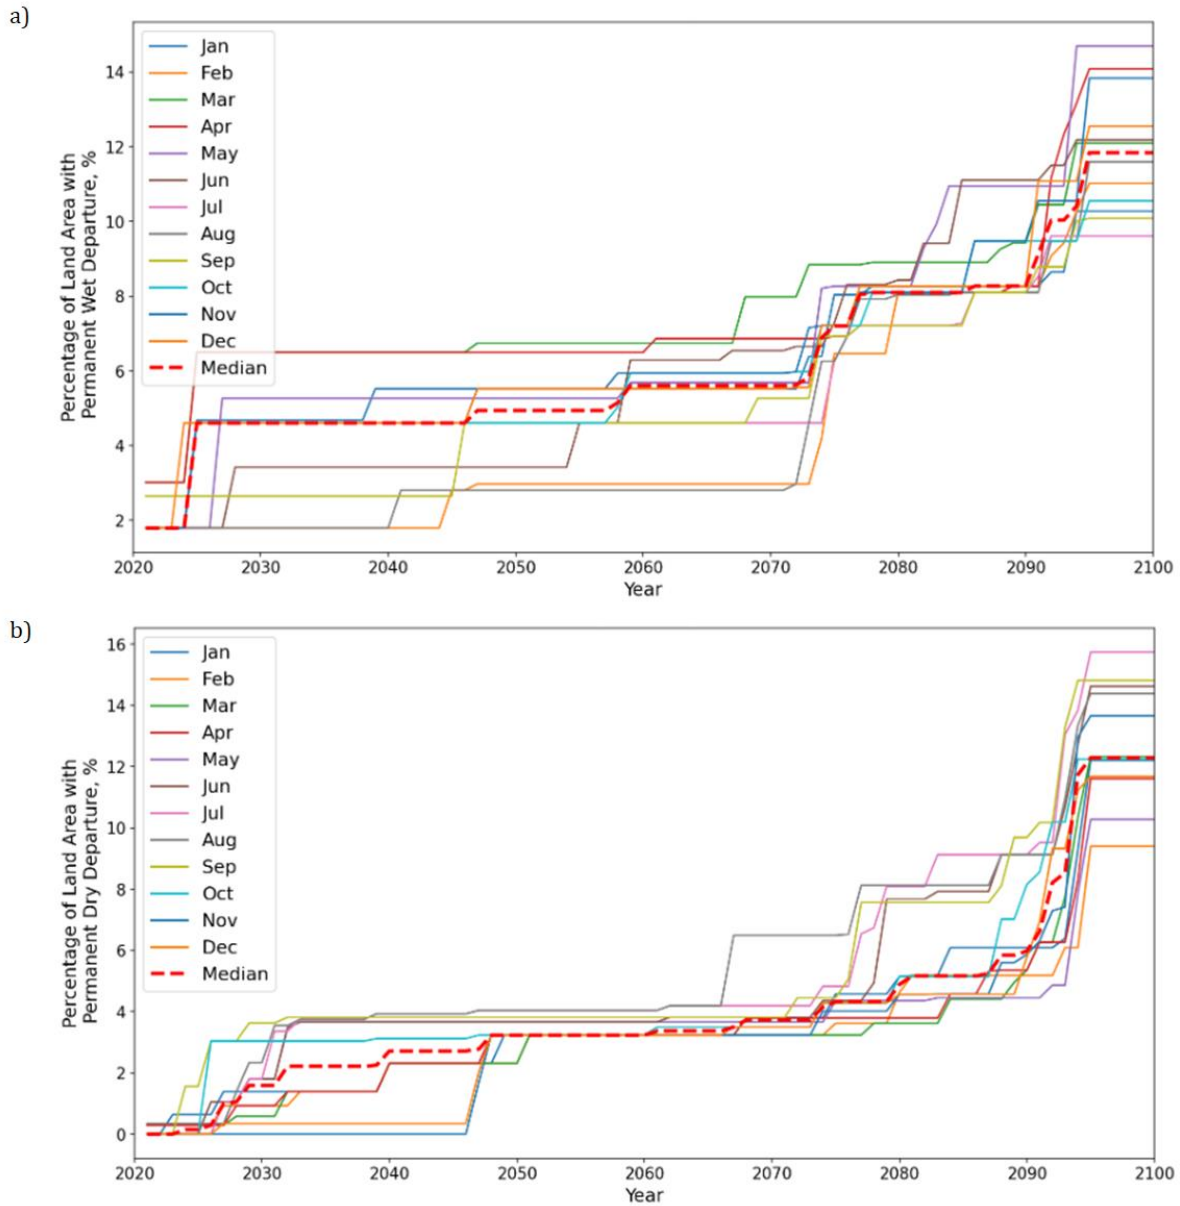

**Figure S19. (a)** Land area with permanent wet departure of soil moisture in each month across 2021-2100 for the SSP1-2.6 scenario. **(b)** As in (a), but for dry departure.

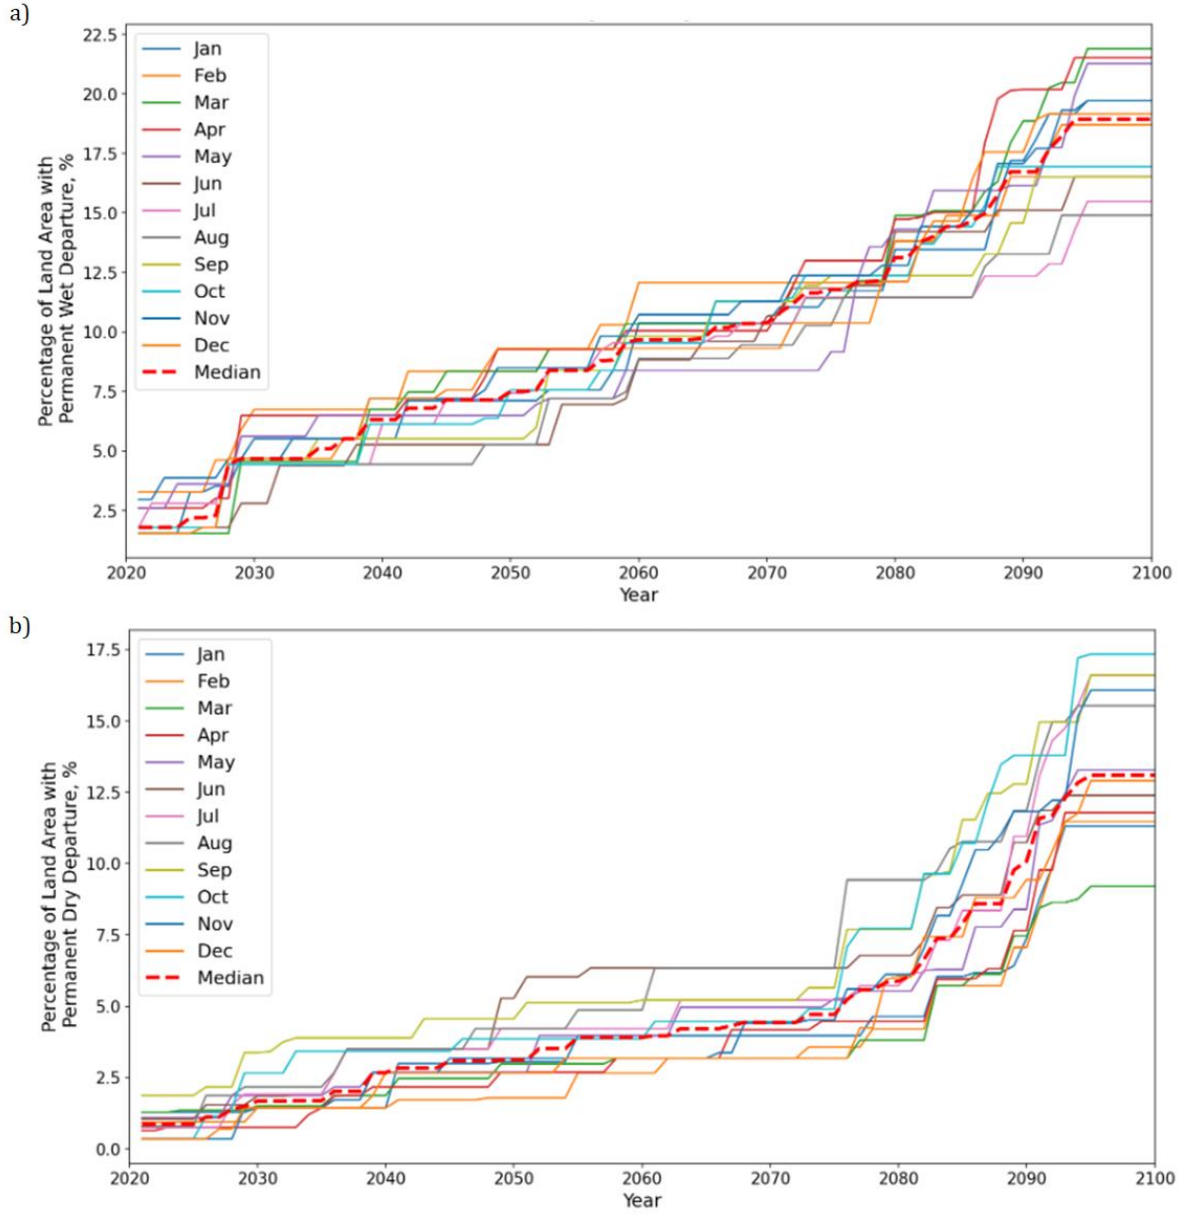

**Figure S20.** As in S19, but for the SSP2-4.5 scenario.

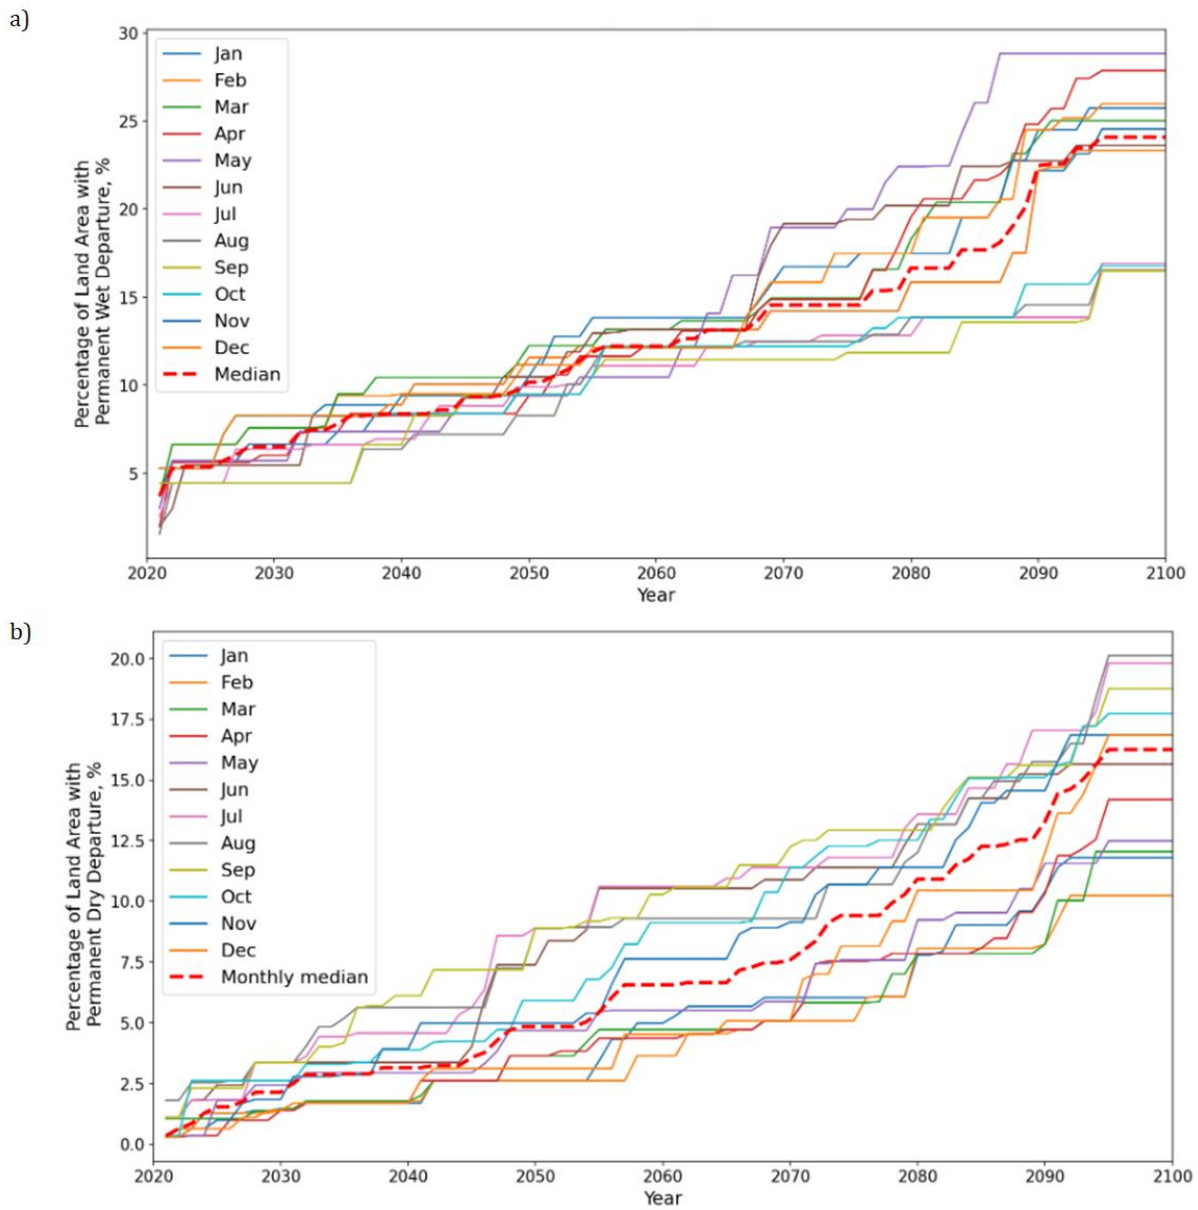

**Figure S21.** As in S19, but for the SSP3-7.0 scenario.

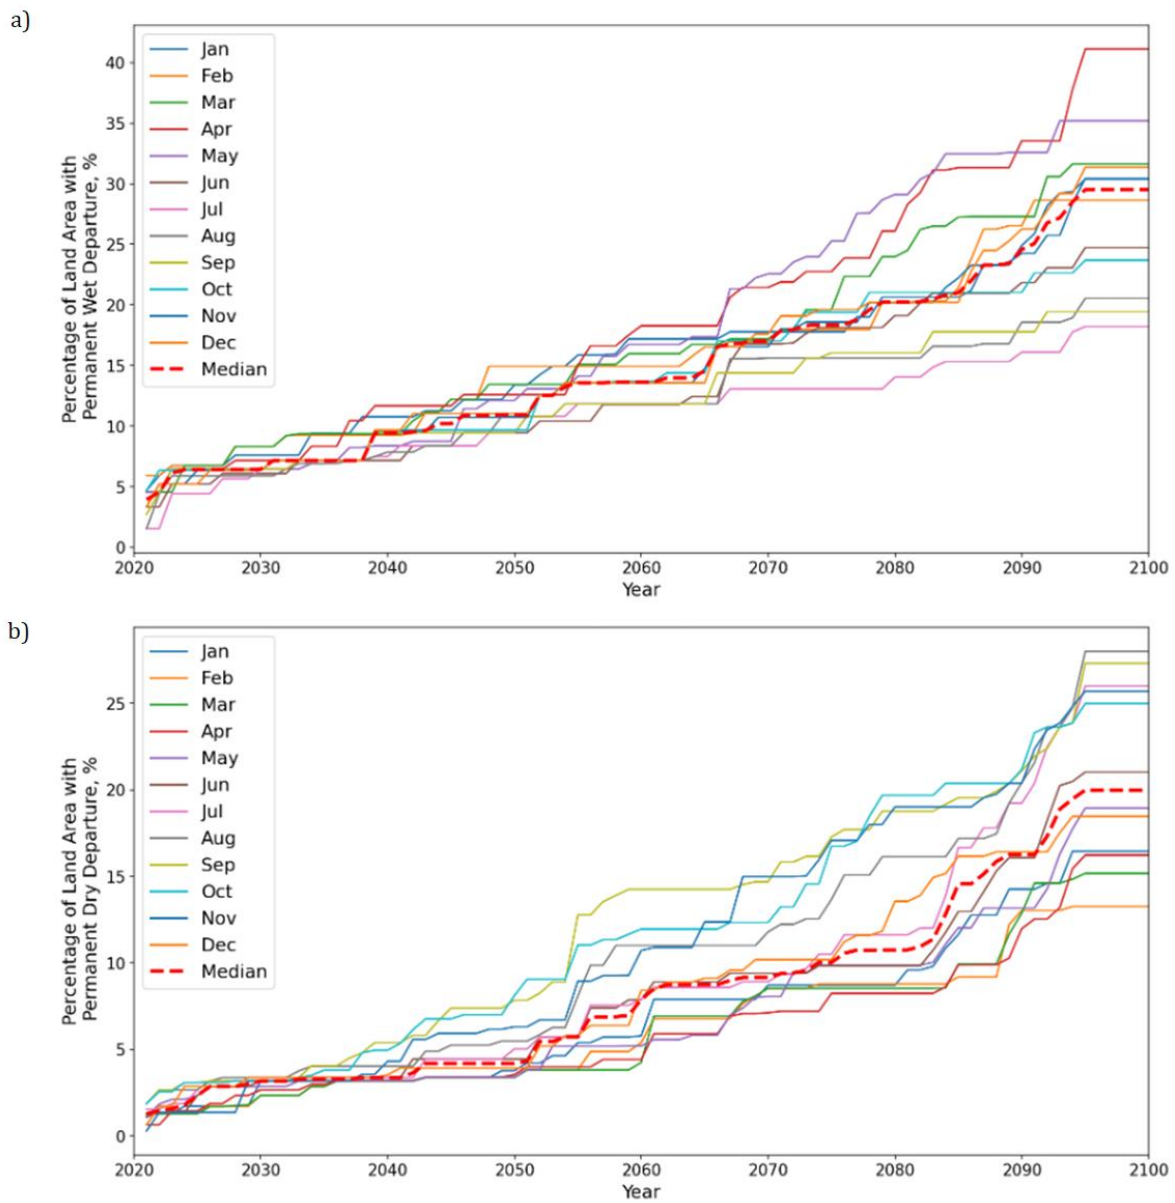

**Figure S22.** As in S19, but for the SSP5-8.5 scenario.

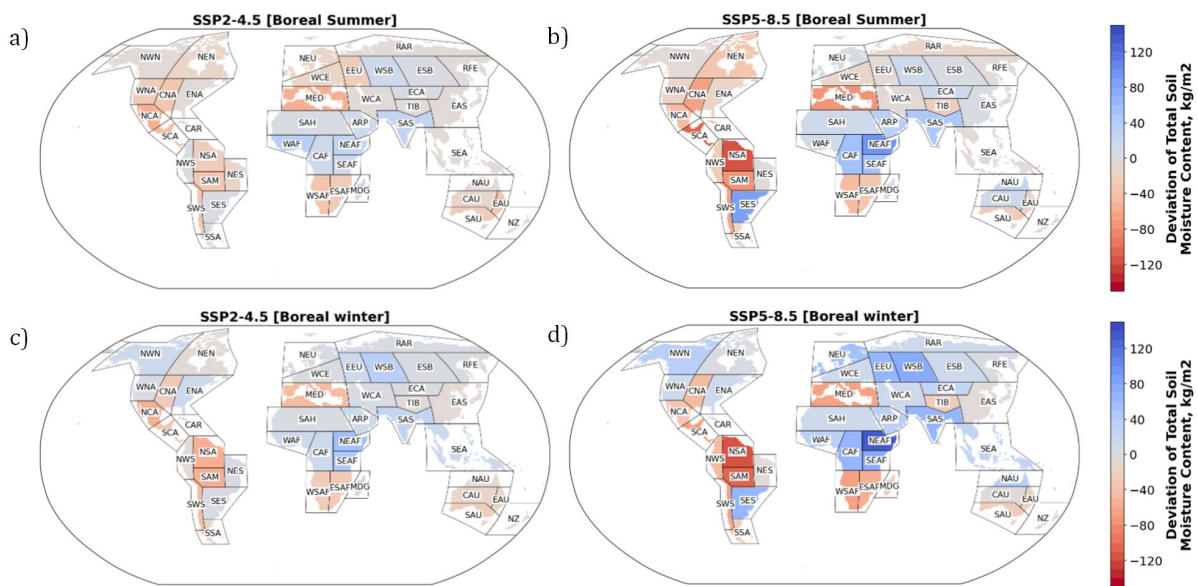

**Figure S23.** The deviation of the seasonal mean total soil moisture content (values shown in the maps are the ensemble median) in 2100 of SSP2-4.5 and SSP5-8.5 from the PiControl scenario.

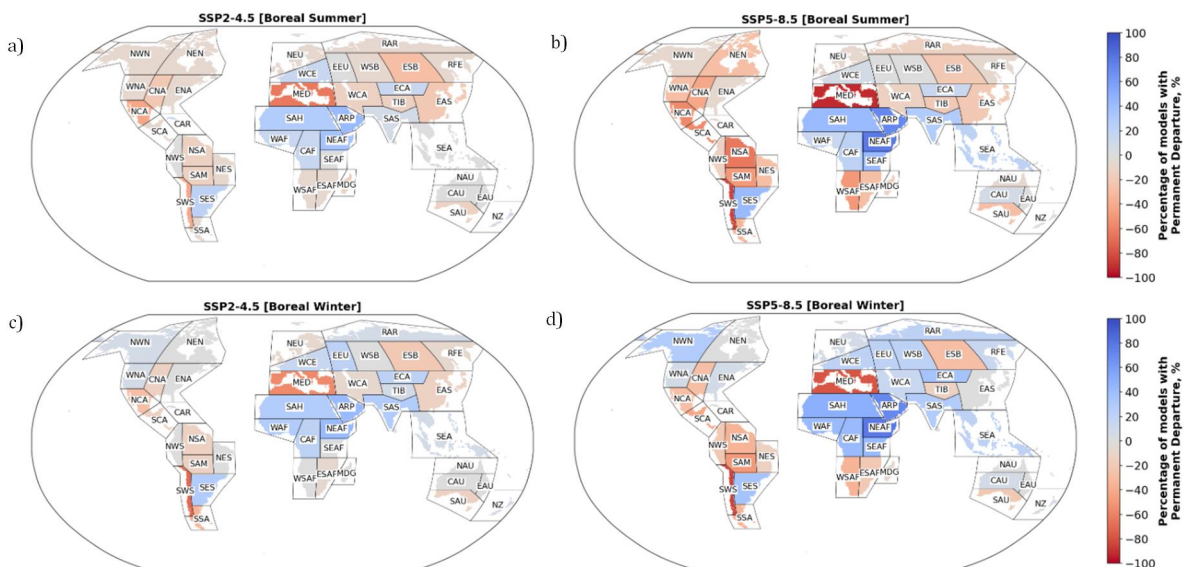

**Figure S24.** Percentage of models in SSP2-4.5 and SSP5-8.5 that show a permanent departure from the PiControl baseline in different seasons in 2100.

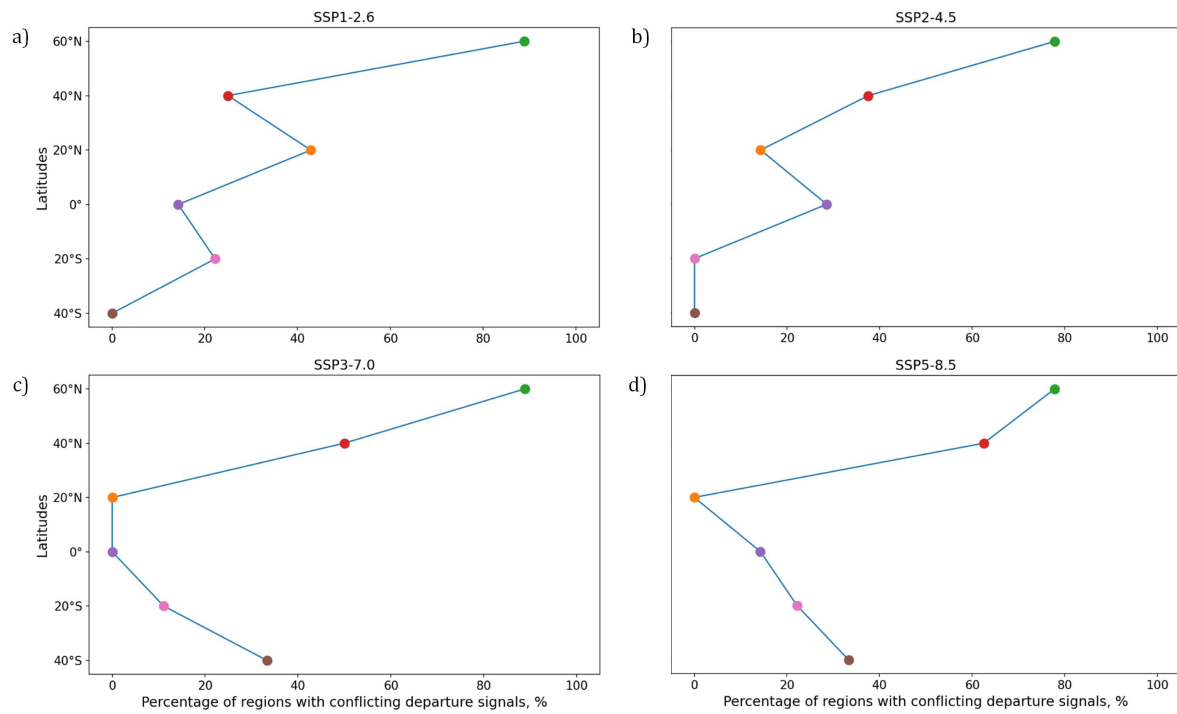

**Figure S25.** Percentage of regions that show conflicting wet and dry departure signals among ESMs around different latitudes in each SSP scenario.

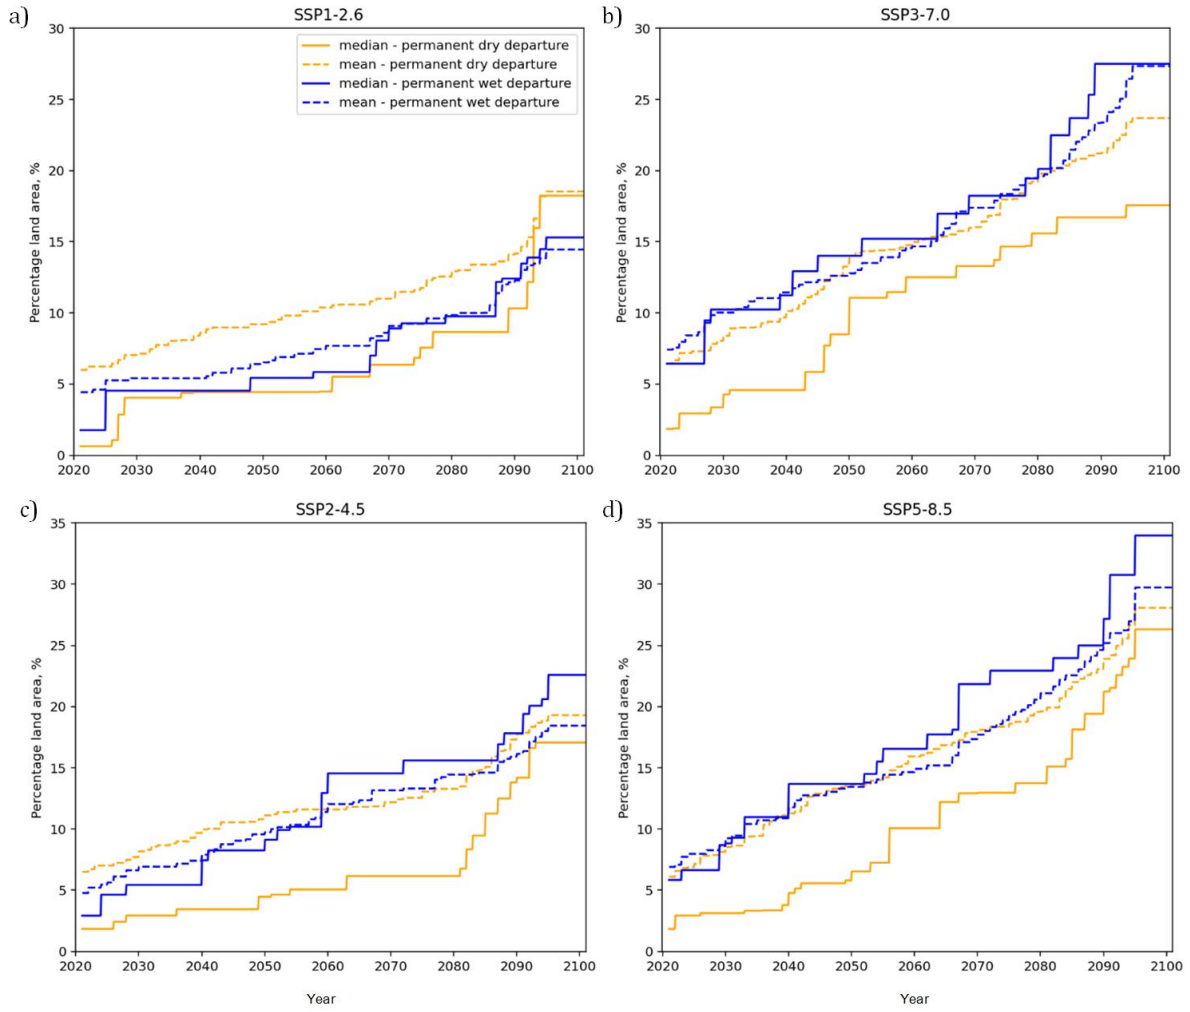

**Figure S26.** The differences between the ensemble mean and median land area with permanent departures for each SSP scenario.



**Table S1.** The member ID, version, and reference (hyperlink provided for more information) for the soil moisture data of each ESM used to construct a multi-model ensemble in this study.

| ESM           | PiControl |           | Reference                  | SSP1-2.6  |           | SSP2-4.5  |           | SSP3-7.0  |           | SSP5-8.5  |           | Reference               |
|---------------|-----------|-----------|----------------------------|-----------|-----------|-----------|-----------|-----------|-----------|-----------|-----------|-------------------------|
|               | Member ID | Version   |                            | Member ID | Version   |                         |
| ACCESS-CM2    | r1i1p1f1  | v20191112 | Dix et al. (2019)          | r1i1p1f1  | v20191108 | r1i1p1f1  | v20191108 | r3i1p1f1  | v20200428 | r1i1p1f1  | v20191108 | Dix et al. (2019)       |
| CanESM5       | r1i1p2f1  | v20190429 | Swart et al. (2019)        | r8i1p1f1  | v20190429 | r8i1p1f1  | v20190306 | r8i1p1f1  | v20190306 | r8i1p1f1  | v20190306 | Swart et al. (2019)     |
| CESM2         | r1i1p1f1  | v20190320 | Danabasoglu et al. (2019)  | r10i1p1f1 | v20200528 | r10i1p1f1 | v20200528 | r4i1p1f1  | v20200528 | r1i1p1f1  | v20200528 | Danabasoglu (2019)      |
| CESM2-WACCM   | r1i1p1f1  | v20190320 | Danabasoglu et al. (2019)  | r1i1p1f1  | v20190815 | r1i1p1f1  | v20190815 | r1i1p1f1  | v20190815 | r1i1p1f1  | v20190815 | Danabasoglu (2019)      |
| CNRM-CM6-1    | r1i1p1f2  | v20180814 | Voltaire (2018)            | r1i1p1f2  | v20190219 | r1i1p1f2  | v20190219 | r2i1p1f2  | v20190410 | r1i1p1f2  | v20190219 | Voltaire (2018)         |
| CNRM-ESM2-1   | r1i1p1f2  | v20181115 | Seferian (2018)            | r1i1p1f2  | v20190328 | r1i1p1f2  | v20190328 | r1i1p1f2  | v20191021 | r5i1p1f2  | v20190410 | Voltaire (2018)         |
| EC-Earth3     | r1i1p1f1  | v20190712 | EC-Earth (2019)            | r13i1p1f1 | v20200201 | r1i1p1f1  | v20200201 | r4i1p1f1  | v20200425 | r1i1p1f1  | v20190928 | EC-Earth (2019)         |
| EC-Earth3-Veg | r1i1p1f1  | v20190619 | EC-Earth (2019)            | r1i1p1f1  | v20190629 | r1i1p1f1  | v20190629 | r3i1p1f1  | v20200515 | r1i1p1f1  | v20190629 | EC-Earth (2019)         |
| GFDL-ESM4     | r1i1p1f1  | v20180701 | Krasting et al. (2018)     | r1i1p1f1  | v20180701 | r1i1p1f1  | v20180701 | r1i1p1f1  | v20180701 | r1i1p1f1  | v20180701 | John et al. (2018)      |
| IPSL-CM6A-LR  | r1i2p1f1  | v20190319 | Boucher et al. (2018)      | r2i1p1f1  | v20190410 | r1i1p1f1  | v20190119 | r14i1p1f1 | v20191122 | r1i1p1f1  | v20190903 | Boucher et al. (2018)   |
| MIROC6        | r1i1p1f1  | v20190311 | Tatebe and Watanabe (2018) | r1i1p1f1  | v20190627 | r3i1p1f1  | v20190627 | r1i1p1f1  | v20190627 | r2i1p1f1  | v20190627 | Shiogama et al. (2019)  |
| MIROC-ES2L    | r1i1p1f2  | v20190823 | Hajima et al. (2019)       | r1i1p1f2  | v20190823 | r1i1p1f2  | v20190823 | r1i1p1f2  | v20190823 | r1i1p1f2  | v20190823 | Tachiri et al. (2019)   |
| MPI-ESM1-2-HR | r1i1p1f1  | v20190710 | Jungclauss et al. (2019)   | r1i1p1f1  | v20190710 | r2i1p1f1  | v20190710 | r7i1p1f1  | v20190710 | r1i1p1f1  | v20190710 | Schupfner et al. (2019) |
| UKESM1-0-LL   | r1i1p1f2  | v20190715 | Tang et al. (2019)         | r1i1p1f2  | v20190708 | r1i1p1f2  | v20190715 | r6i1p1f2  | v20201014 | r1i1p1f2  | v20190726 | Good et al. (2019)      |

Table S2: Time of emergence (TOE) of the regional total soil moisture content for each ESM in SSP1-2.6. Negative signs are introduced to the number of models with a dry departure (in which the total soil moisture is permanently lower than the 5th percentile in PiControl scenario). The net number of model is the sum of models with a dry departure and models with a wet departure in each climate region. These tables are also available as a data file: "Supplement-Tables S1-S12.xlsx".

| Regions | ACCESS-<br>CM2 | CanESM5 | CESM2 | CESM2-<br>WACCM | CNRM-<br>CM6-<br>I | CNRM-<br>ESM2-<br>I | EC-<br>Earth3 | EC-<br>Earth3-<br>Veg | GFDL-<br>ESM4 | IPSL-<br>CM6A-<br>LR | MIROC6 | MIROC-<br>ES2L | MPI-<br>ESM1-<br>2-HR | UKESM1-<br>0-LL | Number<br>of models<br>with TOE | Net Num-<br>ber<br>of<br>Models |
|---------|----------------|---------|-------|-----------------|--------------------|---------------------|---------------|-----------------------|---------------|----------------------|--------|----------------|-----------------------|-----------------|---------------------------------|---------------------------------|
| NWN     | 0              | 0       | 2045  | 2021            | 0                  | 0                   | 0             | 2098                  | 2021          | 0                    | 0      | 2048           | 0                     | 0               | 4                               | -1                              |
|         | 2035           | 2021    | 0     | 0               | 2053               | 2021                | 0             | 0                     | 0             | 0                    | 0      | 0              | 0                     | 2021            | -5                              |                                 |
| NEN     | 0              | 0       | 2021  | 2021            | 0                  | 0                   | 0             | 0                     | 2021          | 0                    | 0      | 0              | 0                     | 0               | 3                               | -1                              |
|         | 2027           | 2100    | 0     | 0               | 2021               | 2021                | 0             | 0                     | 0             | 0                    | 2098   | 0              | 0                     | 2021            | -4                              |                                 |
| WNA     | 0              | 0       | 0     | 0               | 0                  | 0                   | 0             | 0                     | 2021          | 0                    | 0      | 0              | 0                     | 0               | 1                               | 0                               |
|         | 2100           | 2099    | 2098  | 0               | 2100               | 2099                | 0             | 2092                  | 0             | 0                    | 0      | 0              | 0                     | 0               | -1                              |                                 |
| CNA     | 0              | 0       | 0     | 0               | 0                  | 0                   | 2099          | 0                     | 2029          | 0                    | 0      | 0              | 0                     | 0               | 1                               | -2                              |
|         | 0              | 2100    | 2098  | 0               | 0                  | 2021                | 0             | 2093                  | 0             | 2100                 | 2052   | 0              | 0                     | 0               | -3                              |                                 |
| ENA     | 0              | 0       | 0     | 2100            | 0                  | 0                   | 0             | 0                     | 2097          | 0                    | 0      | 0              | 0                     | 0               | 0                               | -1                              |
|         | 0              | 2100    | 0     | 0               | 2083               | 0                   | 0             | 0                     | 0             | 0                    | 0      | 0              | 0                     | 2100            | -1                              |                                 |
| NCA     | 0              | 0       | 0     | 0               | 0                  | 0                   | 0             | 0                     | 0             | 0                    | 0      | 0              | 0                     | 2099            | 0                               | -4                              |
|         | 0              | 0       | 0     | 0               | 0                  | 0                   | 2078          | 2080                  | 0             | 0                    | 2074   | 2021           | 0                     | 0               | -4                              |                                 |
| SCA     | 0              | 0       | 0     | 0               | 0                  | 0                   | 0             | 0                     | 0             | 0                    | 0      | 0              | 0                     | 0               | 0                               | 0                               |
|         | 0              | 0       | 0     | 2099            | 0                  | 2100                | 2097          | 2100                  | 2099          | 0                    | 0      | 0              | 2100                  | 0               | 0                               | 0                               |
| CAR     | 0              | 0       | 2100  | 0               | 0                  | 0                   | 2100          | 0                     | 0             | 0                    | 2085   | 2021           | 0                     | 0               | 2                               | 1                               |
|         | 0              | 0       | 0     | 0               | 0                  | 0                   | 0             | 0                     | 2099          | 0                    | 0      | 0              | 2075                  | 0               | -1                              |                                 |
| NWS     | 0              | 0       | 0     | 0               | 2100               | 0                   | 0             | 0                     | 0             | 0                    | 0      | 0              | 0                     | 0               | 0                               | -2                              |
|         | 0              | 2092    | 0     | 2096            | 0                  | 2099                | 0             | 2095                  | 0             | 0                    | 0      | 2098           | 0                     | 0               | -2                              |                                 |
| NSA     | 0              | 0       | 0     | 0               | 0                  | 0                   | 0             | 0                     | 0             | 0                    | 0      | 0              | 0                     | 0               | 0                               | -3                              |
|         | 2099           | 2094    | 2100  | 2099            | 0                  | 0                   | 2100          | 2096                  | 2092          | 0                    | 2089   | 2096           | 0                     | 2099            | -3                              |                                 |
| NES     | 0              | 0       | 0     | 0               | 0                  | 0                   | 0             | 0                     | 0             | 0                    | 0      | 0              | 0                     | 0               | 0                               | -1                              |
|         | 2100           | 0       | 0     | 0               | 0                  | 2021                | 0             | 0                     | 0             | 0                    | 0      | 0              | 0                     | 2100            | -1                              |                                 |
| SAM     | 0              | 0       | 0     | 0               | 0                  | 0                   | 0             | 0                     | 0             | 0                    | 0      | 0              | 0                     | 0               | 0                               | -3                              |
|         | 2099           | 2092    | 0     | 0               | 0                  | 2021                | 2100          | 2096                  | 2100          | 0                    | 2077   | 0              | 0                     | 2099            | -3                              |                                 |
| SWS     | 0              | 0       | 0     | 0               | 0                  | 0                   | 0             | 0                     | 0             | 0                    | 0      | 0              | 0                     | 0               | 0                               | -7                              |
|         | 2094           | 2037    | 2062  | 2094            | 0                  | 2021                | 2021          | 2032                  | 0             | 2100                 | 2099   | 0              | 2097                  | 0               | -7                              |                                 |
| SES     | 2097           | 0       | 2100  | 2096            | 0                  | 0                   | 0             | 0                     | 2021          | 2100                 | 2021   | 2021           | 0                     | 0               | 3                               | 2                               |
|         | 0              | 0       | 0     | 0               | 0                  | 2021                | 0             | 2098                  | 0             | 0                    | 0      | 0              | 0                     | 0               | -1                              |                                 |
| SSA     | 0              | 0       | 0     | 0               | 0                  | 0                   | 0             | 0                     | 2021          | 0                    | 0      | 0              | 0                     | 0               | 1                               | -1                              |
|         | 0              | 2099    | 0     | 0               | 0                  | 0                   | 2021          | 2068                  | 0             | 0                    | 2096   | 2099           | 0                     | 0               | -2                              |                                 |
| NEU     | 0              | 0       | 0     | 0               | 0                  | 0                   | 0             | 2100                  | 2067          | 0                    | 2050   | 0              | 0                     | 0               | 2                               | -1                              |
|         | 2030           | 2100    | 0     | 0               | 2021               | 2021                | 0             | 0                     | 0             | 0                    | 0      | 2099           | 0                     | 0               | -3                              |                                 |
| WCE     | 0              | 0       | 0     | 0               | 0                  | 0                   | 0             | 0                     | 2100          | 0                    | 0      | 2094           | 2099                  | 0               | 1                               | 1                               |
|         | 0              | 0       | 0     | 2100            | 0                  | 0                   | 2098          | 0                     | 0             | 0                    | 0      | 0              | 0                     | 0               | 0                               | 0                               |

Continuation of Table S2

|      |      |      |      |      |      |      |      |      |      |      |      |      |      |      |     |      |      |      |   |   |   |    |     |
|------|------|------|------|------|------|------|------|------|------|------|------|------|------|------|-----|------|------|------|---|---|---|----|-----|
| EEU  | 0    | 0    | 0    | 0    | 0    | 0    | 0    | 0    | 0    | 0    | 0    | 0    | 0    | 0    | 0   | 2021 | 2081 | 2021 | 0 | 0 | 0 | 2  | -1  |
|      | 2051 | 0    | 2098 | 2100 | 2068 | 2021 | 0    | 0    | 0    | 0    | 0    | 0    | 0    | 0    | 0   | 0    | 0    | 0    | 0 | 0 | 0 | -3 |     |
| MED  | 0    | 0    | 0    | 0    | 0    | 0    | 0    | 0    | 0    | 0    | 0    | 0    | 0    | 0    | 0   | 0    | 0    | 0    | 0 | 0 | 0 | 0  | -10 |
|      | 2095 | 2100 | 2040 | 2048 | 2098 | 2021 | 2026 | 2083 | 2067 | 2087 | 2032 | 2021 | 0    | 2096 | -10 |      |      |      |   |   |   |    |     |
| SAH  | 0    | 2021 | 0    | 0    | 0    | 0    | 2025 | 2088 | 0    | 2070 | 0    | 0    | 0    | 0    | 4   | -1   |      |      |   |   |   |    |     |
|      | 2099 | 0    | 0    | 2091 | 0    | 0    | 0    | 0    | 2094 | 0    | 2093 | 2076 | 0    | 2071 | -5  |      |      |      |   |   |   |    |     |
| WAF  | 0    | 0    | 0    | 0    | 0    | 0    | 2025 | 2067 | 0    | 2099 | 0    | 0    | 2092 | 2100 | 3   | 2    |      |      |   |   |   |    |     |
|      | 0    | 0    | 0    | 0    | 0    | 2021 | 0    | 0    | 0    | 0    | 0    | 0    | 0    | 0    | -1  |      |      |      |   |   |   |    |     |
| CAF  | 0    | 0    | 0    | 0    | 0    | 0    | 2095 | 2091 | 0    | 2060 | 0    | 0    | 2021 | 0    | 4   | 4    |      |      |   |   |   |    |     |
|      | 0    | 2100 | 0    | 0    | 0    | 0    | 0    | 0    | 0    | 0    | 0    | 0    | 0    | 0    | 0   | 0    |      |      |   |   |   |    |     |
| NEAF | 2094 | 0    | 2023 | 2021 | 0    | 0    | 2095 | 2091 | 0    | 2087 | 2021 | 0    | 2091 | 2095 | 9   | 9    |      |      |   |   |   |    |     |
|      | 0    | 0    | 0    | 0    | 0    | 2099 | 0    | 0    | 0    | 0    | 0    | 0    | 0    | 0    | 0   | 0    |      |      |   |   |   |    |     |
| SEAF | 0    | 2099 | 2100 | 2097 | 0    | 0    | 2100 | 2100 | 0    | 2099 | 0    | 0    | 0    | 0    | 0   | 0    |      |      |   |   |   |    |     |
|      | 0    | 0    | 0    | 0    | 0    | 0    | 0    | 0    | 0    | 0    | 0    | 0    | 0    | 0    | 0   | 0    |      |      |   |   |   |    |     |
| WSAF | 0    | 0    | 0    | 0    | 0    | 0    | 0    | 0    | 0    | 0    | 0    | 0    | 0    | 0    | 0   | -1   |      |      |   |   |   |    |     |
|      | 2096 | 2098 | 2100 | 2096 | 0    | 2100 | 2099 | 2100 | 0    | 0    | 2093 | 0    | 0    | 0    | -1  |      |      |      |   |   |   |    |     |
| ESAF | 0    | 0    | 0    | 0    | 0    | 0    | 0    | 0    | 0    | 0    | 0    | 0    | 0    | 0    | 0   | -1   |      |      |   |   |   |    |     |
|      | 2100 | 0    | 0    | 0    | 0    | 2100 | 0    | 0    | 0    | 0    | 2094 | 0    | 0    | 0    | -1  |      |      |      |   |   |   |    |     |
| MDG  | 0    | 0    | 0    | 2098 | 0    | 0    | 0    | 0    | 2095 | 2097 | 2100 | 2021 | 0    | 0    | 2   | 1    |      |      |   |   |   |    |     |
|      | 0    | 0    | 0    | 0    | 0    | 2021 | 0    | 0    | 0    | 0    | 0    | 0    | 0    | 0    | -1  |      |      |      |   |   |   |    |     |
| RAR  | 0    | 0    | 2042 | 2067 | 0    | 0    | 2069 | 2087 | 2021 | 0    | 2100 | 0    | 2100 | 0    | 5   | 1    |      |      |   |   |   |    |     |
|      | 0    | 2059 | 0    | 0    | 2021 | 2021 | 0    | 0    | 0    | 0    | 0    | 0    | 0    | 0    | -4  |      |      |      |   |   |   |    |     |
| WSB  | 0    | 2099 | 0    | 0    | 0    | 0    | 2096 | 2096 | 2052 | 0    | 2079 | 2076 | 0    | 0    | 3   | 0    |      |      |   |   |   |    |     |
|      | 2089 | 0    | 2098 | 0    | 2041 | 2022 | 0    | 0    | 0    | 0    | 0    | 0    | 0    | 0    | -3  |      |      |      |   |   |   |    |     |
| ESB  | 0    | 2099 | 0    | 0    | 0    | 0    | 2096 | 2058 | 0    | 0    | 2086 | 0    | 0    | 0    | 2   | -3   |      |      |   |   |   |    |     |
|      | 2033 | 0    | 0    | 0    | 2056 | 2021 | 0    | 0    | 0    | 2099 | 0    | 2039 | 0    | 2021 | -5  |      |      |      |   |   |   |    |     |
| RFE  | 0    | 0    | 2076 | 0    | 0    | 0    | 2098 | 2096 | 2051 | 0    | 0    | 0    | 0    | 0    | 2   | -2   |      |      |   |   |   |    |     |
|      | 2028 | 0    | 0    | 0    | 2021 | 2021 | 0    | 0    | 0    | 0    | 0    | 0    | 0    | 0    | -4  |      |      |      |   |   |   |    |     |
| WCA  | 0    | 0    | 2100 | 0    | 0    | 0    | 2100 | 0    | 0    | 0    | 2099 | 0    | 2100 | 0    | 0   | -1   |      |      |   |   |   |    |     |
|      | 0    | 0    | 0    | 0    | 2098 | 2099 | 0    | 0    | 2093 | 0    | 0    | 2100 | 0    | 0    | -1  |      |      |      |   |   |   |    |     |
| ECA  | 2041 | 0    | 0    | 0    | 0    | 0    | 2092 | 0    | 0    | 0    | 2021 | 2089 | 0    | 0    | 4   | 2    |      |      |   |   |   |    |     |
|      | 0    | 2075 | 0    | 0    | 0    | 0    | 0    | 0    | 2021 | 0    | 0    | 0    | 0    | 0    | -2  |      |      |      |   |   |   |    |     |
| TIB  | 0    | 0    | 2088 | 2021 | 0    | 2093 | 0    | 2090 | 2021 | 0    | 0    | 0    | 2100 | 0    | 5   | 2    |      |      |   |   |   |    |     |
|      | 2042 | 2097 | 0    | 0    | 2021 | 0    | 0    | 0    | 0    | 0    | 0    | 0    | 0    | 0    | -3  |      |      |      |   |   |   |    |     |
| EAS  | 0    | 2099 | 0    | 0    | 0    | 0    | 0    | 0    | 0    | 0    | 0    | 0    | 0    | 0    | 0   | -3   |      |      |   |   |   |    |     |
|      | 0    | 0    | 0    | 0    | 2099 | 2080 | 2094 | 2094 | 0    | 2100 | 0    | 0    | 0    | 0    | 0   | 0    | -3   |      |   |   |   |    |     |
| ARP  | 0    | 2072 | 2021 | 2021 | 0    | 0    | 2091 | 2068 | 0    | 2097 | 0    | 0    | 0    | 0    | 5   | 4    |      |      |   |   |   |    |     |
|      | 0    | 0    | 0    | 0    | 0    | 0    | 0    | 0    | 2061 | 0    | 0    | 0    | 0    | 0    | -1  |      |      |      |   |   |   |    |     |
| SAS  | 0    | 0    | 2086 | 2055 | 0    | 0    | 0    | 0    | 0    | 0    | 2087 | 0    | 2087 | 0    | 4   | 3    |      |      |   |   |   |    |     |
|      | 0    | 0    | 0    | 0    | 0    | 2021 | 0    | 0    | 0    | 0    | 0    | 0    | 0    | 0    | -1  |      |      |      |   |   |   |    |     |
| SEA  | 0    | 0    | 0    | 0    | 2097 | 0    | 0    | 0    | 0    | 0    | 2100 | 0    | 2099 | 0    | 0   | -1   |      |      |   |   |   |    |     |
|      | 0    | 0    | 0    | 0    | 0    | 2093 | 2099 | 2100 | 0    | 0    | 0    | 0    | 0    | 0    | 0   | -1   |      |      |   |   |   |    |     |

| Continuation of Table S2 |      |      |   |   |   |   |   |   |   |      |   |   |   |   |   |      |    |
|--------------------------|------|------|---|---|---|---|---|---|---|------|---|---|---|---|---|------|----|
|                          | 0    | 0    | 0 | 0 | 0 | 0 | 0 | 0 | 0 | 0    | 0 | 0 | 0 | 0 | 0 | 0    | 0  |
| NAU                      | 0    | 0    | 0 | 0 | 0 | 0 | 0 | 0 | 0 | 0    | 0 | 0 | 0 | 0 | 0 | 0    | 0  |
|                          | 0    | 0    | 0 | 0 | 0 | 0 | 0 | 0 | 0 | 0    | 0 | 0 | 0 | 0 | 0 | 0    | 0  |
| CAU                      | 0    | 0    | 0 | 0 | 0 | 0 | 0 | 0 | 0 | 0    | 0 | 0 | 0 | 0 | 0 | 0    | 0  |
|                          | 2099 | 2100 | 0 | 0 | 0 | 0 | 0 | 0 | 0 | 2028 | 0 | 0 | 0 | 0 | 0 | 0    | -1 |
| EAU                      | 0    | 0    | 0 | 0 | 0 | 0 | 0 | 0 | 0 | 0    | 0 | 0 | 0 | 0 | 0 | 0    | 0  |
|                          | 0    | 0    | 0 | 0 | 0 | 0 | 0 | 0 | 0 | 0    | 0 | 0 | 0 | 0 | 0 | 0    | 0  |
| SAU                      | 0    | 0    | 0 | 0 | 0 | 0 | 0 | 0 | 0 | 0    | 0 | 0 | 0 | 0 | 0 | 0    | 0  |
|                          | 0    | 0    | 0 | 0 | 0 | 0 | 0 | 0 | 0 | 0    | 0 | 0 | 0 | 0 | 0 | 0    | -3 |
| NZ                       | 0    | 0    | 0 | 0 | 0 | 0 | 0 | 0 | 0 | 0    | 0 | 0 | 0 | 0 | 0 | 0    | 0  |
|                          | 0    | 0    | 0 | 0 | 0 | 0 | 0 | 0 | 0 | 0    | 0 | 0 | 0 | 0 | 0 | 0    | 1  |
|                          | 0    | 0    | 0 | 0 | 0 | 0 | 0 | 0 | 0 | 2096 | 0 | 0 | 0 | 0 | 0 | 2098 | 0  |

End of TableS2

Table S3: As in S2, but for SSP2-4.5 scenario.

| Regions | ACCESS-<br>CM2 | CanESM5 | CESM2<br>WACCM | CESM2-<br>CM6-<br>I | CNRM-<br>CM6-<br>I | CNRM-<br>ESM2-<br>I | EC-<br>Earth3 | EC-<br>Earth3-<br>Veg | GFDL-<br>ESM4 | IPSL-<br>CM6A-<br>LR | MIROC6 | MIROC-<br>ES2L | MPI-<br>ESM1-<br>2-HR | UKESM1 - Number<br>of models<br>with TOE | Net Num-<br>ber<br>of<br>Models |
|---------|----------------|---------|----------------|---------------------|--------------------|---------------------|---------------|-----------------------|---------------|----------------------|--------|----------------|-----------------------|------------------------------------------|---------------------------------|
| NWN     | 0              | 0       | 2030           | 2022                | 0                  | 0                   | 0             | 0                     | 2021          | 0                    | 0      | 2026           | 2094                  | 0                                        | 5                               |
|         | 2040           | 2021    | 0              | 0                   | 2038               | 2021                | 0             | 0                     | 0             | 0                    | 0      | 0              | 0                     | 2021                                     | -5                              |
| NEN     | 0              | 0       | 2021           | 2021                | 0                  | 0                   | 0             | 0                     | 2021          | 2100                 | 0      | 2051           | 0                     | 0                                        | 4                               |
|         | 2028           | 2100    | 0              | 0                   | 2021               | 2021                | 0             | 0                     | 0             | 0                    | 0      | 0              | 0                     | 2021                                     | -4                              |
| WNA     | 0              | 0       | 0              | 0                   | 0                  | 0                   | 0             | 0                     | 2021          | 0                    | 0      | 0              | 2100                  | 2100                                     | 1                               |
|         | 0              | 0       | 2098           | 2100                | 0                  | 0                   | 0             | 2092                  | 0             | 0                    | 0      | 0              | 0                     | 0                                        | -1                              |
| CNA     | 0              | 0       | 0              | 0                   | 0                  | 0                   | 0             | 0                     | 2060          | 0                    | 0      | 0              | 2096                  | 0                                        | 1                               |
|         | 2100           | 0       | 0              | 0                   | 0                  | 2021                | 2093          | 2085                  | 0             | 0                    | 0      | 2052           | 0                     | 0                                        | -4                              |
| ENA     | 0              | 0       | 2100           | 0                   | 0                  | 0                   | 0             | 0                     | 0             | 0                    | 0      | 2099           | 0                     | 0                                        | 0                               |
|         | 2100           | 0       | 0              | 0                   | 2090               | 0                   | 0             | 0                     | 0             | 0                    | 0      | 0              | 0                     | 0                                        | -1                              |
| NCA     | 0              | 0       | 0              | 0                   | 0                  | 0                   | 0             | 0                     | 2100          | 0                    | 0      | 0              | 0                     | 0                                        | 0                               |
|         | 2100           | 0       | 2086           | 2085                | 2098               | 2069                | 2021          | 2051                  | 0             | 2100                 | 2032   | 2021           | 2100                  | 0                                        | -7                              |
| SCA     | 0              | 0       | 0              | 0                   | 0                  | 0                   | 0             | 0                     | 0             | 0                    | 0      | 0              | 0                     | 0                                        | 0                               |
|         | 0              | 2087    | 2098           | 2098                | 0                  | 0                   | 2086          | 2041                  | 2091          | 0                    | 2091   | 0              | 0                     | 2094                                     | -6                              |
| CAR     | 0              | 0       | 2100           | 2083                | 0                  | 0                   | 0             | 0                     | 0             | 0                    | 2021   | 2021           | 0                     | 0                                        | 3                               |
|         | 0              | 0       | 0              | 0                   | 0                  | 0                   | 2099          | 0                     | 0             | 0                    | 0      | 0              | 0                     | 2099                                     | 0                               |
| NWS     | 0              | 0       | 0              | 0                   | 0                  | 0                   | 0             | 0                     | 0             | 0                    | 2099   | 0              | 0                     | 0                                        | 0                               |
|         | 0              | 2087    | 0              | 2094                | 0                  | 0                   | 2099          | 0                     | 0             | 0                    | 0      | 2096           | 0                     | 0                                        | -2                              |
| NSA     | 0              | 0       | 0              | 0                   | 0                  | 0                   | 0             | 0                     | 0             | 0                    | 0      | 0              | 0                     | 0                                        | 0                               |
|         | 2096           | 2071    | 0              | 2100                | 0                  | 0                   | 2100          | 0                     | 0             | 2100                 | 2096   | 2050           | 0                     | 0                                        | -2                              |
| NES     | 0              | 0       | 2099           | 2100                | 0                  | 0                   | 0             | 0                     | 0             | 0                    | 0      | 0              | 0                     | 0                                        | 0                               |
|         | 0              | 0       | 0              | 0                   | 0                  | 2021                | 0             | 2100                  | 0             | 0                    | 2099   | 2100           | 0                     | 0                                        | -1                              |
| SAM     | 0              | 0       | 0              | 0                   | 0                  | 0                   | 0             | 0                     | 0             | 0                    | 0      | 0              | 0                     | 0                                        | 0                               |
|         | 2099           | 2035    | 0              | 2099                | 2095               | 2021                | 2100          | 2100                  | 2098          | 0                    | 0      | 2036           | 0                     | 0                                        | -4                              |
| SWS     | 0              | 0       | 0              | 0                   | 0                  | 0                   | 0             | 0                     | 0             | 0                    | 0      | 0              | 0                     | 0                                        | 0                               |
|         | 0              | 2029    | 2099           | 2090                | 2095               | 2022                | 2021          | 2021                  | 2099          | 2088                 | 2054   | 2084           | 2050                  | 0                                        | -10                             |
| SES     | 0              | 0       | 2078           | 2079                | 0                  | 0                   | 0             | 0                     | 2021          | 0                    | 2021   | 2021           | 0                     | 0                                        | 5                               |
|         | 0              | 2100    | 0              | 0                   | 0                  | 2021                | 0             | 0                     | 0             | 0                    | 0      | 0              | 0                     | 0                                        | -1                              |
| SSA     | 0              | 0       | 2096           | 2100                | 0                  | 0                   | 0             | 0                     | 2021          | 0                    | 0      | 0              | 0                     | 0                                        | 1                               |
|         | 0              | 2100    | 0              | 0                   | 0                  | 2067                | 2021          | 2021                  | 0             | 2100                 | 2047   | 2082           | 0                     | 0                                        | -5                              |
| NEU     | 0              | 0       | 2100           | 0                   | 0                  | 0                   | 0             | 2099                  | 2047          | 0                    | 2058   | 0              | 0                     | 0                                        | 2                               |
|         | 2033           | 0       | 0              | 0                   | 2030               | 2021                | 0             | 0                     | 0             | 0                    | 0      | 0              | 0                     | 2100                                     | -3                              |
| WCE     | 0              | 0       | 0              | 0                   | 0                  | 0                   | 0             | 0                     | 2026          | 0                    | 2054   | 0              | 0                     | 0                                        | 2                               |
|         | 0              | 0       | 2100           | 0                   | 0                  | 0                   | 2096          | 0                     | 0             | 0                    | 0      | 0              | 0                     | 2100                                     | 0                               |
| EEU     | 0              | 0       | 0              | 0                   | 0                  | 0                   | 0             | 0                     | 2093          | 0                    | 2057   | 2021           | 0                     | 0                                        | 3                               |
|         | 2055           | 0       | 0              | 0                   | 2086               | 2021                | 2100          | 0                     | 0             | 0                    | 0      | 0              | 0                     | 0                                        | -3                              |
| MED     | 0              | 0       | 0              | 0                   | 0                  | 0                   | 0             | 0                     | 0             | 0                    | 0      | 0              | 0                     | 0                                        | 0                               |
|         | 2090           | 2093    | 2043           | 2026                | 2099               | 2030                | 2063          | 2081                  | 2077          | 2069                 | 2021   | 2049           | 2100                  | 2098                                     | -11                             |

Continuation of Table S3

|      |      |      |      |      |      |      |      |      |      |      |      |      |      |      |      |    |    |
|------|------|------|------|------|------|------|------|------|------|------|------|------|------|------|------|----|----|
| SAH  | 2092 | 2021 | 0    | 0    | 0    | 0    | 0    | 0    | 2028 | 2040 | 2067 | 0    | 0    | 2059 | 0    | 6  | 4  |
|      | 0    | 0    | 0    | 2082 | 0    | 0    | 0    | 0    | 0    | 0    | 0    | 0    | 0    | 0    | 2075 | -2 |    |
| WAF  | 2065 | 2099 | 0    | 0    | 0    | 0    | 0    | 2021 | 2021 | 2096 | 2094 | 0    | 0    | 2050 | 0    | 5  | 4  |
|      | 0    | 0    | 0    | 0    | 0    | 2021 | 0    | 0    | 0    | 0    | 0    | 0    | 0    | 0    | 0    | -1 |    |
| CAF  | 0    | 2100 | 0    | 0    | 0    | 0    | 2099 | 0    | 2024 | 2087 | 2043 | 0    | 0    | 2021 | 0    | 4  | 4  |
|      | 0    | 0    | 0    | 0    | 0    | 0    | 0    | 0    | 0    | 0    | 0    | 0    | 0    | 0    | 0    | 0  |    |
| NEAF | 2077 | 0    | 2043 | 2025 | 0    | 0    | 2029 | 0    | 2092 | 2087 | 2057 | 2067 | 2021 | 2048 | 2089 | 10 | 9  |
|      | 0    | 0    | 0    | 0    | 0    | 0    | 0    | 0    | 0    | 0    | 0    | 0    | 0    | 0    | 0    | -1 |    |
| SEAF | 2098 | 2096 | 0    | 2099 | 0    | 0    | 0    | 0    | 0    | 2097 | 0    | 2097 | 0    | 0    | 0    | 0  | -1 |
|      | 0    | 0    | 0    | 0    | 0    | 0    | 0    | 2021 | 0    | 0    | 0    | 0    | 0    | 0    | 0    | -1 |    |
| WSAF | 0    | 0    | 0    | 0    | 0    | 0    | 0    | 0    | 0    | 0    | 0    | 0    | 0    | 0    | 0    | 0  | -1 |
|      | 2098 | 2098 | 2099 | 2100 | 2098 | 2100 | 2098 | 2100 | 2096 | 2083 | 0    | 0    | 2097 | 0    | 0    | -1 |    |
| ESAF | 0    | 0    | 0    | 0    | 0    | 0    | 0    | 0    | 0    | 0    | 0    | 0    | 0    | 0    | 0    | 0  | -1 |
|      | 0    | 2098 | 0    | 0    | 0    | 2022 | 2100 | 2100 | 2100 | 2100 | 0    | 0    | 2099 | 0    | 0    | -1 |    |
| MDG  | 0    | 0    | 2100 | 2099 | 0    | 0    | 0    | 0    | 0    | 0    | 0    | 0    | 2083 | 0    | 0    | 1  | -2 |
|      | 0    | 0    | 0    | 0    | 0    | 2021 | 2088 | 2075 | 0    | 2075 | 0    | 0    | 2100 | 0    | 0    | -3 |    |
| RAR  | 0    | 0    | 2036 | 2048 | 0    | 0    | 0    | 2099 | 2060 | 2021 | 0    | 2095 | 0    | 2100 | 0    | 5  | 0  |
|      | 2095 | 2083 | 0    | 0    | 2039 | 2021 | 0    | 0    | 0    | 0    | 0    | 0    | 0    | 0    | 2021 | -5 |    |
| WSB  | 0    | 2077 | 2097 | 2093 | 0    | 0    | 0    | 2100 | 2096 | 2090 | 0    | 0    | 2038 | 0    | 0    | 4  | 1  |
|      | 2086 | 0    | 0    | 0    | 2021 | 2021 | 0    | 0    | 0    | 0    | 0    | 0    | 0    | 0    | 0    | -3 |    |
| ESB  | 0    | 0    | 0    | 0    | 0    | 0    | 0    | 0    | 2087 | 0    | 0    | 0    | 0    | 2100 | 0    | 1  | -5 |
|      | 2043 | 0    | 0    | 0    | 2023 | 2021 | 0    | 0    | 0    | 2086 | 0    | 0    | 2089 | 0    | 2021 | -6 |    |
| RFE  | 0    | 0    | 2057 | 2064 | 0    | 0    | 0    | 0    | 2097 | 2045 | 0    | 0    | 0    | 0    | 0    | 3  | -1 |
|      | 2030 | 0    | 0    | 0    | 2021 | 2021 | 0    | 0    | 0    | 0    | 0    | 0    | 2100 | 0    | 2021 | -4 |    |
| WCA  | 0    | 0    | 0    | 0    | 0    | 0    | 0    | 0    | 0    | 0    | 0    | 0    | 2100 | 2100 | 0    | 0  | -2 |
|      | 0    | 0    | 0    | 0    | 2099 | 2082 | 0    | 0    | 0    | 2087 | 0    | 0    | 0    | 0    | 0    | -2 |    |
| ECA  | 2022 | 0    | 0    | 0    | 0    | 0    | 0    | 2045 | 0    | 0    | 0    | 2021 | 2021 | 0    | 0    | 4  | 3  |
|      | 0    | 2099 | 2100 | 0    | 2100 | 0    | 0    | 0    | 0    | 2021 | 0    | 0    | 0    | 0    | 0    | -1 |    |
| TIB  | 0    | 0    | 2077 | 2084 | 0    | 0    | 0    | 2088 | 2088 | 2021 | 0    | 0    | 0    | 2099 | 0    | 5  | 1  |
|      | 2039 | 0    | 0    | 0    | 2031 | 2072 | 0    | 0    | 0    | 0    | 0    | 0    | 2099 | 0    | 2021 | -4 |    |
| EAS  | 0    | 0    | 0    | 0    | 0    | 0    | 0    | 0    | 0    | 0    | 0    | 0    | 0    | 0    | 0    | 0  | -3 |
|      | 0    | 0    | 0    | 0    | 2100 | 2021 | 2089 | 2089 | 2092 | 0    | 2100 | 0    | 0    | 0    | 0    | -3 |    |
| ARP  | 2092 | 2095 | 2021 | 2021 | 0    | 0    | 0    | 2072 | 2052 | 0    | 2087 | 2097 | 2098 | 2067 | 0    | 8  | 7  |
|      | 0    | 0    | 0    | 0    | 0    | 0    | 0    | 0    | 0    | 2099 | 0    | 0    | 0    | 0    | 2032 | -1 |    |
| SAS  | 2099 | 0    | 2021 | 2021 | 2100 | 0    | 0    | 2091 | 2098 | 0    | 0    | 2041 | 0    | 2042 | 2098 | 5  | 4  |
|      | 0    | 0    | 0    | 0    | 0    | 2021 | 0    | 0    | 0    | 0    | 0    | 0    | 0    | 0    | 0    | -1 |    |
| SEA  | 0    | 0    | 0    | 0    | 0    | 2099 | 0    | 0    | 0    | 0    | 0    | 2099 | 2060 | 2098 | 0    | 1  | 0  |
|      | 0    | 0    | 0    | 0    | 0    | 0    | 2021 | 2100 | 0    | 0    | 0    | 0    | 0    | 0    | 0    | -1 |    |
| NAU  | 0    | 0    | 0    | 0    | 2100 | 0    | 0    | 0    | 0    | 0    | 0    | 0    | 0    | 0    | 0    | 0  | 0  |
|      | 0    | 0    | 0    | 0    | 0    | 0    | 0    | 0    | 2100 | 0    | 0    | 0    | 0    | 0    | 0    | 0  | 0  |
| CAU  | 0    | 0    | 0    | 0    | 0    | 0    | 0    | 0    | 0    | 0    | 0    | 0    | 0    | 2077 | 0    | 1  | 0  |
|      | 0    | 2097 | 0    | 0    | 0    | 0    | 0    | 2100 | 2100 | 2089 | 0    | 0    | 0    | 0    | 0    | -1 |    |

| Continuation of Table S3 |      |      |      |   |      |      |      |      |      |      |   |      |      |   |
|--------------------------|------|------|------|---|------|------|------|------|------|------|---|------|------|---|
|                          | 0    | 0    | 0    | 0 | 0    | 0    | 0    | 0    | 0    | 0    | 0 | 0    | 0    | 0 |
| EAU                      | 0    | 0    | 0    | 0 | 0    | 0    | 0    | 0    | 0    | 0    | 0 | 0    | 0    | 0 |
|                          | 0    | 0    | 0    | 0 | 0    | 0    | 2100 | 2092 | 2100 | 0    | 0 | 0    | 2098 | 0 |
| SAU                      | 0    | 0    | 0    | 0 | 0    | 0    | 0    | 0    | 0    | 0    | 0 | 0    | 0    | 0 |
|                          | 2098 | 2099 | 2099 | 0 | 2099 | 2021 | 2099 | 2096 | 0    | 0    | 0 | 2089 | 2098 | 0 |
| NZ                       | 0    | 2100 | 0    | 0 | 0    | 0    | 0    | 0    | 2028 | 2095 | 0 | 0    | 0    | 2 |
|                          | 0    | 0    | 0    | 0 | 2100 | 2098 | 2098 | 0    | 0    | 0    | 0 | 0    | 0    | 0 |

End of TableS3

Table S4: As in S2, but for SSP3-7.0 scenario.

| Regions | ACCESS-<br>CM2 | CanESM5 | CESM2 | CESM2-<br>WACCM | CNRM-<br>CM6-<br>I | CNRM-<br>ESM2-<br>I | EC-<br>Earth3 | EC-<br>Earth3-<br>Veg | GFDL-<br>ESM4 | IPSL-<br>CM6A-<br>LR | MIROC6 | MIROC-<br>ES2L | MPI-<br>ESM1-<br>2-HR | UKESM1-<br>0-LL | Number<br>of models<br>with TOE | Net Num-<br>ber<br>of<br>Models |
|---------|----------------|---------|-------|-----------------|--------------------|---------------------|---------------|-----------------------|---------------|----------------------|--------|----------------|-----------------------|-----------------|---------------------------------|---------------------------------|
| NWN     | 0              | 0       | 2047  | 2041            | 0                  | 0                   | 2082          | 0                     | 2021          | 2099                 | 0      | 2076           | 2024                  | 0               | 6                               | 1                               |
|         | 2040           | 2021    | 0     | 0               | 2045               | 2021                | 0             | 0                     | 0             | 0                    | 0      | 0              | 0                     | 2021            | -5                              |                                 |
| NEN     | 0              | 0       | 2021  | 2021            | 0                  | 0                   | 0             | 0                     | 2021          | 0                    | 2099   | 2069           | 0                     | 0               | 4                               | 0                               |
|         | 2023           | 0       | 0     | 0               | 2021               | 2021                | 0             | 2099                  | 0             | 0                    | 0      | 0              | 2099                  | 2021            | -4                              |                                 |
| WNA     | 0              | 0       | 0     | 0               | 0                  | 0                   | 0             | 0                     | 2021          | 0                    | 2099   | 0              | 2092                  | 2100            | 2                               | -1                              |
|         | 0              | 0       | 2099  | 2095            | 2100               | 2058                | 2096          | 2089                  | 0             | 0                    | 0      | 0              | 0                     | 0               | -3                              |                                 |
| CNA     | 0              | 0       | 0     | 0               | 0                  | 0                   | 0             | 0                     | 2093          | 0                    | 0      | 0              | 0                     | 2100            | 1                               | -3                              |
|         | 2098           | 2099    | 0     | 2097            | 0                  | 2021                | 2092          | 2085                  | 0             | 2100                 | 2098   | 2047           | 0                     | 0               | -4                              |                                 |
| ENA     | 0              | 0       | 2100  | 2100            | 0                  | 0                   | 0             | 0                     | 2094          | 0                    | 0      | 0              | 0                     | 0               | 1                               | 0                               |
|         | 2098           | 0       | 0     | 0               | 2098               | 2077                | 2096          | 2099                  | 0             | 0                    | 0      | 0              | 0                     | 0               | -1                              |                                 |
| NCA     | 0              | 0       | 0     | 0               | 0                  | 0                   | 0             | 0                     | 0             | 0                    | 0      | 0              | 0                     | 0               | 0                               | -7                              |
|         | 0              | 2095    | 2099  | 0               | 2093               | 2072                | 2021          | 2052                  | 0             | 0                    | 2022   | 2021           | 2100                  | 0               | -7                              |                                 |
| SCA     | 0              | 0       | 0     | 0               | 0                  | 0                   | 0             | 0                     | 0             | 0                    | 0      | 0              | 0                     | 0               | 1                               | -8                              |
|         | 2084           | 2063    | 2094  | 2100            | 0                  | 0                   | 2093          | 2045                  | 2056          | 2083                 | 2073   | 0              | 0                     | 2082            | -9                              |                                 |
| CAR     | 0              | 0       | 0     | 0               | 0                  | 0                   | 0             | 0                     | 0             | 0                    | 2021   | 2021           | 0                     | 0               | 2                               | -3                              |
|         | 2084           | 2092    | 0     | 0               | 0                  | 0                   | 0             | 0                     | 2056          | 2097                 | 0      | 0              | 2087                  | 2095            | -5                              |                                 |
| NWS     | 0              | 0       | 0     | 0               | 2100               | 0                   | 0             | 0                     | 0             | 0                    | 2066   | 0              | 0                     | 0               | 1                               | -6                              |
|         | 0              | 2063    | 2098  | 2061            | 0                  | 2021                | 2072          | 2049                  | 2084          | 2099                 | 0      | 0              | 0                     | 2091            | -7                              |                                 |
| NSA     | 0              | 0       | 0     | 0               | 0                  | 0                   | 0             | 0                     | 0             | 0                    | 0      | 0              | 0                     | 0               | 0                               | -10                             |
|         | 2077           | 2031    | 0     | 2100            | 2074               | 2092                | 2094          | 2098                  | 2067          | 2078                 | 2050   | 2042           | 2099                  | 2091            | -10                             |                                 |
| NES     | 0              | 0       | 2098  | 2100            | 0                  | 0                   | 0             | 0                     | 0             | 0                    | 0      | 0              | 0                     | 0               | 0                               | -3                              |
|         | 0              | 2071    | 0     | 0               | 2100               | 2021                | 0             | 0                     | 0             | 0                    | 2059   | 0              | 0                     | 0               | -3                              |                                 |
| SAM     | 0              | 0       | 0     | 0               | 0                  | 0                   | 0             | 0                     | 0             | 0                    | 0      | 0              | 0                     | 0               | 0                               | -7                              |
|         | 2097           | 2029    | 0     | 0               | 2100               | 2021                | 2086          | 2088                  | 2078          | 0                    | 2100   | 2028           | 2099                  | 2092            | -7                              |                                 |
| SWS     | 0              | 0       | 0     | 0               | 0                  | 0                   | 0             | 0                     | 0             | 0                    | 0      | 0              | 0                     | 0               | 0                               | -12                             |
|         | 2088           | 2032    | 2028  | 2062            | 2054               | 2021                | 2021          | 2021                  | 2097          | 2070                 | 2029   | 2046           | 2027                  | 0               | -12                             |                                 |
| SES     | 2093           | 0       | 2066  | 2073            | 2095               | 0                   | 0             | 0                     | 2021          | 0                    | 2021   | 2021           | 0                     | 2100            | 7                               | 6                               |
|         | 0              | 2096    | 0     | 0               | 0                  | 2021                | 2097          | 0                     | 0             | 0                    | 0      | 0              | 0                     | 0               | -1                              |                                 |
| SSA     | 0              | 0       | 0     | 0               | 0                  | 0                   | 0             | 0                     | 2021          | 0                    | 0      | 0              | 0                     | 2099            | 1                               | -6                              |
|         | 2097           | 2076    | 0     | 0               | 2099               | 2035                | 2021          | 2021                  | 0             | 2094                 | 2046   | 2061           | 0                     | 0               | -7                              |                                 |
| NEU     | 0              | 0       | 0     | 0               | 0                  | 0                   | 2100          | 2100                  | 2021          | 0                    | 2060   | 0              | 0                     | 0               | 2                               | -2                              |
|         | 2037           | 0       | 0     | 0               | 2042               | 2021                | 0             | 0                     | 0             | 0                    | 0      | 2079           | 0                     | 0               | -4                              |                                 |
| WCE     | 0              | 0       | 0     | 0               | 0                  | 0                   | 0             | 0                     | 2058          | 0                    | 2073   | 2099           | 0                     | 0               | 2                               | 2                               |
|         | 2098           | 0       | 2099  | 2099            | 0                  | 0                   | 2100          | 2100                  | 0             | 2099                 | 0      | 0              | 0                     | 0               | 0                               |                                 |
| EEU     | 0              | 0       | 0     | 0               | 0                  | 0                   | 0             | 0                     | 2058          | 0                    | 2021   | 2055           | 2100                  | 2100            | 3                               | 0                               |
|         | 2040           | 0       | 0     | 0               | 2082               | 2021                | 0             | 0                     | 0             | 0                    | 0      | 0              | 0                     | 0               | -3                              |                                 |
| MED     | 0              | 0       | 0     | 0               | 0                  | 0                   | 0             | 0                     | 0             | 0                    | 0      | 0              | 0                     | 0               | 0                               | -14                             |
|         | 2069           | 2072    | 2044  | 2021            | 2060               | 2021                | 2043          | 2051                  | 2047          | 2043                 | 2023   | 2030           | 2074                  | 2094            | -14                             |                                 |



Continuation of Table S4

|      |      |      |      |      |      |      |      |      |      |      |      |      |      |      |      |    |   |
|------|------|------|------|------|------|------|------|------|------|------|------|------|------|------|------|----|---|
| SAH  | 0    | 2021 | 2021 | 0    | 0    | 2094 | 2021 | 2027 | 0    | 2052 | 2067 | 2084 | 2021 | 0    | 2074 | 9  | 7 |
|      | 0    | 0    | 0    | 0    | 0    | 0    | 0    | 0    | 2046 | 0    | 0    | 0    | 0    | 0    | 2074 | -2 |   |
| WAF  | 2043 | 2092 | 2086 | 0    | 2091 | 0    | 2021 | 2027 | 2091 | 2087 | 0    | 0    | 2021 | 2093 | 10   | 9  |   |
|      | 0    | 0    | 0    | 0    | 0    | 2021 | 0    | 0    | 0    | 0    | 0    | 0    | 0    | 0    | 0    | -1 |   |
| CAF  | 2065 | 0    | 2055 | 0    | 2086 | 0    | 0    | 2021 | 0    | 2026 | 2067 | 2099 | 2021 | 2096 | 7    | 6  |   |
|      | 0    | 0    | 0    | 0    | 0    | 2028 | 0    | 0    | 0    | 0    | 0    | 0    | 0    | 0    | -1   |    |   |
| NEAF | 2050 | 2085 | 2023 | 2027 | 2099 | 0    | 2085 | 2078 | 2034 | 2029 | 2021 | 2039 | 2063 | 2059 | 12   | 11 |   |
|      | 0    | 0    | 0    | 0    | 0    | 2021 | 0    | 0    | 0    | 0    | 0    | 0    | 0    | 0    | -1   |    |   |
| SEAF | 2093 | 2086 | 2078 | 2091 | 2099 | 0    | 0    | 2100 | 2073 | 2051 | 0    | 0    | 2067 | 2094 | 8    | 7  |   |
|      | 0    | 0    | 0    | 0    | 0    | 2022 | 0    | 0    | 0    | 0    | 0    | 0    | 0    | 0    | -1   |    |   |
| WSAF | 0    | 0    | 0    | 0    | 0    | 0    | 0    | 0    | 0    | 0    | 0    | 0    | 0    | 0    | 0    | -4 |   |
|      | 0    | 2099 | 2100 | 2085 | 0    | 2041 | 2098 | 2097 | 0    | 2098 | 2083 | 2074 | 0    | 0    | -4   |    |   |
| ESAF | 2100 | 0    | 0    | 0    | 0    | 0    | 0    | 0    | 0    | 0    | 0    | 0    | 2094 | 0    | 1    | 0  |   |
|      | 0    | 2100 | 0    | 2100 | 0    | 2021 | 2098 | 2099 | 0    | 0    | 2099 | 2097 | 0    | 0    | -1   |    |   |
| MDG  | 0    | 0    | 2100 | 0    | 0    | 0    | 0    | 0    | 0    | 0    | 0    | 2099 | 2090 | 0    | 1    | -2 |   |
|      | 2100 | 0    | 0    | 0    | 0    | 2021 | 2090 | 2065 | 0    | 0    | 0    | 0    | 0    | 0    | -3   |    |   |
| RAR  | 0    | 0    | 2039 | 2042 | 0    | 0    | 2028 | 2034 | 2021 | 0    | 0    | 0    | 0    | 0    | 5    | 0  |   |
|      | 2080 | 2050 | 0    | 0    | 2036 | 2021 | 0    | 0    | 0    | 0    | 0    | 0    | 0    | 2021 | -5   |    |   |
| WSB  | 0    | 2088 | 0    | 0    | 0    | 0    | 2100 | 2088 | 2023 | 2096 | 2035 | 2032 | 2094 | 0    | 6    | 3  |   |
|      | 2049 | 0    | 0    | 0    | 2050 | 2021 | 0    | 0    | 0    | 0    | 0    | 0    | 0    | 0    | -3   |    |   |
| ESB  | 0    | 2091 | 0    | 2074 | 0    | 0    | 2099 | 2089 | 0    | 0    | 2021 | 0    | 0    | 0    | 4    | -1 |   |
|      | 2039 | 0    | 0    | 0    | 2049 | 2021 | 0    | 0    | 2094 | 0    | 0    | 0    | 0    | 2021 | -5   |    |   |
| RFE  | 0    | 0    | 2051 | 2058 | 0    | 0    | 2082 | 2064 | 2028 | 0    | 0    | 0    | 0    | 0    | 5    | 1  |   |
|      | 2031 | 0    | 0    | 0    | 2021 | 2021 | 0    | 0    | 0    | 0    | 0    | 0    | 0    | 2021 | -4   |    |   |
| WCA  | 2096 | 0    | 2097 | 0    | 0    | 0    | 0    | 2099 | 0    | 0    | 2095 | 2085 | 2098 | 2100 | 2    | 1  |   |
|      | 0    | 0    | 0    | 0    | 2099 | 2078 | 0    | 0    | 0    | 0    | 0    | 0    | 0    | 0    | -1   |    |   |
| ECA  | 2022 | 0    | 2074 | 2087 | 0    | 0    | 2033 | 2100 | 0    | 2080 | 2021 | 2045 | 0    | 0    | 7    | 6  |   |
|      | 0    | 2100 | 0    | 0    | 0    | 2100 | 0    | 0    | 2021 | 0    | 0    | 0    | 0    | 0    | -1   |    |   |
| TIB  | 0    | 0    | 2021 | 2021 | 0    | 0    | 0    | 2099 | 2021 | 0    | 0    | 0    | 2081 | 0    | 4    | -1 |   |
|      | 2030 | 0    | 0    | 0    | 2025 | 2080 | 0    | 0    | 0    | 2066 | 0    | 0    | 0    | 2031 | -5   |    |   |
| EAS  | 0    | 0    | 0    | 0    | 0    | 0    | 0    | 0    | 0    | 0    | 0    | 0    | 2100 | 2100 | 0    | -1 |   |
|      | 0    | 2100 | 0    | 0    | 2100 | 2071 | 2097 | 2098 | 0    | 0    | 0    | 0    | 0    | 0    | -1   |    |   |
| ARP  | 0    | 2095 | 2021 | 2021 | 0    | 0    | 2024 | 2021 | 0    | 2077 | 2077 | 0    | 2085 | 2100 | 8    | 8  |   |
|      | 0    | 0    | 0    | 0    | 0    | 0    | 0    | 0    | 2099 | 0    | 0    | 0    | 0    | 0    | 0    |    |   |
| SAS  | 2096 | 2098 | 2021 | 2021 | 2095 | 0    | 0    | 2096 | 0    | 0    | 2065 | 2099 | 2021 | 2089 | 6    | 5  |   |
|      | 0    | 0    | 0    | 0    | 0    | 2021 | 0    | 0    | 0    | 0    | 0    | 0    | 0    | 0    | -1   |    |   |
| SEA  | 0    | 0    | 0    | 0    | 2094 | 0    | 0    | 0    | 0    | 2096 | 0    | 2064 | 2078 | 0    | 3    | 2  |   |
|      | 0    | 2100 | 0    | 0    | 0    | 2021 | 2100 | 2099 | 0    | 0    | 0    | 0    | 0    | 0    | -1   |    |   |
| NAU  | 0    | 0    | 2100 | 0    | 0    | 0    | 0    | 0    | 0    | 0    | 0    | 0    | 2098 | 0    | 0    | 0  |   |
|      | 0    | 0    | 0    | 0    | 0    | 0    | 0    | 0    | 0    | 0    | 2100 | 0    | 0    | 0    | 0    |    |   |
| CAU  | 0    | 0    | 0    | 0    | 0    | 0    | 0    | 0    | 0    | 0    | 0    | 0    | 2063 | 0    | 1    | 0  |   |
|      | 0    | 2100 | 0    | 0    | 0    | 2100 | 0    | 0    | 2080 | 0    | 0    | 0    | 0    | 0    | -1   |    |   |

| Continuation of Table S4 |   |      |      |      |      |      |      |      |      |      |      |      |      |      |      |    |
|--------------------------|---|------|------|------|------|------|------|------|------|------|------|------|------|------|------|----|
|                          | 0 | 0    | 0    | 0    | 0    | 0    | 0    | 0    | 0    | 0    | 0    | 0    | 0    | 0    | 0    |    |
| EAU                      | 0 | 0    | 0    | 0    | 0    | 0    | 0    | 0    | 0    | 0    | 0    | 0    | 0    | 0    | 0    | -1 |
|                          | 0 | 0    | 0    | 0    | 0    | 2100 | 2093 | 0    | 2100 | 0    | 0    | 0    | 0    | 0    | 0    | -1 |
| SAU                      | 0 | 0    | 0    | 0    | 0    | 0    | 0    | 0    | 0    | 0    | 0    | 0    | 0    | 0    | 0    | -4 |
|                          | 0 | 2100 | 2093 | 2093 | 2098 | 2094 | 2021 | 2094 | 0    | 2098 | 0    | 2099 | 0    | 0    | 2100 | -4 |
| NZ                       | 0 | 0    | 0    | 2100 | 2099 | 0    | 0    | 0    | 0    | 2021 | 2094 | 0    | 2100 | 0    | 0    | 2  |
|                          | 0 | 0    | 0    | 0    | 0    | 2099 | 2021 | 0    | 2099 | 0    | 0    | 0    | 0    | 2099 | 0    | -1 |
| End of TableS4           |   |      |      |      |      |      |      |      |      |      |      |      |      |      |      |    |

Table S5: As in S2, but for SSP5-8.5 scenario.

| Regions | ACCESS-<br>CM2 | CanESM5 | CESM2 | CESM2-<br>WACCM | CNRM-<br>CM6-<br>I | CNRM-<br>ESM2-<br>I | EC-<br>Earth3 | EC-<br>Earth3-<br>Veg | GFDL-<br>ESM4 | IPSL-<br>CM6A-<br>LR | MIROC6 | MIROC-<br>ES2L | MPI-<br>ESM1-<br>2-HR | UKESM1 -<br>0-LL | Number<br>of models<br>with TOE | Net Num-<br>ber<br>of<br>Models |
|---------|----------------|---------|-------|-----------------|--------------------|---------------------|---------------|-----------------------|---------------|----------------------|--------|----------------|-----------------------|------------------|---------------------------------|---------------------------------|
| NWN     | 0              | 0       | 2035  | 2021            | 0                  | 0                   | 2091          | 0                     | 2021          | 2099                 | 2089   | 2066           | 2094                  | 0                | 7                               | 2                               |
|         | 2036           | 2021    | 0     | 0               | 2033               | 2021                | 0             | 0                     | 0             | 0                    | 0      | 0              | 0                     | 2021             | -5                              |                                 |
| NEN     | 0              | 0       | 2021  | 2021            | 0                  | 0                   | 0             | 0                     | 0             | 0                    | 2096   | 2067           | 0                     | 0                | 3                               | -2                              |
|         | 2022           | 2057    | 0     | 0               | 2021               | 2023                | 0             | 0                     | 0             | 0                    | 0      | 0              | 0                     | 2021             | -5                              |                                 |
| WNA     | 0              | 0       | 0     | 0               | 0                  | 0                   | 0             | 0                     | 2021          | 0                    | 2098   | 0              | 2095                  | 2096             | 2                               | -1                              |
|         | 0              | 0       | 2098  | 0               | 0                  | 2090                | 2083          | 2064                  | 0             | 0                    | 0      | 0              | 0                     | 0                | -3                              |                                 |
| CNA     | 0              | 0       | 0     | 0               | 2100               | 0                   | 0             | 0                     | 2099          | 0                    | 0      | 0              | 0                     | 2097             | 0                               | -6                              |
|         | 2100           | 2088    | 2098  | 0               | 0                  | 2021                | 2083          | 2056                  | 0             | 0                    | 2076   | 2047           | 0                     | 0                | -6                              |                                 |
| ENA     | 0              | 0       | 2080  | 2096            | 0                  | 0                   | 0             | 0                     | 0             | 0                    | 0      | 0              | 0                     | 2100             | 1                               | -2                              |
|         | 0              | 2094    | 0     | 0               | 2098               | 2098                | 2087          | 2085                  | 0             | 0                    | 2100   | 0              | 0                     | 0                | -3                              |                                 |
| NCA     | 0              | 0       | 0     | 0               | 0                  | 0                   | 0             | 0                     | 0             | 0                    | 0      | 0              | 0                     | 2097             | 0                               | -8                              |
|         | 0              | 0       | 2094  | 2095            | 2086               | 2059                | 2021          | 2050                  | 0             | 0                    | 2053   | 2021           | 2099                  | 0                | -8                              |                                 |
| SCA     | 0              | 0       | 0     | 0               | 2100               | 0                   | 0             | 0                     | 0             | 0                    | 0      | 0              | 0                     | 0                | 0                               | -10                             |
|         | 2080           | 2043    | 2069  | 2059            | 0                  | 2099                | 2084          | 2041                  | 2057          | 2084                 | 2069   | 0              | 0                     | 2068             | -10                             |                                 |
| CAR     | 0              | 0       | 0     | 2096            | 0                  | 0                   | 0             | 0                     | 0             | 0                    | 2021   | 2021           | 0                     | 0                | 2                               | -2                              |
|         | 2083           | 2099    | 0     | 0               | 0                  | 0                   | 0             | 2100                  | 2070          | 0                    | 0      | 0              | 2085                  | 2078             | -4                              |                                 |
| NWS     | 2099           | 0       | 0     | 0               | 2099               | 0                   | 0             | 0                     | 0             | 0                    | 2086   | 0              | 0                     | 0                | 1                               | -6                              |
|         | 0              | 2041    | 2099  | 2094            | 0                  | 2059                | 2059          | 2031                  | 2095          | 0                    | 0      | 2061           | 0                     | 0                | -7                              |                                 |
| NSA     | 0              | 0       | 0     | 0               | 0                  | 0                   | 0             | 0                     | 0             | 0                    | 0      | 0              | 0                     | 0                | 0                               | -12                             |
|         | 2043           | 2044    | 2100  | 2068            | 2075               | 2092                | 2099          | 2090                  | 2058          | 2084                 | 2056   | 2042           | 2095                  | 2055             | -12                             |                                 |
| NES     | 0              | 0       | 2096  | 2100            | 0                  | 0                   | 0             | 0                     | 0             | 0                    | 0      | 0              | 2100                  | 0                | 0                               | -4                              |
|         | 0              | 2087    | 0     | 0               | 0                  | 2021                | 0             | 0                     | 0             | 0                    | 2084   | 2095           | 0                     | 0                | -4                              |                                 |
| SAM     | 0              | 0       | 0     | 0               | 0                  | 0                   | 0             | 0                     | 0             | 2100                 | 0      | 0              | 0                     | 0                | 0                               | -9                              |
|         | 2099           | 2038    | 0     | 2094            | 2093               | 2021                | 2078          | 2040                  | 2067          | 0                    | 2092   | 2048           | 0                     | 2098             | -9                              |                                 |
| SWS     | 0              | 0       | 0     | 0               | 0                  | 0                   | 0             | 0                     | 0             | 0                    | 0      | 0              | 0                     | 0                | 0                               | -12                             |
|         | 2068           | 2035    | 2063  | 2089            | 2054               | 2028                | 2021          | 2021                  | 0             | 2067                 | 2039   | 2024           | 2066                  | 0                | -12                             |                                 |
| SES     | 2087           | 0       | 2058  | 2070            | 2099               | 0                   | 0             | 0                     | 2021          | 2100                 | 2021   | 2021           | 2097                  | 2083             | 7                               | 5                               |
|         | 0              | 2095    | 0     | 0               | 0                  | 2021                | 0             | 2100                  | 0             | 0                    | 0      | 0              | 0                     | 0                | -2                              |                                 |
| SSA     | 0              | 0       | 2100  | 0               | 0                  | 0                   | 0             | 0                     | 2021          | 0                    | 0      | 0              | 0                     | 0                | 1                               | -6                              |
|         | 0              | 2059    | 0     | 0               | 2100               | 2063                | 2021          | 2021                  | 0             | 2095                 | 2049   | 2059           | 0                     | 2099             | -7                              |                                 |
| NEU     | 0              | 0       | 2098  | 2099            | 0                  | 0                   | 2100          | 0                     | 2021          | 2097                 | 2052   | 2082           | 2098                  | 2100             | 3                               | 0                               |
|         | 2030           | 0       | 0     | 0               | 2033               | 2021                | 0             | 0                     | 0             | 0                    | 0      | 0              | 0                     | 0                | -3                              |                                 |
| WCE     | 0              | 0       | 0     | 0               | 0                  | 0                   | 0             | 0                     | 2080          | 0                    | 2079   | 2095           | 0                     | 0                | 3                               | 3                               |
|         | 2098           | 0       | 0     | 0               | 0                  | 0                   | 0             | 2100                  | 0             | 0                    | 0      | 0              | 0                     | 0                | 0                               |                                 |
| EEU     | 0              | 2100    | 0     | 0               | 0                  | 0                   | 2100          | 0                     | 2078          | 0                    | 2055   | 2074           | 2099                  | 2098             | 3                               | 0                               |
|         | 2036           | 0       | 0     | 0               | 2066               | 2021                | 0             | 0                     | 0             | 0                    | 0      | 0              | 0                     | 0                | -3                              |                                 |
| MED     | 0              | 0       | 0     | 0               | 0                  | 0                   | 0             | 0                     | 0             | 0                    | 0      | 0              | 0                     | 0                | 0                               | -13                             |
|         | 2063           | 2062    | 2026  | 2022            | 2068               | 2021                | 2053          | 2085                  | 2042          | 2036                 | 2021   | 2033           | 2092                  | 2098             | -13                             |                                 |

Continuation of Table S5

|      |      |      |      |      |      |      |      |      |      |      |      |      |      |      |      |      |    |    |
|------|------|------|------|------|------|------|------|------|------|------|------|------|------|------|------|------|----|----|
| SAH  | 0    | 2021 | 2021 | 2095 | 2100 | 2100 | 2100 | 2021 | 2021 | 2033 | 0    | 2023 | 2066 | 2067 | 2040 | 0    | 9  | 8  |
|      | 0    | 0    | 0    | 0    | 0    | 0    | 0    | 0    | 0    | 0    | 0    | 0    | 0    | 0    | 0    | 2043 | -1 |    |
| WAF  | 2097 | 2091 | 0    | 0    | 2100 | 0    | 2100 | 2023 | 2088 | 2021 | 2088 | 2099 | 0    | 0    | 2021 | 0    | 5  | 4  |
|      | 0    | 0    | 0    | 0    | 0    | 2021 | 0    | 0    | 0    | 0    | 0    | 0    | 0    | 0    | 0    | 0    | -1 |    |
| CAF  | 2055 | 0    | 2095 | 2079 | 2076 | 0    | 2076 | 2024 | 2100 | 2021 | 2100 | 2030 | 2090 | 0    | 2021 | 2084 | 10 | 9  |
|      | 0    | 0    | 0    | 0    | 0    | 2021 | 0    | 0    | 0    | 0    | 0    | 0    | 0    | 0    | 0    | 0    | -1 |    |
| NEAF | 2041 | 2070 | 2021 | 2021 | 2089 | 0    | 2089 | 2040 | 2038 | 2029 | 2038 | 2022 | 2021 | 2060 | 2041 | 2030 | 13 | 13 |
|      | 0    | 0    | 0    | 0    | 0    | 0    | 0    | 0    | 0    | 0    | 0    | 0    | 0    | 0    | 0    | 0    | 0  |    |
| SEAF | 2075 | 2083 | 2048 | 2062 | 0    | 0    | 2021 | 2060 | 0    | 2054 | 0    | 2069 | 0    | 0    | 2042 | 2084 | 9  | 8  |
|      | 0    | 0    | 0    | 0    | 0    | 0    | 2021 | 0    | 0    | 0    | 0    | 0    | 0    | 0    | 0    | 0    | -1 |    |
| WSAF | 0    | 0    | 0    | 0    | 0    | 0    | 0    | 0    | 0    | 0    | 0    | 0    | 0    | 0    | 0    | 0    | 0  | -8 |
|      | 2098 | 2078 | 2070 | 2056 | 2099 | 2086 | 2086 | 2085 | 2064 | 2064 | 0    | 0    | 2092 | 2091 | 0    | 0    | -8 |    |
| ESAF | 0    | 0    | 0    | 0    | 0    | 0    | 0    | 0    | 0    | 0    | 0    | 0    | 0    | 0    | 2098 | 0    | 0  | -5 |
|      | 0    | 2090 | 0    | 0    | 2099 | 2021 | 2099 | 2095 | 2098 | 2098 | 0    | 0    | 2089 | 2083 | 0    | 0    | -5 |    |
| MDG  | 0    | 0    | 0    | 2100 | 0    | 0    | 0    | 0    | 0    | 0    | 2097 | 0    | 0    | 0    | 2080 | 0    | 1  | -3 |
|      | 0    | 0    | 0    | 0    | 0    | 2021 | 0    | 2094 | 2049 | 2049 | 0    | 0    | 2094 | 0    | 0    | 0    | -4 |    |
| RAR  | 0    | 0    | 2030 | 2040 | 0    | 0    | 2041 | 2033 | 2021 | 2033 | 2021 | 2095 | 0    | 0    | 2098 | 0    | 6  | 1  |
|      | 2072 | 2084 | 0    | 0    | 2025 | 2021 | 0    | 0    | 0    | 0    | 0    | 0    | 0    | 0    | 0    | 2021 | -5 |    |
| WSB  | 0    | 2095 | 0    | 0    | 0    | 0    | 0    | 0    | 2052 | 2095 | 2052 | 2086 | 2073 | 2078 | 2096 | 2093 | 7  | 4  |
|      | 2036 | 0    | 0    | 0    | 2038 | 2046 | 0    | 0    | 0    | 0    | 0    | 0    | 0    | 0    | 0    | 0    | -3 |    |
| ESB  | 0    | 0    | 2075 | 2071 | 0    | 0    | 2099 | 2090 | 0    | 2090 | 0    | 2098 | 2021 | 0    | 2097 | 0    | 4  | -2 |
|      | 2026 | 0    | 0    | 0    | 2030 | 2021 | 0    | 0    | 2081 | 0    | 0    | 0    | 0    | 2037 | 0    | 2021 | -6 |    |
| RFE  | 0    | 0    | 2049 | 2046 | 0    | 0    | 2086 | 2082 | 2042 | 2082 | 2042 | 0    | 0    | 0    | 2096 | 0    | 5  | 1  |
|      | 2026 | 0    | 0    | 0    | 2021 | 2021 | 0    | 0    | 0    | 0    | 0    | 0    | 0    | 2096 | 0    | 2021 | -4 |    |
| WCA  | 2094 | 0    | 0    | 0    | 0    | 0    | 0    | 2099 | 0    | 2099 | 0    | 0    | 0    | 0    | 2088 | 2095 | 3  | 0  |
|      | 0    | 0    | 0    | 0    | 2079 | 2083 | 0    | 0    | 2090 | 0    | 2090 | 0    | 0    | 0    | 0    | 0    | -3 |    |
| ECA  | 2027 | 0    | 2077 | 2091 | 0    | 0    | 2021 | 2098 | 0    | 2098 | 0    | 2080 | 2021 | 2027 | 0    | 2094 | 8  | 5  |
|      | 0    | 0    | 0    | 0    | 2093 | 2091 | 0    | 0    | 2021 | 0    | 2021 | 0    | 0    | 0    | 0    | 0    | -3 |    |
| TIB  | 0    | 0    | 2021 | 2021 | 0    | 0    | 0    | 0    | 2021 | 0    | 2021 | 0    | 0    | 0    | 2072 | 0    | 4  | -1 |
|      | 2033 | 2100 | 0    | 0    | 2021 | 2078 | 2097 | 0    | 0    | 2059 | 2098 | 2100 | 2098 | 2100 | 0    | 2021 | -5 |    |
| EAS  | 0    | 0    | 2095 | 0    | 0    | 0    | 0    | 0    | 0    | 0    | 0    | 0    | 0    | 0    | 2082 | 0    | 2  | -2 |
|      | 0    | 2100 | 0    | 0    | 2095 | 2029 | 2094 | 2093 | 0    | 2093 | 0    | 0    | 0    | 2097 | 0    | 0    | -4 |    |
| ARP  | 2069 | 2029 | 2021 | 2021 | 0    | 0    | 2046 | 2048 | 0    | 2048 | 0    | 2054 | 2062 | 2074 | 2042 | 0    | 10 | 10 |
|      | 0    | 0    | 0    | 0    | 0    | 0    | 0    | 0    | 2100 | 0    | 2100 | 0    | 0    | 0    | 0    | 0    | 0  |    |
| SAS  | 2098 | 2096 | 2021 | 2021 | 2087 | 0    | 2095 | 2091 | 2087 | 2091 | 2087 | 0    | 2033 | 0    | 2031 | 2098 | 8  | 7  |
|      | 0    | 0    | 0    | 0    | 0    | 0    | 0    | 0    | 0    | 0    | 0    | 0    | 0    | 0    | 0    | 0    | -1 |    |
| SEA  | 0    | 0    | 0    | 0    | 2095 | 0    | 0    | 0    | 0    | 0    | 0    | 2100 | 2100 | 2067 | 2083 | 0    | 3  | 2  |
|      | 0    | 2094 | 0    | 0    | 0    | 0    | 0    | 0    | 0    | 0    | 0    | 0    | 0    | 0    | 0    | 2100 | -1 |    |
| NAU  | 0    | 0    | 0    | 0    | 2099 | 0    | 0    | 0    | 2097 | 0    | 2097 | 0    | 0    | 0    | 2097 | 2100 | 0  | -1 |
|      | 0    | 2100 | 0    | 0    | 0    | 0    | 0    | 0    | 0    | 0    | 0    | 0    | 0    | 2095 | 0    | 0    | -1 |    |
| CAU  | 0    | 0    | 0    | 0    | 0    | 0    | 0    | 0    | 0    | 0    | 0    | 0    | 2100 | 0    | 2072 | 0    | 1  | 1  |
|      | 0    | 2099 | 0    | 0    | 0    | 0    | 0    | 0    | 0    | 0    | 0    | 2098 | 0    | 2100 | 0    | 0    | 0  |    |

| Continuation of Table S5 |   |      |      |      |      |      |      |      |      |   |      |   |      |
|--------------------------|---|------|------|------|------|------|------|------|------|---|------|---|------|
|                          | 0 | 0    | 0    | 0    | 0    | 0    | 0    | 0    | 0    | 0 | 0    | 0 | 0    |
| EAU                      | 0 | 0    | 0    | 0    | 0    | 0    | 0    | 0    | 0    | 0 | 0    | 0 | 0    |
|                          | 0 | 0    | 0    | 0    | 0    | 0    | 0    | 0    | 0    | 0 | 0    | 0 | 0    |
| SAU                      | 0 | 0    | 0    | 0    | 0    | 0    | 0    | 0    | 0    | 0 | 0    | 0 | 0    |
|                          | 0 | 2100 | 2078 | 2089 | 0    | 2021 | 0    | 0    | 0    | 0 | 2095 | 0 | 2099 |
| NZ                       | 0 | 0    | 0    | 2099 | 2100 | 0    | 0    | 0    | 2097 | 0 | 2100 | 0 | 2099 |
|                          | 0 | 0    | 0    | 0    | 0    | 0    | 2099 | 2098 | 0    | 0 | 0    | 0 | 0    |
| End of Table S5          |   |      |      |      |      |      |      |      |      |   |      |   |      |

**Table S6.** Number of months with permanent dry departure in SSP1-2.6 for each climate reference region in every ESM. The land area covered in ice, i.e. Antarctica and Greenland are excluded from the analysis. Negative signs are assigned to the ensemble means to denote dry departure.

| Regions | ACCESS-CM2 | CanESM5 | CESM2 | CESM2-WACCM | CNRM-CM6-1 | CNRM-ESM2-1 | EC-Earth3 | EC-Earth3-Veg | GFDL-ESM4 | IPSL-CM6A-LR | MIROC6 | MIROC-ES2L | MPI-ESM1-2-HR | UKESM1-0-LL | Ensemble Mean |
|---------|------------|---------|-------|-------------|------------|-------------|-----------|---------------|-----------|--------------|--------|------------|---------------|-------------|---------------|
| GIC     | 0          | 12      | 0     | 0           | 0          | 0           | 12        | 12            | 0         | 12           | 0      | 0          | 0             | 12          |               |
| NWN     | 12         | 9       | 0     | 0           | 12         | 12          | 0         | 0             | 0         | 0            | 0      | 0          | 0             | 12          | -4.071428571  |
| NEN     | 12         | 3       | 0     | 0           | 12         | 12          | 0         | 0             | 0         | 0            | 0      | 0          | 0             | 12          | -3.642857143  |
| WNA     | 0          | 0       | 1     | 4           | 0          | 2           | 0         | 7             | 0         | 0            | 0      | 0          | 0             | 0           | -1            |
| CNA     | 1          | 0       | 0     | 0           | 0          | 10          | 0         | 0             | 0         | 0            | 1      | 12         | 0             | 0           | -1.714285714  |
| ENA     | 0          | 0       | 0     | 0           | 2          | 0           | 0         | 0             | 0         | 0            | 0      | 0          | 0             | 0           | -0.142857143  |
| NCA     | 0          | 0       | 0     | 0           | 0          | 2           | 12        | 3             | 0         | 0            | 12     | 12         | 0             | 0           | -2.928571429  |
| SCA     | 0          | 0       | 0     | 0           | 0          | 0           | 0         | 1             | 0         | 0            | 0      | 0          | 0             | 0           | -0.071428571  |
| CAR     | 0          | 0       | 0     | 0           | 0          | 0           | 0         | 0             | 0         | 0            | 0      | 0          | 7             | 0           | -0.5          |
| NWS     | 0          | 1       | 0     | 0           | 0          | 1           | 0         | 5             | 0         | 0            | 0      | 1          | 0             | 0           | -0.571428571  |
| NSA     | 0          | 4       | 0     | 0           | 0          | 0           | 0         | 0             | 0         | 4            | 0      | 0          | 0             | 0           | -0.571428571  |
| NES     | 1          | 0       | 0     | 0           | 0          | 9           | 0         | 0             | 0         | 0            | 0      | 0          | 0             | 0           | -0.714285714  |
| SAM     | 0          | 5       | 0     | 0           | 0          | 12          | 0         | 2             | 0         | 0            | 6      | 0          | 0             | 0           | -1.785714286  |
| SWS     | 4          | 4       | 5     | 0           | 3          | 9           | 12        | 12            | 0         | 0            | 2      | 0          | 0             | 0           | -3.642857143  |
| SES     | 0          | 0       | 0     | 0           | 0          | 12          | 0         | 0             | 0         | 0            | 0      | 0          | 0             | 0           | -0.857142857  |
| SSA     | 0          | 4       | 0     | 0           | 0          | 1           | 5         | 12            | 0         | 0            | 1      | 0          | 0             | 0           | -1.642857143  |
| NEU     | 12         | 0       | 0     | 0           | 12         | 12          | 0         | 0             | 0         | 0            | 0      | 0          | 0             | 0           | -2.571428571  |
| WCE     | 0          | 0       | 0     | 0           | 0          | 0           | 0         | 0             | 0         | 0            | 0      | 0          | 0             | 0           | 0             |
| EEU     | 11         | 0       | 2     | 0           | 4          | 12          | 0         | 0             | 0         | 0            | 0      | 0          | 0             | 0           | -2.071428571  |
| MED     | 4          | 0       | 12    | 12          | 0          | 9           | 10        | 4             | 5         | 1            | 12     | 12         | 0             | 0           | -5.785714286  |
| SAH     | 0          | 0       | 0     | 3           | 0          | 0           | 0         | 0             | 12        | 0            | 7      | 11         | 0             | 12          | -3.214285714  |
| WAF     | 0          | 0       | 0     | 0           | 0          | 11          | 0         | 0             | 0         | 0            | 0      | 0          | 0             | 0           | -0.785714286  |
| CAF     | 0          | 0       | 0     | 0           | 0          | 1           | 0         | 0             | 0         | 0            | 0      | 0          | 0             | 0           | -0.071428571  |
| NEAF    | 0          | 0       | 0     | 0           | 0          | 4           | 0         | 0             | 0         | 0            | 0      | 0          | 0             | 0           | -0.285714286  |
| SEAF    | 0          | 0       | 0     | 0           | 0          | 4           | 0         | 0             | 0         | 0            | 0      | 0          | 0             | 0           | -0.285714286  |
| WSAF    | 2          | 1       | 0     | 3           | 0          | 0           | 2         | 2             | 0         | 0            | 6      | 0          | 0             | 0           | -1.142857143  |
| ESAF    | 0          | 0       | 0     | 0           | 0          | 0           | 5         | 0             | 0         | 0            | 8      | 0          | 0             | 0           | -0.928571429  |
| MDG     | 0          | 0       | 0     | 0           | 0          | 6           | 0         | 2             | 0         | 0            | 0      | 0          | 0             | 0           | -0.571428571  |
| RAR     | 0          | 3       | 0     | 0           | 12         | 12          | 0         | 0             | 0         | 0            | 0      | 0          | 0             | 12          | -2.785714286  |
| WSB     | 7          | 0       | 2     | 0           | 12         | 12          | 0         | 0             | 0         | 0            | 0      | 0          | 0             | 0           | -2.357142857  |
| ESB     | 12         | 0       | 0     | 0           | 12         | 12          | 0         | 0             | 0         | 0            | 0      | 12         | 0             | 12          | -4.285714286  |
| RFE     | 12         | 0       | 0     | 0           | 12         | 12          | 0         | 0             | 0         | 0            | 0      | 0          | 0             | 12          | -3.428571429  |
| WCA     | 0          | 0       | 0     | 0           | 1          | 3           | 0         | 0             | 10        | 0            | 0      | 0          | 0             | 0           | -1            |
| ECA     | 0          | 5       | 0     | 0           | 0          | 0           | 0         | 0             | 12        | 0            | 0      | 0          | 0             | 0           | -1.214285714  |
| TIB     | 12         | 0       | 0     | 0           | 12         | 12          | 0         | 0             | 0         | 0            | 0      | 0          | 0             | 12          | -2.571428571  |
| EAS     | 0          | 0       | 0     | 0           | 0          | 0           | 5         | 5             | 0         | 0            | 0      | 0          | 0             | 0           | -0.714285714  |
| ARP     | 0          | 0       | 0     | 0           | 0          | 0           | 0         | 0             | 12        | 0            | 0      | 0          | 0             | 0           | -0.857142857  |
| SAS     | 0          | 0       | 0     | 0           | 0          | 12          | 0         | 0             | 0         | 0            | 0      | 0          | 0             | 0           | -0.857142857  |
| SEA     | 0          | 0       | 0     | 0           | 0          | 2           | 0         | 0             | 0         | 0            | 0      | 0          | 0             | 0           | -0.142857143  |
| NAU     | 0          | 0       | 0     | 0           | 0          | 0           | 0         | 0             | 0         | 0            | 0      | 0          | 0             | 0           | 0             |
| CAU     | 0          | 0       | 0     | 0           | 0          | 0           | 5         | 0             | 12        | 0            | 0      | 0          | 0             | 0           | -1.214285714  |
| EAU     | 0          | 0       | 0     | 0           | 0          | 3           | 4         | 0             | 0         | 0            | 0      | 0          | 0             | 0           | -0.5          |
| SAU     | 0          | 0       | 9     | 0           | 0          | 12          | 3         | 0             | 0         | 0            | 0      | 0          | 1             | 0           | -1.785714286  |
| NZ      | 0          | 0       | 0     | 0           | 0          | 0           | 0         | 0             | 0         | 0            | 0      | 0          | 0             | 0           | 0             |
| EAN     | 0          | 12      | 0     | 0           | 0          | 0           | 0         | 0             | 0         | 0            | 0      | 0          | 0             | 0           | 0             |
| WAN     | 0          | 12      | 0     | 0           | 0          | 0           | 10        | 2             | 0         | 0            | 0      | 0          | 0             | 0           | 0             |

**Table S7.** As in S6, but for the SSP2-4.5 scenario.

| Regions | ACCESS-CM2 | CanESM5 | CESM2 | CESM2-WACCM | CNRM-CM6-1 | CNRM-ESM2-1 | EC-Earth3 | EC-Earth3-Veg | GFDL-ESM4 | IPSL-CM6A-LR | MIROC6 | MIROC-ES2L | MPI-ESM1-2-HR | UKESM1-0-LL | Ensemble Mean |
|---------|------------|---------|-------|-------------|------------|-------------|-----------|---------------|-----------|--------------|--------|------------|---------------|-------------|---------------|
| GIC     | 0          | 12      | 0     | 0           | 0          | 0           | 12        | 12            | 0         | 12           | 0      | 0          | 0             | 11          |               |
| NWN     | 12         | 6       | 0     | 0           | 12         | 12          | 0         | 0             | 0         | 0            | 0      | 0          | 0             | 12          | -3.857142857  |
| NEN     | 12         | 3       | 0     | 0           | 12         | 12          | 0         | 0             | 0         | 0            | 0      | 0          | 0             | 12          | -3.642857143  |
| WNA     | 0          | 0       | 3     | 0           | 0          | 1           | 3         | 7             | 0         | 0            | 0      | 0          | 0             | 0           | -1            |
| CNA     | 0          | 2       | 0     | 0           | 4          | 4           | 10        | 7             | 0         | 0            | 0      | 12         | 0             | 0           | -2.5          |
| ENA     | 0          | 0       | 0     | 0           | 5          | 0           | 0         | 0             | 0         | 0            | 0      | 0          | 0             | 0           | -0.357142857  |
| NCA     | 0          | 0       | 4     | 6           | 3          | 3           | 10        | 12            | 0         | 0            | 12     | 12         | 0             | 0           | -4.214285714  |
| SCA     | 0          | 7       | 0     | 0           | 0          | 0           | 10        | 8             | 0         | 2            | 6      | 0          | 0             | 1           | -2.428571429  |
| CAR     | 0          | 0       | 0     | 0           | 0          | 0           | 0         | 0             | 2         | 2            | 0      | 0          | 5             | 0           | -0.5          |
| NWS     | 0          | 7       | 0     | 2           | 0          | 1           | 2         | 2             | 0         | 0            | 0      | 1          | 0             | 0           | -1.071428571  |
| NSA     | 0          | 7       | 0     | 0           | 0          | 0           | 0         | 0             | 0         | 0            | 2      | 12         | 0             | 0           | -1.5          |
| NES     | 0          | 0       | 0     | 0           | 0          | 8           | 0         | 0             | 0         | 0            | 0      | 0          | 0             | 0           | -0.571428571  |
| SAM     | 0          | 5       | 0     | 0           | 1          | 12          | 0         | 3             | 0         | 0            | 0      | 0          | 0             | 0           | -2.214285714  |
| SWS     | 4          | 8       | 2     | 6           | 6          | 12          | 12        | 12            | 2         | 0            | 12     | 12         | 12            | 0           | -7.142857143  |
| SES     | 0          | 2       | 0     | 0           | 0          | 12          | 0         | 0             | 0         | 0            | 0      | 0          | 0             | 0           | -1            |
| SSA     | 0          | 3       | 0     | 0           | 0          | 5           | 10        | 11            | 0         | 0            | 12     | 12         | 0             | 0           | -3.785714286  |
| NEU     | 12         | 0       | 0     | 0           | 12         | 12          | 0         | 0             | 0         | 0            | 0      | 0          | 0             | 0           | -2.571428571  |
| WCE     | 0          | 0       | 0     | 0           | 0          | 0           | 0         | 0             | 0         | 0            | 0      | 0          | 0             | 0           | 0             |
| EEU     | 5          | 0       | 0     | 0           | 6          | 12          | 0         | 0             | 0         | 0            | 0      | 0          | 0             | 0           | 0             |
| MED     | 3          | 2       | 12    | 12          | 0          | 11          | 12        | 10            | 12        | 5            | 12     | 12         | 0             | 0           | -1.642857143  |
| SAH     | 0          | 0       | 0     | 12          | 0          | 0           | 0         | 0             | 0         | 0            | 0      | 0          | 0             | 10          | -1.571428571  |
| WAF     | 0          | 0       | 0     | 0           | 0          | 12          | 0         | 0             | 0         | 0            | 0      | 0          | 0             | 0           | -0.857142857  |
| CAF     | 0          | 0       | 0     | 0           | 0          | 1           | 0         | 0             | 0         | 0            | 0      | 0          | 0             | 0           | -0.071428571  |
| NEAF    | 0          | 0       | 0     | 0           | 0          | 4           | 0         | 0             | 0         | 0            | 0      | 0          | 0             | 0           | -0.285714286  |
| SEAF    | 0          | 0       | 0     | 0           | 0          | 5           | 0         | 0             | 0         | 0            | 0      | 0          | 0             | 0           | -0.357142857  |
| WSAF    | 0          | 3       | 0     | 1           | 3          | 4           | 0         | 9             | 0         | 0            | 0      | 0          | 0             | 0           | -1.428571429  |
| ESAF    | 0          | 2       | 0     | 0           | 0          | 6           | 0         | 0             | 0         | 0            | 0      | 2          | 0             | 0           | -0.714285714  |
| MDG     | 0          | 2       | 0     | 0           | 0          | 7           | 5         | 9             | 0         | 0            | 0      | 0          | 0             | 0           | -1.642857143  |
| RAR     | 4          | 3       | 0     | 0           | 12         | 12          | 0         | 0             | 0         | 0            | 0      | 0          | 0             | 12          | -3.071428571  |
| WSB     | 11         | 0       | 0     | 0           | 12         | 12          | 0         | 0             | 0         | 0            | 0      | 0          | 0             | 0           | -2.5          |
| ESB     | 12         | 0       | 0     | 0           | 12         | 12          | 0         | 0             | 3         | 0            | 0      | 12         | 0             | 12          | -4.5          |
| RFE     | 12         | 0       | 0     | 0           | 12         | 12          | 0         | 0             | 0         | 0            | 0      | 0          | 0             | 12          | -3.428571429  |
| WCA     | 0          | 0       | 0     | 0           | 0          | 6           | 0         | 0             | 12        | 1            | 0      | 0          | 0             | 0           | -1.357142857  |
| ECA     | 0          | 0       | 0     | 0           | 0          | 0           | 0         | 0             | 12        | 0            | 0      | 0          | 0             | 0           | -0.857142857  |
| TIB     | 12         | 3       | 0     | 0           | 12         | 11          | 0         | 0             | 0         | 0            | 0      | 0          | 0             | 12          | -3.571428571  |
| EAS     | 0          | 0       | 0     | 0           | 0          | 12          | 7         | 6             | 0         | 0            | 0      | 0          | 0             | 0           | -1.785714286  |
| ARP     | 0          | 0       | 0     | 0           | 0          | 0           | 0         | 0             | 0         | 0            | 0      | 0          | 0             | 6           | -0.428571429  |
| SAS     | 0          | 0       | 0     | 0           | 0          | 12          | 0         | 0             | 0         | 0            | 0      | 0          | 0             | 0           | -0.857142857  |
| SEA     | 0          | 0       | 0     | 0           | 0          | 9           | 0         | 0             | 0         | 0            | 0      | 0          | 0             | 0           | -0.642857143  |
| NAU     | 0          | 0       | 0     | 0           | 0          | 0           | 0         | 0             | 0         | 0            | 0      | 0          | 0             | 0           | 0             |
| CAU     | 0          | 3       | 0     | 0           | 0          | 0           | 2         | 2             | 12        | 0            | 0      | 0          | 0             | 0           | -1.214285714  |
| EAU     | 0          | 0       | 0     | 0           | 0          | 2           | 0         | 0             | 0         | 0            | 0      | 0          | 0             | 0           | -0.142857143  |
| SAU     | 0          | 0       | 0     | 0           | 0          | 12          | 0         | 2             | 0         | 0            | 0      | 12         | 0             | 0           | -1.857142857  |
| NZ      | 0          | 0       | 0     | 0           | 0          | 0           | 0         | 0             | 0         | 0            | 0      | 0          | 0             | 0           | 0             |
| EAN     | 0          | 12      | 0     | 0           | 0          | 0           | 9         | 2             | 0         | 0            | 0      | 0          | 0             | 0           | 0             |
| WAN     | 0          | 12      | 0     | 0           | 0          | 0           | 12        | 12            | 0         | 0            | 0      | 0          | 0             | 0           | 0             |

**Table S8.** As in S6, but for the SSP3-7.0 scenario.

| Regions | ACCESS-CM2 | CanESM5 | CESM2 | CESM2-WACCM | CNRM-CM6-1 | CNRM-ESM2-1 | EC-Earth3 | EC-Earth3-Veg | GFDL-ESM4 | IPSL-CM6A-LR | MIROC6 | MIROC-ES2L | MPI-ESM1-2-HR | UKESM1-0-LL | Ensemble Mean |
|---------|------------|---------|-------|-------------|------------|-------------|-----------|---------------|-----------|--------------|--------|------------|---------------|-------------|---------------|
| GIC     | 0          | 12      | 0     | 0           | 0          | 0           | 12        | 12            | 0         | 12           | 0      | 0          | 0             | 12          |               |
| NWN     | 12         | 4       | 0     | 0           | 12         | 12          | 0         | 0             | 0         | 0            | 0      | 0          | 0             | 12          | -3.714285714  |
| NEN     | 12         | 5       | 0     | 0           | 12         | 12          | 0         | 3             | 0         | 4            | 0      | 0          | 0             | 12          | -4.285714286  |
| WNA     | 0          | 2       | 1     | 5           | 0          | 6           | 6         | 8             | 0         | 0            | 0      | 0          | 0             | 0           | -2            |
| CNA     | 0          | 0       | 0     | 0           | 12         | 12          | 3         | 10            | 0         | 0            | 0      | 12         | 0             | 0           | -2.642857143  |
| ENA     | 0          | 0       | 0     | 0           | 2          | 3           | 1         | 0             | 0         | 0            | 0      | 0          | 0             | 0           | -0.428571429  |
| NCA     | 0          | 1       | 0     | 0           | 1          | 4           | 11        | 12            | 0         | 0            | 12     | 12         | 1             | 0           | -3.857142857  |
| SCA     | 2          | 3       | 5     | 0           | 0          | 0           | 12        | 9             | 12        | 4            | 12     | 0          | 0             | 9           | -4.857142857  |
| CAR     | 4          | 5       | 0     | 0           | 0          | 2           | 0         | 12            | 4         | 0            | 0      | 2          | 7             | 0           | -2.571428571  |
| NWS     | 1          | 8       | 1     | 4           | 0          | 12          | 6         | 6             | 11        | 0            | 0      | 0          | 0             | 7           | -4            |
| NSA     | 12         | 4       | 7     | 1           | 8          | 6           | 7         | 12            | 12        | 7            | 12     | 12         | 2             | 7           | -6.928571429  |
| NES     | 0          | 3       | 0     | 0           | 0          | 10          | 0         | 0             | 0         | 0            | 12     | 0          | 0             | 0           | -1.785714286  |
| SAM     | 0          | 11      | 1     | 0           | 0          | 12          | 7         | 6             | 12        | 2            | 0      | 12         | 0             | 4           | -4.785714286  |
| SWS     | 11         | 12      | 7     | 9           | 10         | 12          | 12        | 12            | 0         | 4            | 12     | 12         | 7             | 0           | -8.571428571  |
| SES     | 0          | 0       | 0     | 0           | 0          | 12          | 0         | 0             | 0         | 0            | 0      | 0          | 0             | 0           | -0.857142857  |
| SSA     | 1          | 12      | 0     | 0           | 7          | 12          | 12        | 12            | 0         | 4            | 8      | 12         | 0             | 0           | -4.857142857  |
| NEU     | 12         | 2       | 0     | 0           | 12         | 12          | 0         | 0             | 0         | 0            | 0      | 12         | 0             | 0           | -3.571428571  |
| WCE     | 1          | 0       | 1     | 2           | 0          | 0           | 0         | 0             | 0         | 0            | 0      | 0          | 0             | 0           | -0.285714286  |
| EEU     | 7          | 0       | 0     | 0           | 12         | 12          | 4         | 0             | 0         | 0            | 0      | 0          | 0             | 0           | -2.5          |
| MED     | 12         | 9       | 12    | 12          | 6          | 12          | 12        | 12            | 12        | 11           | 12     | 12         | 9             | 2           | -10.35714286  |
| SAH     | 0          | 0       | 0     | 0           | 0          | 0           | 0         | 0             | 11        | 0            | 0      | 0          | 0             | 11          | -1.571428571  |
| WAF     | 0          | 0       | 0     | 0           | 0          | 12          | 0         | 0             | 0         | 0            | 0      | 0          | 0             | 0           | -0.857142857  |
| CAF     | 0          | 0       | 0     | 0           | 0          | 12          | 0         | 0             | 0         | 0            | 0      | 0          | 0             | 0           | -0.857142857  |
| NEAF    | 0          | 0       | 0     | 0           | 0          | 10          | 0         | 0             | 0         | 0            | 0      | 0          | 0             | 0           | -0.714285714  |
| SEAF    | 0          | 0       | 0     | 0           | 0          | 12          | 0         | 0             | 0         | 0            | 0      | 0          | 0             | 0           | -0.857142857  |
| WSAF    | 1          | 6       | 0     | 12          | 0          | 9           | 2         | 5             | 0         | 1            | 9      | 12         | 0             | 0           | -4.071428571  |
| ESAF    | 0          | 3       | 0     | 0           | 0          | 12          | 0         | 0             | 0         | 0            | 0      | 0          | 0             | 0           | -1.071428571  |
| MDG     | 0          | 0       | 0     | 0           | 0          | 12          | 7         | 6             | 0         | 0            | 0      | 0          | 0             | 0           | -1.785714286  |
| RAR     | 12         | 4       | 0     | 0           | 12         | 12          | 0         | 0             | 0         | 0            | 0      | 0          | 0             | 12          | -3.714285714  |
| WSB     | 10         | 0       | 0     | 0           | 12         | 12          | 0         | 0             | 0         | 0            | 0      | 0          | 0             | 0           | -2.428571429  |
| ESB     | 12         | 0       | 0     | 0           | 12         | 12          | 0         | 0             | 5         | 0            | 0      | 0          | 0             | 12          | -3.785714286  |
| RFE     | 12         | 0       | 0     | 0           | 12         | 12          | 0         | 0             | 0         | 0            | 0      | 0          | 0             | 12          | -3.428571429  |
| WCA     | 0          | 0       | 0     | 0           | 4          | 6           | 0         | 0             | 0         | 4            | 0      | 0          | 0             | 0           | -1            |
| ECA     | 0          | 0       | 0     | 0           | 0          | 0           | 0         | 0             | 12        | 0            | 0      | 0          | 0             | 0           | -0.857142857  |
| TIB     | 12         | 1       | 0     | 0           | 12         | 12          | 0         | 0             | 0         | 9            | 0      | 0          | 0             | 12          | -4.142857143  |
| EAS     | 0          | 0       | 0     | 0           | 0          | 0           | 0         | 1             | 0         | 0            | 0      | 0          | 0             | 0           | -0.071428571  |
| ARP     | 0          | 0       | 0     | 0           | 0          | 0           | 0         | 0             | 0         | 0            | 0      | 0          | 0             | 0           | 0             |
| SAS     | 0          | 0       | 0     | 0           | 0          | 12          | 0         | 0             | 0         | 0            | 0      | 0          | 0             | 0           | -0.857142857  |
| SEA     | 0          | 0       | 0     | 0           | 0          | 5           | 0         | 0             | 0         | 0            | 0      | 0          | 0             | 0           | -0.357142857  |
| NAU     | 0          | 0       | 0     | 0           | 0          | 0           | 0         | 0             | 0         | 0            | 0      | 0          | 0             | 0           | 0             |
| CAU     | 0          | 3       | 0     | 0           | 0          | 0           | 1         | 0             | 12        | 0            | 0      | 0          | 0             | 0           | -1.142857143  |
| EAU     | 0          | 0       | 0     | 0           | 0          | 6           | 0         | 0             | 0         | 0            | 0      | 0          | 0             | 0           | -0.428571429  |
| SAU     | 0          | 4       | 6     | 12          | 0          | 12          | 6         | 0             | 0         | 0            | 0      | 1          | 0             | 0           | -2.928571429  |
| NZ      | 0          | 0       | 0     | 0           | 0          | 12          | 0         | 0             | 0         | 0            | 0      | 0          | 0             | 0           | -0.857142857  |
| EAN     | 0          | 12      | 0     | 0           | 0          | 0           | 0         | 10            | 0         | 0            | 0      | 0          | 0             | 0           | 0             |
| WAN     | 0          | 12      | 0     | 0           | 0          | 0           | 11        | 11            | 0         | 0            | 0      | 0          | 0             | 0           | 0             |



**Table S9.** As in S6, but for the SSP5-8.5 scenario.

| Regions | ACCESS-CM2 | CanESM5 | CESM2 | CESM2-WACCM | CNRM-CM6-1 | CNRM-ESM2-1 | EC-Earth3 | EC-Earth3-Veg | GFDL-ESM4 | IPSL-CM6A-LR | MIROC6 | MIROC-ES2L | MPI-ESM1-2-HR | UKESM1-0-LL | Ensemble Mean |
|---------|------------|---------|-------|-------------|------------|-------------|-----------|---------------|-----------|--------------|--------|------------|---------------|-------------|---------------|
| GIC     | 0          | 12      | 0     | 0           | 0          | 5           | 12        | 12            | 0         | 12           | 0      | 0          | 0             | 12          |               |
| NWN     | 12         | 5       | 0     | 0           | 12         | 12          | 0         | 0             | 0         | 0            | 0      | 0          | 0             | 12          | -3.785714286  |
| NEN     | 12         | 6       | 0     | 0           | 12         | 12          | 3         | 3             | 0         | 1            | 0      | 0          | 1             | 12          | -4.428571429  |
| WNA     | 0          | 3       | 2     | 4           | 0          | 4           | 9         | 9             | 0         | 0            | 0      | 0          | 0             | 0           | -2.214285714  |
| CNA     | 1          | 4       | 0     | 0           | 6          | 6           | 9         | 12            | 0         | 0            | 7      | 12         | 0             | 0           | -3.642857143  |
| ENA     | 0          | 3       | 0     | 0           | 0          | 0           | 2         | 5             | 0         | 0            | 0      | 0          | 0             | 0           | -0.714285714  |
| NCA     | 0          | 3       | 7     | 6           | 3          | 8           | 11        | 7             | 0         | 0            | 12     | 12         | 1             | 0           | -5            |
| SCA     | 1          | 10      | 12    | 2           | 0          | 1           | 10        | 12            | 12        | 4            | 12     | 0          | 0             | 5           | -5.785714286  |
| CAR     | 4          | 2       | 0     | 0           | 0          | 0           | 1         | 8             | 2         | 0            | 0      | 7          | 9             | 0           | -2.357142857  |
| NWS     | 0          | 5       | 0     | 10          | 0          | 5           | 6         | 8             | 2         | 0            | 0      | 12         | 0             | 1           | -3.5          |
| NSA     | 4          | 7       | 3     | 12          | 10         | 3           | 0         | 4             | 12        | 8            | 12     | 12         | 5             | 6           | -7            |
| NES     | 0          | 8       | 0     | 0           | 0          | 12          | 0         | 0             | 0         | 0            | 10     | 5          | 0             | 0           | -2.5          |
| SAM     | 0          | 11      | 0     | 11          | 4          | 12          | 5         | 11            | 12        | 1            | 8      | 12         | 0             | 0           | -6.214285714  |
| SWS     | 7          | 12      | 11    | 12          | 12         | 12          | 12        | 12            | 0         | 11           | 12     | 12         | 12            | 0           | -9.785714286  |
| SIS     | 0          | 3       | 0     | 0           | 0          | 12          | 0         | 3             | 0         | 0            | 0      | 0          | 0             | 0           | -1.285714286  |
| SSA     | 0          | 12      | 0     | 0           | 0          | 12          | 12        | 12            | 0         | 5            | 12     | 12         | 0             | 0           | -5.5          |
| NEU     | 12         | 1       | 0     | 0           | 12         | 12          | 0         | 1             | 0         | 0            | 0      | 0          | 0             | 0           | -2.714285714  |
| WCE     | 4          | 2       | 0     | 0           | 0          | 0           | 0         | 0             | 0         | 0            | 0      | 0          | 0             | 0           | -0.428571429  |
| EEU     | 12         | 0       | 1     | 0           | 7          | 12          | 0         | 0             | 0         | 0            | 0      | 0          | 0             | 0           | -2.285714286  |
| MED     | 9          | 11      | 12    | 12          | 8          | 12          | 12        | 12            | 12        | 12           | 12     | 12         | 12            | 0           | -10.57142857  |
| SAH     | 0          | 0       | 0     | 0           | 0          | 0           | 0         | 0             | 0         | 0            | 0      | 0          | 0             | 12          | -0.857142857  |
| WAF     | 0          | 0       | 0     | 0           | 0          | 12          | 0         | 0             | 0         | 0            | 0      | 0          | 0             | 0           | -0.857142857  |
| CAF     | 0          | 0       | 0     | 0           | 0          | 12          | 0         | 0             | 0         | 0            | 0      | 0          | 0             | 0           | -0.857142857  |
| NEAF    | 0          | 0       | 0     | 0           | 0          | 0           | 0         | 0             | 0         | 0            | 0      | 0          | 0             | 0           | 0             |
| SEAF    | 0          | 0       | 0     | 0           | 0          | 7           | 0         | 0             | 0         | 0            | 0      | 0          | 0             | 0           | -0.5          |
| WSAF    | 0          | 6       | 11    | 12          | 3          | 6           | 10        | 10            | 0         | 2            | 7      | 8          | 0             | 0           | -5.357142857  |
| ESAF    | 0          | 4       | 0     | 0           | 4          | 6           | 7         | 5             | 0         | 0            | 12     | 11         | 0             | 0           | -3.5          |
| MDG     | 0          | 2       | 0     | 0           | 0          | 8           | 9         | 7             | 0         | 0            | 12     | 0          | 0             | 0           | -2.714285714  |
| RAR     | 12         | 4       | 0     | 0           | 12         | 12          | 0         | 0             | 0         | 0            | 0      | 0          | 0             | 12          | -3.714285714  |
| WSB     | 12         | 0       | 0     | 0           | 12         | 12          | 0         | 0             | 0         | 0            | 0      | 0          | 0             | 0           | -2.571428571  |
| ESB     | 12         | 0       | 0     | 0           | 12         | 12          | 0         | 0             | 9         | 0            | 0      | 12         | 0             | 12          | -4.928571429  |
| RFE     | 12         | 1       | 0     | 0           | 12         | 12          | 0         | 0             | 0         | 0            | 0      | 2          | 0             | 12          | -3.642857143  |
| WCA     | 0          | 0       | 0     | 0           | 6          | 6           | 0         | 0             | 8         | 3            | 0      | 0          | 0             | 0           | -1.642857143  |
| ECA     | 0          | 0       | 0     | 0           | 11         | 5           | 0         | 0             | 12        | 0            | 0      | 0          | 0             | 0           | -2            |
| TIB     | 12         | 3       | 0     | 0           | 12         | 12          | 0         | 0             | 0         | 12           | 0      | 0          | 0             | 12          | -4.5          |
| EAS     | 0          | 0       | 0     | 0           | 0          | 8           | 4         | 5             | 0         | 0            | 0      | 4          | 0             | 0           | -1.5          |
| ARP     | 0          | 0       | 0     | 0           | 0          | 0           | 0         | 0             | 0         | 0            | 0      | 0          | 0             | 0           | 0             |
| SAS     | 0          | 0       | 0     | 0           | 0          | 12          | 0         | 0             | 0         | 0            | 0      | 0          | 0             | 0           | -0.857142857  |
| SEA     | 0          | 3       | 0     | 0           | 0          | 0           | 0         | 0             | 0         | 0            | 0      | 0          | 0             | 0           | -0.214285714  |
| NAU     | 0          | 0       | 0     | 0           | 0          | 0           | 0         | 0             | 0         | 0            | 0      | 7          | 0             | 0           | -0.5          |
| CAU     | 0          | 2       | 0     | 0           | 0          | 0           | 0         | 0             | 0         | 3            | 0      | 0          | 0             | 0           | -0.357142857  |
| EAU     | 0          | 0       | 0     | 0           | 0          | 0           | 0         | 0             | 0         | 0            | 0      | 4          | 0             | 0           | -0.285714286  |
| SAU     | 1          | 2       | 10    | 12          | 0          | 12          | 0         | 0             | 0         | 0            | 0      | 6          | 0             | 4           | -3.357142857  |
| NZ      | 0          | 0       | 0     | 0           | 0          | 0           | 0         | 1             | 0         | 0            | 0      | 0          | 0             | 0           | -0.071428571  |
| EAN     | 0          | 12      | 0     | 0           | 0          | 0           | 0         | 9             | 0         | 0            | 0      | 0          | 0             | 0           | 0             |
| WAN     | 0          | 12      | 0     | 0           | 0          | 0           | 10        | 11            | 0         | 0            | 0      | 0          | 0             | 0           | 0             |

**Table S10.** Number of months with permanent wet departure in SSP1-2.6 for each climate reference region in every ESM. The land area covered in ice, i.e. Antarctica and Greenland are excluded from the analysis. These tables are also available as a data file: "Supplement-Tables S1-S12.xlsx".

| Regions | ACCESS-CM2 | CanESM5 | CESM2 | CESM2-WACCM | CNRM-CM6-1 | CNRM-ESM2-1 | EC-Earth3 | EC-Earth3-Veg | GFDL-ESM4 | IPSL-CM6A-LR | MIROC6 | MIROC-ES2L | MPI-ESM1-2-HR | UKESM1-0-LL | Ensemble Mean |
|---------|------------|---------|-------|-------------|------------|-------------|-----------|---------------|-----------|--------------|--------|------------|---------------|-------------|---------------|
| GIC     | 3          | 0       | 2     | 0           | 5          | 1           | 0         | 0             | 0         | 0            | 0      | 0          | 0             | 0           |               |
| NWN     | 0          | 0       | 12    | 12          | 0          | 0           | 1         | 0             | 12        | 0            | 0      | 12         | 0             | 0           | 3.5           |
| NEN     | 0          | 0       | 12    | 12          | 0          | 0           | 0         | 0             | 11        | 0            | 0      | 0          | 0             | 0           | 2.5           |
| WNA     | 0          | 0       | 0     | 0           | 0          | 0           | 0         | 0             | 12        | 0            | 0      | 0          | 0             | 0           | 0.857142857   |
| CNA     | 0          | 0       | 0     | 0           | 0          | 0           | 0         | 0             | 12        | 0            | 0      | 0          | 0             | 0           | 0.857142857   |
| ENA     | 0          | 0       | 0     | 0           | 0          | 0           | 0         | 0             | 0         | 0            | 0      | 0          | 0             | 0           | 0             |
| NCA     | 0          | 0       | 0     | 0           | 0          | 0           | 0         | 0             | 0         | 0            | 0      | 0          | 0             | 0           | 0             |
| SCA     | 0          | 0       | 0     | 0           | 0          | 0           | 0         | 0             | 0         | 0            | 0      | 1          | 0             | 0           | 0.071428571   |
| CAR     | 0          | 0       | 0     | 0           | 0          | 0           | 0         | 0             | 0         | 8            | 12     | 0          | 0             | 0           | 1.428571429   |
| NWS     | 0          | 0       | 0     | 0           | 0          | 0           | 0         | 0             | 0         | 0            | 0      | 0          | 0             | 0           | 0             |
| NSA     | 0          | 0       | 0     | 0           | 0          | 0           | 0         | 0             | 0         | 0            | 0      | 0          | 0             | 0           | 0             |
| NES     | 0          | 0       | 0     | 0           | 0          | 0           | 0         | 0             | 0         | 0            | 0      | 0          | 0             | 0           | 0             |
| SAM     | 0          | 0       | 0     | 0           | 0          | 0           | 0         | 0             | 0         | 0            | 0      | 0          | 0             | 0           | 0             |
| SWS     | 0          | 0       | 0     | 0           | 0          | 0           | 0         | 0             | 0         | 0            | 0      | 0          | 0             | 0           | 0             |
| SES     | 0          | 0       | 3     | 0           | 0          | 0           | 0         | 0             | 12        | 0            | 12     | 12         | 0             | 0           | 2.785714286   |
| SSA     | 0          | 0       | 0     | 0           | 0          | 0           | 0         | 0             | 12        | 0            | 0      | 0          | 0             | 0           | 0.857142857   |
| NEU     | 0          | 0       | 0     | 0           | 0          | 0           | 0         | 5             | 0         | 9            | 0      | 0          | 0             | 0           | 1             |
| WCE     | 0          | 0       | 0     | 0           | 0          | 0           | 0         | 0             | 0         | 0            | 12     | 3          | 0             | 0           | 1.071428571   |
| EEU     | 0          | 0       | 0     | 0           | 0          | 0           | 0         | 0             | 0         | 12           | 12     | 0          | 3             | 0           | 1.928571429   |
| MED     | 0          | 0       | 0     | 0           | 0          | 0           | 0         | 0             | 0         | 0            | 0      | 0          | 0             | 0           | 0             |
| SAH     | 0          | 12      | 0     | 0           | 0          | 0           | 12        | 4             | 0         | 12           | 0      | 0          | 0             | 0           | 2.857142857   |
| WAF     | 0          | 1       | 0     | 0           | 0          | 0           | 12        | 12            | 4         | 3            | 0      | 9          | 0             | 0           | 2.928571429   |
| CAF     | 0          | 0       | 0     | 0           | 0          | 0           | 9         | 7             | 0         | 0            | 0      | 12         | 0             | 0           | 2             |
| NEAF    | 3          | 0       | 9     | 12          | 0          | 0           | 4         | 0             | 0         | 3            | 12     | 0          | 3             | 0           | 3.285714286   |
| SEAF    | 0          | 0       | 0     | 5           | 0          | 0           | 0         | 0             | 0         | 0            | 0      | 2          | 0             | 0           | 0.5           |
| WSAF    | 0          | 0       | 0     | 0           | 0          | 0           | 0         | 0             | 0         | 0            | 0      | 0          | 0             | 0           | 0             |
| ESAF    | 0          | 0       | 0     | 0           | 0          | 0           | 0         | 0             | 0         | 0            | 0      | 0          | 0             | 0           | 0             |
| MDG     | 0          | 0       | 1     | 0           | 0          | 0           | 0         | 0             | 7         | 0            | 12     | 0          | 0             | 0           | 1.428571429   |
| RAR     | 0          | 0       | 12    | 4           | 0          | 0           | 6         | 10            | 12        | 0            | 1      | 0          | 0             | 0           | 3.214285714   |
| WSB     | 0          | 1       | 0     | 0           | 0          | 0           | 0         | 2             | 12        | 0            | 8      | 12         | 0             | 0           | 2.5           |
| ESB     | 0          | 1       | 0     | 0           | 0          | 0           | 1         | 5             | 0         | 0            | 12     | 0          | 0             | 0           | 1.357142857   |
| RFE     | 0          | 2       | 9     | 1           | 0          | 0           | 0         | 0             | 10        | 0            | 0      | 0          | 0             | 0           | 1.571428571   |
| WCA     | 0          | 0       | 0     | 0           | 0          | 0           | 0         | 0             | 0         | 0            | 0      | 0          | 0             | 0           | 0             |
| ECA     | 11         | 0       | 0     | 0           | 0          | 0           | 0         | 0             | 0         | 0            | 12     | 6          | 0             | 0           | 2.071428571   |
| TIB     | 0          | 0       | 2     | 2           | 0          | 5           | 0         | 9             | 12        | 0            | 0      | 0          | 0             | 0           | 2.142857143   |
| EAS     | 0          | 0       | 0     | 0           | 0          | 0           | 0         | 0             | 0         | 0            | 0      | 0          | 0             | 0           | 0             |
| ARP     | 0          | 12      | 12    | 12          | 0          | 0           | 12        | 6             | 0         | 0            | 0      | 0          | 0             | 0           | 3.857142857   |
| SAS     | 0          | 0       | 6     | 3           | 0          | 0           | 0         | 0             | 0         | 0            | 12     | 0          | 0             | 0           | 1.5           |
| SEA     | 0          | 0       | 0     | 0           | 0          | 0           | 0         | 0             | 0         | 0            | 0      | 0          | 0             | 0           | 0             |
| NAU     | 0          | 0       | 0     | 0           | 0          | 0           | 0         | 0             | 0         | 0            | 0      | 0          | 0             | 0           | 0             |
| CAU     | 0          | 0       | 0     | 0           | 0          | 0           | 0         | 0             | 0         | 0            | 0      | 4          | 0             | 0           | 0.285714286   |
| EAU     | 0          | 0       | 0     | 0           | 0          | 0           | 0         | 0             | 0         | 0            | 0      | 0          | 0             | 0           | 0             |
| SAU     | 0          | 0       | 0     | 0           | 0          | 0           | 0         | 1             | 0         | 0            | 0      | 0          | 0             | 0           | 0.071428571   |
| NZ      | 0          | 0       | 0     | 0           | 0          | 0           | 0         | 12            | 0         | 0            | 0      | 0          | 0             | 0           | 0.857142857   |
| EAN     | 9          | 0       | 12    | 12          | 12         | 12          | 0         | 0             | 0         | 0            | 0      | 0          | 0             | 0           | 0             |
| WAN     | 2          | 0       | 12    | 12          | 12         | 6           | 0         | 0             | 0         | 0            | 0      | 0          | 0             | 0           | 0             |

**Table S11.** As in S10, but for the SSP2-4.5 scenario.

| Regions | ACCESS-CM2 | CanESM5 | CESM2 | CESM2-WACCM | CNRM-CM6-1 | CNRM-ESM2-1 | EC-Earth3 | EC-Earth3-Veg | GFDL-ESM4 | IPSL-CM6A-LR | MIROC6 | MIROC-ES2L | MPI-ESM1-2-HR | UKESM1-0-LL | Ensemble Mean |
|---------|------------|---------|-------|-------------|------------|-------------|-----------|---------------|-----------|--------------|--------|------------|---------------|-------------|---------------|
| GIC     | 5          | 0       | 6     | 1           | 5          | 1           | 0         | 0             | 8         | 0            | 0      | 0          | 0             | 0           |               |
| NWN     | 0          | 0       | 12    | 12          | 0          | 0           | 0         | 0             | 12        | 0            | 0      | 12         | 4             | 0           | 3.714285714   |
| NEN     | 0          | 0       | 12    | 12          | 0          | 0           | 0         | 0             | 9         | 0            | 0      | 12         | 0             | 0           | 3.214285714   |
| WNA     | 0          | 0       | 0     | 0           | 0          | 0           | 0         | 0             | 12        | 0            | 0      | 0          | 0             | 1           | 0.928571429   |
| CNA     | 0          | 0       | 0     | 0           | 0          | 0           | 0         | 0             | 12        | 0            | 0      | 0          | 0             | 0           | 0.857142857   |
| ENA     | 0          | 0       | 0     | 2           | 0          | 0           | 0         | 0             | 0         | 0            | 0      | 0          | 0             | 0           | 0.142857143   |
| NCA     | 0          | 0       | 0     | 0           | 0          | 0           | 0         | 0             | 0         | 0            | 0      | 0          | 0             | 0           | 0             |
| SCA     | 0          | 0       | 0     | 0           | 0          | 0           | 0         | 0             | 0         | 0            | 0      | 0          | 0             | 0           | 0             |
| CAR     | 0          | 1       | 1     | 1           | 0          | 0           | 0         | 0             | 0         | 0            | 12     | 12         | 0             | 0           | 1.857142857   |
| NWS     | 0          | 0       | 0     | 0           | 0          | 0           | 0         | 0             | 0         | 0            | 2      | 0          | 0             | 0           | 0.142857143   |
| NSA     | 0          | 0       | 0     | 0           | 0          | 0           | 0         | 0             | 0         | 0            | 0      | 0          | 0             | 0           | 0             |
| NES     | 0          | 0       | 1     | 0           | 0          | 0           | 0         | 0             | 0         | 0            | 0      | 0          | 0             | 0           | 0.071428571   |
| SAM     | 0          | 0       | 0     | 0           | 0          | 0           | 0         | 0             | 0         | 0            | 0      | 0          | 0             | 0           | 0             |
| SWS     | 0          | 0       | 0     | 0           | 0          | 0           | 0         | 0             | 0         | 0            | 0      | 0          | 0             | 0           | 0             |
| SIS     | 0          | 0       | 12    | 6           | 0          | 0           | 0         | 0             | 12        | 0            | 12     | 12         | 0             | 0           | 3.857142857   |
| SSA     | 0          | 0       | 3     | 0           | 0          | 0           | 0         | 0             | 12        | 0            | 0      | 0          | 0             | 0           | 1.071428571   |
| NEU     | 0          | 1       | 0     | 0           | 0          | 0           | 1         | 10            | 10        | 1            | 12     | 0          | 1             | 0           | 1.857142857   |
| WCE     | 0          | 0       | 0     | 0           | 0          | 0           | 0         | 12            | 12        | 0            | 12     | 0          | 0             | 0           | 1.714285714   |
| EEU     | 0          | 2       | 0     | 0           | 0          | 0           | 0         | 12            | 12        | 0            | 12     | 12         | 0             | 4           | 3             |
| MED     | 0          | 0       | 0     | 0           | 0          | 0           | 0         | 0             | 0         | 0            | 0      | 0          | 0             | 0           | 0             |
| SAH     | 8          | 12      | 0     | 0           | 0          | 0           | 12        | 12            | 0         | 12           | 0      | 0          | 12            | 0           | 4.857142857   |
| WAF     | 4          | 2       | 0     | 0           | 0          | 0           | 12        | 12            | 5         | 5            | 0      | 0          | 12            | 0           | 3.714285714   |
| CAF     | 0          | 0       | 0     | 0           | 0          | 0           | 6         | 6             | 0         | 7            | 0      | 0          | 12            | 0           | 2.214285714   |
| NEAF    | 10         | 0       | 12    | 12          | 0          | 0           | 3         | 12            | 12        | 2            | 12     | 11         | 3             | 0           | 5.5           |
| SEAF    | 0          | 0       | 1     | 5           | 0          | 0           | 0         | 0             | 0         | 1            | 0      | 0          | 0             | 0           | 0.5           |
| WSAF    | 0          | 0       | 0     | 0           | 0          | 0           | 0         | 0             | 0         | 0            | 0      | 0          | 0             | 0           | 0             |
| ESAF    | 0          | 0       | 0     | 0           | 0          | 0           | 0         | 0             | 0         | 0            | 0      | 0          | 0             | 0           | 0             |
| MDG     | 0          | 0       | 0     | 0           | 0          | 0           | 0         | 0             | 0         | 0            | 0      | 9          | 0             | 0           | 0.642857143   |
| RAR     | 0          | 12      | 12    | 12          | 0          | 0           | 11        | 12            | 12        | 0            | 1      | 0          | 0             | 0           | 3.428571429   |
| WSB     | 0          | 5       | 0     | 8           | 0          | 0           | 3         | 12            | 12        | 1            | 0      | 12         | 0             | 1           | 3.214285714   |
| ESB     | 0          | 5       | 0     | 0           | 0          | 0           | 1         | 8             | 10        | 1            | 3      | 0          | 0             | 0           | 1.285714286   |
| RFE     | 0          | 2       | 12    | 9           | 0          | 0           | 1         | 10            | 0         | 0            | 0      | 0          | 0             | 0           | 2.428571429   |
| WCA     | 0          | 0       | 0     | 0           | 0          | 0           | 0         | 0             | 0         | 0            | 0      | 2          | 0             | 0           | 0.142857143   |
| ECA     | 12         | 0       | 0     | 0           | 0          | 0           | 8         | 0             | 0         | 0            | 12     | 12         | 0             | 0           | 3.142857143   |
| TIB     | 0          | 0       | 7     | 7           | 0          | 0           | 9         | 11            | 12        | 0            | 0      | 0          | 2             | 0           | 3.428571429   |
| EAS     | 0          | 0       | 0     | 0           | 0          | 0           | 0         | 0             | 0         | 0            | 0      | 0          | 0             | 0           | 0             |
| ARP     | 12         | 4       | 12    | 12          | 0          | 0           | 12        | 12            | 0         | 7            | 0      | 0          | 11            | 0           | 5.857142857   |
| SAS     | 0          | 0       | 11    | 7           | 0          | 0           | 7         | 0             | 0         | 0            | 11     | 0          | 10            | 0           | 3.285714286   |
| SEA     | 0          | 0       | 0     | 0           | 0          | 0           | 0         | 0             | 0         | 0            | 0      | 12         | 2             | 0           | 1             |
| NAU     | 0          | 0       | 0     | 0           | 0          | 0           | 0         | 0             | 0         | 0            | 0      | 0          | 2             | 0           | 0.142857143   |
| CAU     | 0          | 0       | 0     | 0           | 0          | 0           | 0         | 0             | 0         | 0            | 0      | 0          | 9             | 0           | 0.642857143   |
| EAU     | 0          | 0       | 0     | 0           | 0          | 0           | 0         | 0             | 0         | 0            | 0      | 0          | 0             | 0           | 0             |
| SAU     | 0          | 0       | 0     | 0           | 0          | 0           | 0         | 0             | 0         | 0            | 0      | 0          | 0             | 0           | 0             |
| NZ      | 0          | 0       | 0     | 0           | 0          | 0           | 0         | 0             | 12        | 1            | 0      | 2          | 0             | 0           | 1.071428571   |
| EAN     | 10         | 0       | 12    | 12          | 12         | 12          | 0         | 0             | 0         | 0            | 0      | 0          | 0             | 0           | 0             |
| WAN     | 12         | 0       | 12    | 12          | 12         | 9           | 0         | 0             | 0         | 0            | 0      | 0          | 0             | 0           | 0             |

**Table S12.** As in S10, but for the SSP3-7.0 scenario.

| Regions | ACCESS-CM2 | CanESM5 | CESM2 | CESM2-WACCM | CNRM-CM6-1 | CNRM-ESM2-1 | EC-Earth3 | EC-Earth3-Veg | GFDL-ESM4 | IPSL-CM6A-LR | MIROC6 | MIROC-ES2L | MPI-ESM1-2-HR | UKESM1-0-LL | Ensemble Mean |
|---------|------------|---------|-------|-------------|------------|-------------|-----------|---------------|-----------|--------------|--------|------------|---------------|-------------|---------------|
| GIC     | 5          | 0       | 12    | 12          | 5          | 2           | 0         | 0             | 8         | 0            | 5      | 0          | 1             | 0           |               |
| NWN     | 0          | 0       | 12    | 12          | 0          | 0           | 4         | 0             | 12        | 2            | 0      | 9          | 6             | 0           | 4.071428571   |
| NEN     | 0          | 0       | 12    | 12          | 0          | 0           | 0         | 0             | 10        | 2            | 0      | 10         | 0             | 0           | 3.285714286   |
| WNA     | 0          | 0       | 0     | 0           | 0          | 0           | 0         | 0             | 12        | 0            | 0      | 0          | 6             | 1           | 1.357142857   |
| CNA     | 0          | 0       | 0     | 0           | 0          | 0           | 0         | 0             | 12        | 0            | 0      | 0          | 0             | 0           | 0.857142857   |
| ENA     | 0          | 0       | 3     | 0           | 0          | 0           | 0         | 0             | 6         | 2            | 0      | 0          | 0             | 0           | 0.785714286   |
| NCA     | 0          | 0       | 0     | 0           | 0          | 0           | 0         | 0             | 0         | 0            | 0      | 0          | 0             | 0           | 0             |
| SCA     | 0          | 0       | 0     | 0           | 0          | 0           | 0         | 0             | 0         | 0            | 0      | 6          | 0             | 0           | 0.428571429   |
| CAR     | 0          | 0       | 0     | 0           | 0          | 0           | 0         | 0             | 0         | 0            | 11     | 12         | 0             | 0           | 1.642857143   |
| NWS     | 0          | 0       | 0     | 0           | 0          | 0           | 0         | 0             | 0         | 0            | 12     | 0          | 0             | 0           | 0.857142857   |
| NSA     | 0          | 0       | 0     | 0           | 0          | 0           | 0         | 0             | 0         | 0            | 0      | 0          | 0             | 0           | 0             |
| NES     | 0          | 0       | 1     | 0           | 0          | 0           | 0         | 0             | 0         | 0            | 0      | 0          | 0             | 0           | 0.071428571   |
| SAM     | 0          | 0       | 0     | 0           | 0          | 0           | 0         | 0             | 0         | 0            | 0      | 0          | 0             | 0           | 0             |
| SWS     | 0          | 0       | 0     | 0           | 0          | 0           | 0         | 0             | 0         | 0            | 0      | 0          | 0             | 0           | 0             |
| SIS     | 1          | 0       | 11    | 11          | 2          | 0           | 0         | 0             | 12        | 0            | 12     | 12         | 0             | 0           | 4.357142857   |
| SSA     | 0          | 0       | 0     | 0           | 0          | 0           | 0         | 0             | 12        | 0            | 0      | 0          | 0             | 0           | 0.857142857   |
| NEU     | 0          | 2       | 0     | 1           | 0          | 0           | 2         | 5             | 12        | 3            | 12     | 0          | 0             | 1           | 2.714285714   |
| WCE     | 0          | 0       | 0     | 0           | 0          | 0           | 0         | 0             | 7         | 0            | 12     | 0          | 0             | 0           | 1.357142857   |
| EEU     | 0          | 4       | 0     | 0           | 0          | 0           | 0         | 2             | 12        | 3            | 12     | 12         | 3             | 3           | 3.642857143   |
| MED     | 0          | 0       | 0     | 0           | 0          | 0           | 0         | 0             | 0         | 0            | 0      | 0          | 0             | 0           | 0             |
| SAH     | 0          | 12      | 12    | 0           | 0          | 8           | 12        | 12            | 0         | 12           | 12     | 11         | 12            | 0           | 7.357142857   |
| WAF     | 5          | 4       | 5     | 0           | 4          | 0           | 12        | 12            | 6         | 7            | 0      | 0          | 12            | 4           | 5.071428571   |
| CAF     | 11         | 1       | 5     | 1           | 2          | 0           | 4         | 8             | 0         | 12           | 4      | 0          | 12            | 1           | 4.357142857   |
| NEAF    | 12         | 4       | 12    | 12          | 0          | 0           | 1         | 5             | 12        | 9            | 12     | 10         | 12            | 12          | 8.071428571   |
| SEAF    | 4          | 4       | 7     | 6           | 0          | 0           | 0         | 0             | 12        | 5            | 0      | 0          | 12            | 7           | 4.071428571   |
| WSAF    | 0          | 0       | 0     | 0           | 0          | 0           | 0         | 0             | 0         | 0            | 0      | 0          | 0             | 0           | 0             |
| ESAF    | 0          | 0       | 0     | 0           | 0          | 0           | 0         | 0             | 0         | 0            | 0      | 0          | 7             | 0           | 0.5           |
| MDG     | 0          | 0       | 0     | 0           | 0          | 0           | 0         | 0             | 0         | 0            | 0      | 0          | 12            | 0           | 0.857142857   |
| RAR     | 0          | 12      | 12    | 12          | 0          | 0           | 9         | 11            | 12        | 1            | 0      | 0          | 6             | 0           | 4.5           |
| WSB     | 0          | 7       | 0     | 0           | 0          | 0           | 2         | 7             | 12        | 3            | 12     | 12         | 3             | 3           | 4.357142857   |
| ESB     | 0          | 5       | 0     | 1           | 0          | 0           | 2         | 8             | 0         | 0            | 12     | 0          | 0             | 0           | 2             |
| RFE     | 0          | 2       | 12    | 12          | 0          | 0           | 1         | 7             | 12        | 0            | 0      | 0          | 0             | 0           | 3.285714286   |
| WCA     | 0          | 0       | 0     | 0           | 0          | 0           | 0         | 2             | 0         | 0            | 12     | 7          | 5             | 0           | 1.857142857   |
| ECA     | 12         | 0       | 10    | 0           | 0          | 0           | 11        | 1             | 0         | 4            | 12     | 12         | 0             | 2           | 4.571428571   |
| TIB     | 0          | 0       | 10    | 10          | 0          | 0           | 0         | 0             | 9         | 0            | 0      | 0          | 5             | 0           | 2.428571429   |
| EAS     | 0          | 0       | 0     | 0           | 0          | 0           | 0         | 0             | 0         | 0            | 0      | 0          | 0             | 0           | 0             |
| ARP     | 0          | 6       | 12    | 12          | 0          | 0           | 12        | 12            | 0         | 12           | 12     | 0          | 12            | 0           | 6.428571429   |
| SAS     | 5          | 1       | 12    | 12          | 3          | 0           | 0         | 0             | 3         | 0            | 12     | 0          | 12            | 0           | 4.285714286   |
| SEA     | 0          | 0       | 0     | 0           | 1          | 0           | 0         | 0             | 0         | 0            | 0      | 12         | 9             | 0           | 1.571428571   |
| NAU     | 0          | 0       | 0     | 0           | 0          | 0           | 0         | 0             | 0         | 0            | 0      | 0          | 5             | 0           | 0.357142857   |
| CAU     | 0          | 0       | 0     | 0           | 0          | 0           | 0         | 0             | 0         | 0            | 0      | 0          | 12            | 0           | 0.857142857   |
| EAU     | 0          | 0       | 0     | 0           | 0          | 0           | 0         | 0             | 0         | 0            | 0      | 0          | 0             | 0           | 0             |
| SAU     | 0          | 0       | 0     | 0           | 0          | 0           | 0         | 0             | 0         | 0            | 0      | 0          | 0             | 0           | 0             |
| NZ      | 0          | 0       | 0     | 0           | 0          | 0           | 0         | 0             | 12        | 0            | 0      | 0          | 0             | 0           | 0.857142857   |
| EAN     | 11         | 0       | 12    | 12          | 12         | 12          | 0         | 0             | 0         | 0            | 0      | 0          | 0             | 0           | 0             |
| WAN     | 12         | 0       | 12    | 12          | 12         | 10          | 0         | 0             | 0         | 0            | 0      | 0          | 0             | 0           | 0             |

**Table S13.** As in S10, but for the SSP5-8.5 scenario.

| Regions | ACCESS-CM2 | CanESM5 | CESM2 | CESM2-WACCM | CNRM-CM6-1 | CNRM-ESM2-1 | EC-Earth3 | EC-Earth3-Veg | GFDL-ESM4 | IPSL-CM6A-LR | MIROC6 | MIROC-ES2L | MPI-ESM1-2-HR | UKESM1-0-LL | Ensemble Mean |
|---------|------------|---------|-------|-------------|------------|-------------|-----------|---------------|-----------|--------------|--------|------------|---------------|-------------|---------------|
| GIC     | 5          | 0       | 12    | 12          | 4          | 0           | 0         | 8             | 8         | 0            | 5      | 0          | 6             | 0           |               |
| NWN     | 0          | 0       | 12    | 12          | 0          | 0           | 5         | 12            | 12        | 5            | 7      | 12         | 6             | 0           | 5.285714286   |
| NEN     | 0          | 0       | 12    | 12          | 0          | 0           | 1         | 0             | 0         | 5            | 3      | 12         | 0             | 0           | 3.214285714   |
| WNA     | 0          | 0       | 0     | 0           | 1          | 0           | 0         | 12            | 12        | 0            | 3      | 0          | 2             | 3           | 1.5           |
| CNA     | 0          | 0       | 0     | 0           | 0          | 0           | 0         | 0             | 0         | 0            | 0      | 0          | 0             | 1           | 0.071428571   |
| ENA     | 0          | 0       | 4     | 4           | 0          | 0           | 0         | 0             | 0         | 0            | 0      | 0          | 1             | 3           | 0.857142857   |
| NCA     | 0          | 0       | 0     | 0           | 0          | 0           | 0         | 0             | 0         | 0            | 0      | 0          | 0             | 1           | 0.071428571   |
| SCA     | 0          | 0       | 0     | 0           | 0          | 0           | 0         | 0             | 0         | 0            | 0      | 0          | 0             | 0           | 0             |
| CAR     | 0          | 0       | 0     | 0           | 0          | 0           | 0         | 0             | 0         | 0            | 12     | 12         | 0             | 0           | 1.714285714   |
| NWS     | 0          | 0       | 0     | 0           | 0          | 0           | 0         | 0             | 0         | 0            | 6      | 0          | 0             | 0           | 0.428571429   |
| NSA     | 0          | 0       | 0     | 0           | 0          | 0           | 0         | 0             | 0         | 0            | 0      | 0          | 0             | 0           | 0             |
| NES     | 0          | 0       | 2     | 2           | 0          | 0           | 0         | 0             | 0         | 0            | 0      | 0          | 0             | 0           | 0.285714286   |
| SAM     | 0          | 0       | 0     | 0           | 0          | 0           | 0         | 0             | 0         | 0            | 0      | 0          | 0             | 0           | 0             |
| SWS     | 0          | 0       | 0     | 0           | 0          | 0           | 0         | 0             | 0         | 0            | 0      | 0          | 0             | 0           | 0             |
| SES     | 9          | 0       | 12    | 12          | 0          | 0           | 0         | 12            | 12        | 0            | 12     | 12         | 0             | 4           | 5.214285714   |
| SSA     | 0          | 0       | 0     | 0           | 0          | 0           | 0         | 12            | 12        | 0            | 0      | 0          | 0             | 0           | 0.857142857   |
| NEU     | 0          | 1       | 2     | 4           | 0          | 1           | 3         | 12            | 12        | 5            | 12     | 7          | 3             | 2           | 3.714285714   |
| WCE     | 0          | 0       | 0     | 0           | 0          | 0           | 0         | 12            | 12        | 0            | 10     | 6          | 0             | 0           | 2             |
| EEU     | 0          | 2       | 0     | 0           | 0          | 2           | 2         | 12            | 12        | 4            | 12     | 12         | 0             | 5           | 3.642857143   |
| MED     | 0          | 0       | 0     | 0           | 0          | 0           | 0         | 0             | 0         | 0            | 0      | 0          | 0             | 0           | 0             |
| SAH     | 0          | 12      | 6     | 2           | 0          | 12          | 12        | 0             | 0         | 12           | 12     | 12         | 12            | 0           | 6.571428571   |
| WAF     | 0          | 7       | 0     | 0           | 4          | 0           | 12        | 5             | 5         | 5            | 0      | 0          | 12            | 4           | 4.357142857   |
| CAF     | 11         | 0       | 0     | 4           | 4          | 0           | 8         | 10            | 1         | 12           | 4      | 0          | 12            | 6           | 5.142857143   |
| NEAF    | 12         | 6       | 12    | 12          | 3          | 0           | 4         | 12            | 12        | 12           | 12     | 12         | 12            | 11          | 9.428571429   |
| SEAF    | 10         | 5       | 12    | 12          | 0          | 9           | 12        | 0             | 7         | 7            | 0      | 3          | 12            | 7           | 6.357142857   |
| WSAF    | 0          | 0       | 0     | 0           | 0          | 0           | 0         | 0             | 0         | 0            | 0      | 0          | 0             | 0           | 0             |
| ESAF    | 0          | 0       | 0     | 0           | 0          | 0           | 0         | 0             | 0         | 0            | 0      | 2          | 0             | 0           | 0.142857143   |
| MDG     | 0          | 0       | 0     | 0           | 0          | 0           | 0         | 6             | 6         | 0            | 0      | 0          | 12            | 0           | 1.285714286   |
| RAR     | 0          | 12      | 12    | 12          | 0          | 9           | 9         | 12            | 12        | 3            | 7      | 0          | 7             | 0           | 5.071428571   |
| WSB     | 0          | 4       | 2     | 1           | 0          | 0           | 3         | 8             | 12        | 6            | 12     | 12         | 1             | 7           | 4.857142857   |
| ESB     | 0          | 2       | 5     | 12          | 0          | 0           | 2         | 5             | 0         | 2            | 12     | 0          | 2             | 0           | 3             |
| RFE     | 0          | 0       | 10    | 12          | 0          | 0           | 5         | 7             | 12        | 0            | 0      | 0          | 5             | 0           | 3.642857143   |
| WCA     | 11         | 0       | 0     | 0           | 0          | 0           | 0         | 0             | 0         | 0            | 0      | 0          | 6             | 6           | 1.642857143   |
| ECA     | 12         | 0       | 9     | 4           | 0          | 0           | 9         | 0             | 0         | 11           | 12     | 12         | 0             | 4           | 5.214285714   |
| TIB     | 0          | 0       | 10    | 12          | 0          | 0           | 0         | 2             | 2         | 0            | 0      | 0          | 9             | 0           | 2.357142857   |
| EAS     | 0          | 0       | 1     | 0           | 0          | 0           | 0         | 0             | 0         | 1            | 0      | 0          | 11            | 0           | 0.928571429   |
| ARP     | 12         | 12      | 12    | 12          | 0          | 12          | 12        | 0             | 0         | 12           | 12     | 12         | 12            | 0           | 8.571428571   |
| SAS     | 0          | 0       | 12    | 12          | 0          | 1           | 6         | 12            | 12        | 0            | 12     | 0          | 12            | 2           | 4.928571429   |
| SEA     | 0          | 0       | 0     | 0           | 5          | 0           | 0         | 0             | 0         | 0            | 0      | 12         | 12            | 0           | 2.071428571   |
| NAU     | 0          | 0       | 0     | 0           | 0          | 0           | 0         | 0             | 0         | 0            | 0      | 0          | 5             | 0           | 0.357142857   |
| CAU     | 0          | 0       | 0     | 0           | 0          | 0           | 0         | 0             | 0         | 0            | 0      | 0          | 12            | 0           | 0.857142857   |
| EAU     | 0          | 0       | 0     | 0           | 0          | 0           | 0         | 0             | 0         | 0            | 0      | 0          | 0             | 0           | 0             |
| SAU     | 0          | 0       | 0     | 0           | 0          | 0           | 0         | 0             | 0         | 0            | 0      | 0          | 0             | 0           | 0             |
| NZ      | 0          | 0       | 0     | 0           | 0          | 0           | 0         | 5             | 5         | 0            | 0      | 1          | 0             | 0           | 0.428571429   |
| EAN     | 12         | 0       | 12    | 12          | 12         | 12          | 0         | 0             | 0         | 0            | 0      | 0          | 0             | 0           | 0             |
| WAN     | 12         | 0       | 12    | 12          | 12         | 7           | 0         | 0             | 0         | 0            | 0      | 0          | 0             | 0           | 0             |

## References

- 5 Iturbide, M., Gutiérrez, J. M., Alves, L. M., Bedia, J., Cerezo-Mota, R., Gimadevilla, E., Cofiño, A. S., Di Luca, A., Faria, S. H., Gorodetskaya, I. V., Hauser, M., Herrera, S., Hennessy, K., Hewitt, H. T., Jones, R. G., Krakovska, S., Manzanas, R., Martínez-Castro, D., Narisma, G. T., Nurhati, I. S., Pinto, I., Seneviratne, S. I., van den Hurk, B., and Vera, C. S.: An update of IPCC climate reference regions for subcontinental analysis of climate model data: definition and aggregated datasets, *Earth System Science Data*, 12, 2959–2970, <https://doi.org/10.5194/essd-12-2959-2020>, 2020.
